# Supplementary material for: Hybridization patterns in two contact zones of grass snakes reveal a new Central European snake species
Source: PubMed Central journal article supplement (PMC5547120; doi:10.1038/s41598-017-07847-9), 2017-08-07
Supplement: 41598_2017_7847_MOESM1_ESM.pdf [file 41598_2017_7847_MOESM1_ESM.pdf]

# **Hybridization patterns in two contact zones of grass snakes reveal a new Central European snake species**

Carolin Kindler, Maxime Chèvre, Sylvain Ursenbacher, Wolfgang Böhme,  
Axel Hille, Daniel Jablonski, Melita Vamberger & Uwe Fritz

*Scientific Reports*

**Supplementary Information**

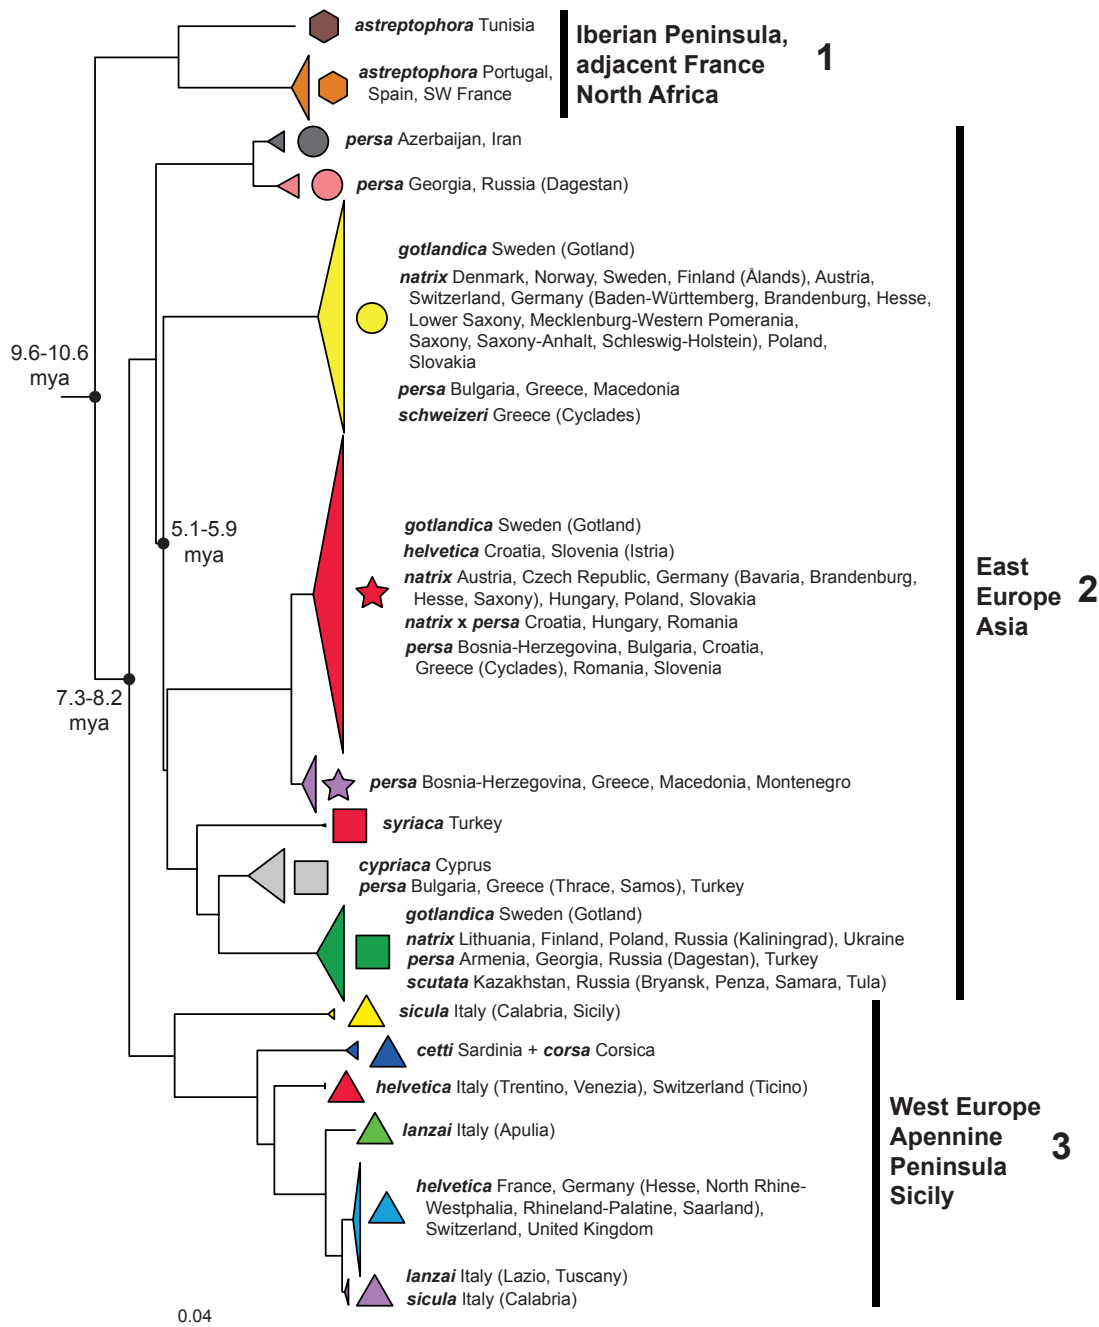

**Figure S1. Simplified mitochondrial phylogeny for grass snakes** (from Kindler *et al.* 2013, 2014 based on 1,984 bp of ND4 and *cyt b*). The three major clades 1-3 are highlighted; numbers at nodes indicate split ages according to Fritz *et al.* (2012). The new record for Gotland, Sweden, is added (clade with green square). Note the many mismatches between morphologically defined taxa and mitochondrial clades. The traditional identification of grass snakes from Istria (Kabisch 1999; Kreiner 2007) is in error and also conflicts with morphology (unpubl. data). The figure was created using ADOBE ILLUSTRATOR CS6 (<http://www.adobe.com/products/illustrator.html>).

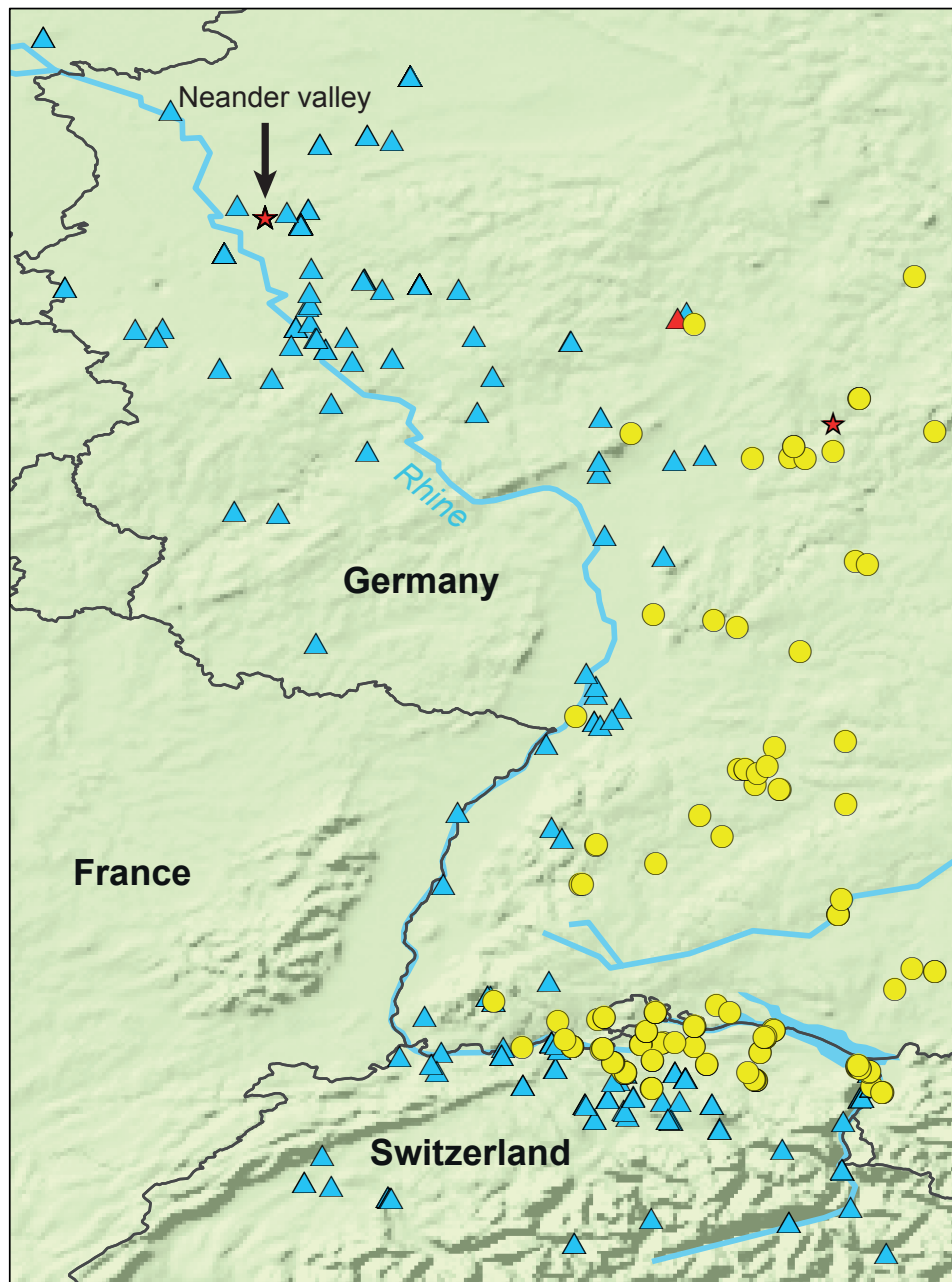

**Figure S2. Distribution of mitochondrial haplotypes in the western contact zone.** Symbols correspond to Figures 1 and S1. Arrow highlights allochthonous population of the 'red lineage' in the Neander valley. Red triangle represents a non-native lineage from northern Italy. Map was created using ARCGIS 10.2 (<http://www.esri.com/arcgis>) and ADOBE ILLUSTRATOR CS6 (<http://www.adobe.com/products/illustrator.html>).

(a) *helvetica* and all eastern lineages

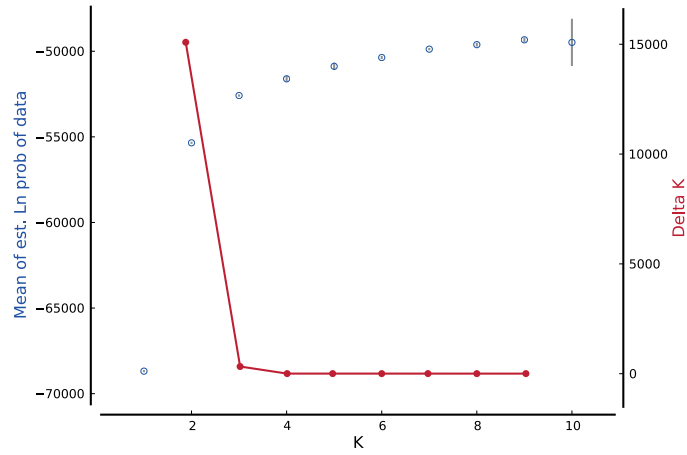

(b) All eastern lineages without impact of *helvetica*

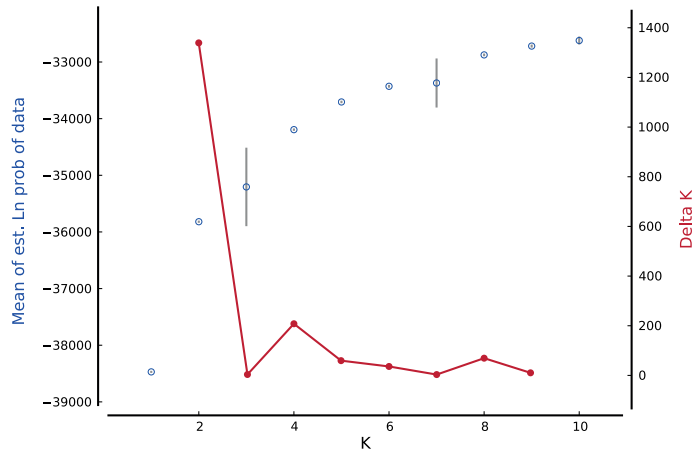

(c) Yellow and red lineage without impact of adjacent lineages

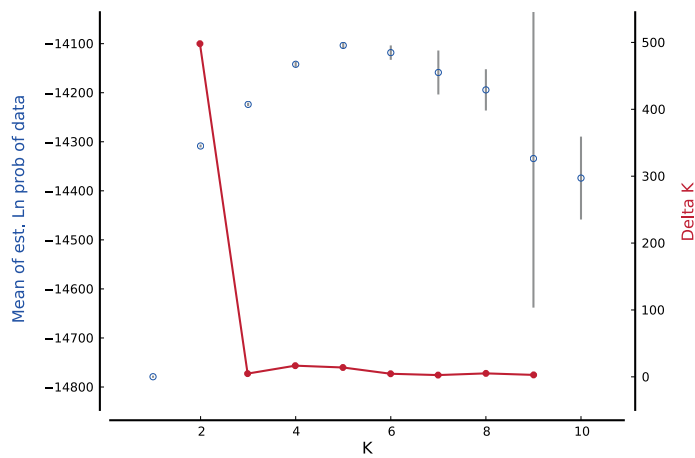

**Figure S3.  $\Delta K$  values and posterior probabilities for STRUCTURE runs for three data sets using STRUCTURE HARVESTER (Earl & vonHoldt, 2012).** The modal value is always at  $K=2$ .  $K=1$  could be excluded because of the higher posterior probabilities for  $K=2$ .

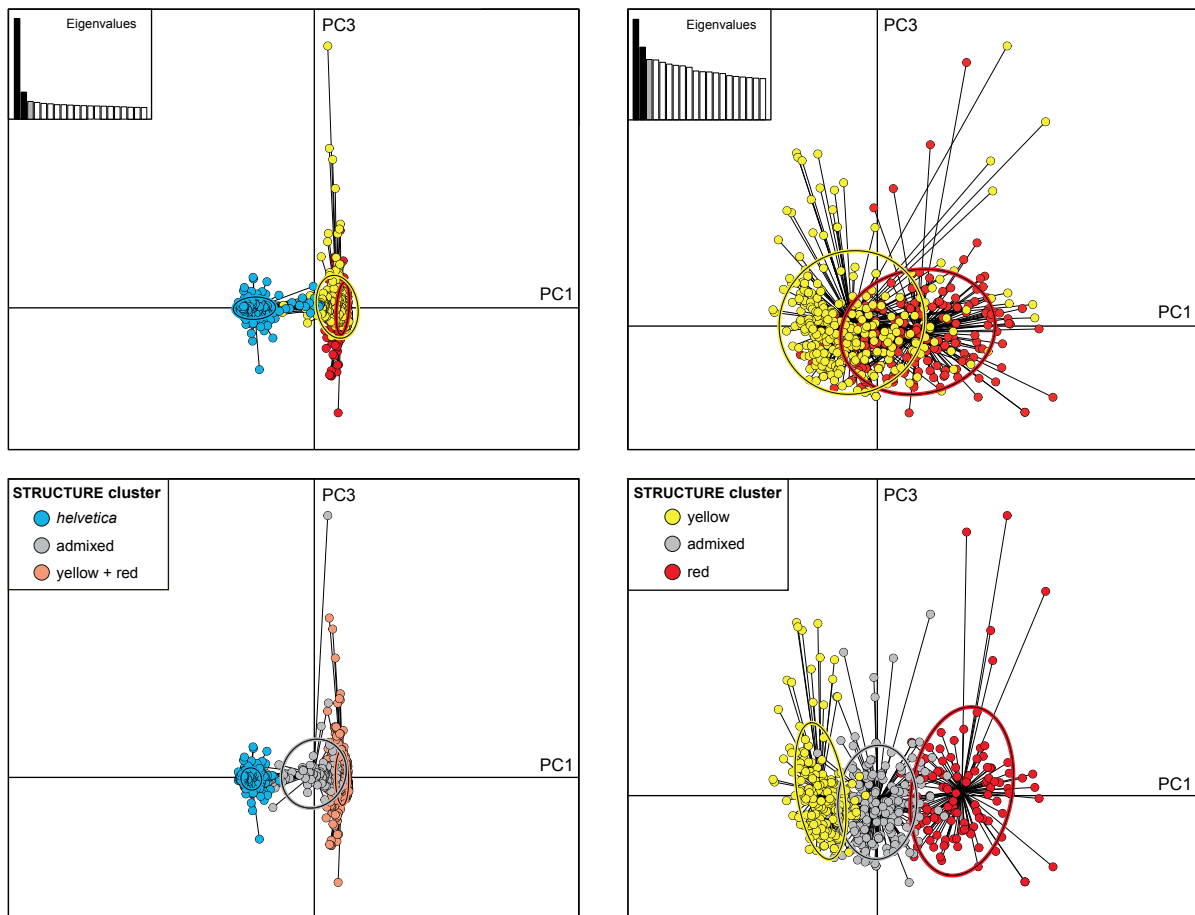

**Figure S4. PCA axes 1–3 for microsatellite data of both contact zones.** Samples are coloured according to mtDNA lineages (top) and STRUCTURE clusters (bottom). Admixed individuals were categorized according to HYBRIDLAB results. PCAs for the yellow and red lineages correspond to the samples from Figure 3c. Non-native samples were excluded. The oval outlines represent 95% confidential intervals. For *helvetica* and the eastern lineages (left), the x axis explains 16.6% and the y axis 2.9% of variation. For the eastern lineages (right), the x axis explains 3.8% and the y axis 2.4% of variation.

**Table S1. Samples studied.** Blue vouchers correspond to samples processed at the University of Basel. mtDNA data colour-coded according to genetic lineage. Accession numbers indicate samples from previous studies which were too short for an unambiguous assignment to haplotypes. STRUCTURE clusters colour-coded according to legend on the right.

Colour code:

|                   |                           |                |
|-------------------|---------------------------|----------------|
| helvetica cluster | cluster yellow + red      | yellow cluster |
| eastern cluster   | cluster adjacent lineages | red cluster    |
| admixed           | admixed                   | admixed        |

| Voucher        | Locality                                                   | mtDNA data  |               |                 | Microsatellite data |                      |                     | Reference             |
|----------------|------------------------------------------------------------|-------------|---------------|-----------------|---------------------|----------------------|---------------------|-----------------------|
|                |                                                            | mtDNA clade | ND4 haplotype | cyt b haplotype | First STRUCTURE run | Second STRUCTURE run | Third STRUCTURE run |                       |
| MTD T 10627    | Albania: Boboshticë                                        | 5           | 111           | 110             | 0.00                | 0.39                 | -                   | This study            |
| MTD T 13543    | Albania: Capijati pass                                     | 5           | 12            | 110             | 0.04                | 0.04                 | -                   | This study            |
| MTD T 13544    | Albania: Capijati pass                                     | 5           | 12            | 118             | 0.00                | 0.71                 | -                   | This study            |
| MTD T 14777    | Albania: Dvojakë-Karavastë National Park                   | 5           | 17            | 115             | 0.03                | 0.04                 | -                   | This study            |
| MTD T 11602    | Albania: Fiores                                            | 5           | 15            | 118             | 0.01                | 0.18                 | -                   | This study            |
| MTD T 13803    | Albania: Gëzbovë                                           | 5           | 12            | 116             | 0.01                | 0.21                 | -                   | This study            |
| MTD T 11603    | Albania: Koder                                             | 5           | 16            | -               | 0.05                | 0.04                 | -                   | This study            |
| MTD T 13804    | Albania: near Memaçaj; Schendil Mountains                  | 5           | 13            | -               | 0.00                | 0.02                 | -                   | This study            |
| MTD T 13905    | Albania: near Memaçaj; Schendil Mountains                  | 5           | 12            | -               | 0.01                | 0.11                 | -                   | This study            |
| MTD T 13906    | Albania: near Memaçaj; Schendil Mountains                  | 5           | 19            | 117             | 0.10                | -                    | -                   | This study            |
| MTD T 13901    | Albania: near Sakë; Trebeshtine Mountains                  | 5           | 12            | 110             | 0.25                | -                    | -                   | This study            |
| MTD T 13902    | Albania: near Sakë; Trebeshtine Mountains                  | 5           | 12            | 119             | 0.01                | 0.02                 | -                   | This study            |
| MTD T 11598    | Albania: near Sakë; Trebeshtine Mountains                  | 5           | 120           | 120             | 0.01                | 0.33                 | -                   | This study            |
| MTD T 11599    | Albania: Shalës                                            | 5           | 16            | 110             | 0.00                | 0.16                 | -                   | This study            |
| MTD T 11600    | Albania: Shalës                                            | 5           | 16            | 121             | 0.00                | 0.10                 | -                   | This study            |
| MTD T 14757    | Armenia: Nobkhark                                          | 8           | gn10          | gn17            | 0.02                | 0.03                 | -                   | This study            |
| MTD T 14758    | Armenia: Nobkhark                                          | 8           | gn10          | gn17            | 0.01                | 0.02                 | -                   | This study            |
| MTD T 14759    | Armenia: Nobkhark                                          | 8           | gn10          | gn17            | 0.09                | -                    | -                   | This study            |
| ZFMK 65105     | Austria: Burgenland: Andau                                 | 4           | r30           | r3              | 0.00                | 0.80                 | -                   | Kindler et al. (2013) |
| NHMW 39266 (2) | Austria: Burgenland: Apetlon                               | 4           | r3            | r18             | 0.00                | 0.98                 | 0.05                | This study            |
| ZFMK 68656     | Austria: Burgenland: Apetlon                               | 4           | r4            | r34             | 0.00                | 0.91                 | -                   | Kindler et al. (2013) |
| ZFMK 55995     | Austria: Burgenland: Brieterebrunn                         | 4           | r4            | r34             | 0.00                | 0.83                 | -                   | Kindler et al. (2013) |
| NHMW 39030 (2) | Austria: Burgenland: Eisenstadt                            | 4           | r4            | r34             | 0.00                | 0.96                 | 0.15                | This study            |
| ZFMK 51746     | Austria: Burgenland: Hölle                                 | 4           | -             | r35             | 0.00                | 0.93                 | -                   | Kindler et al. (2013) |
| ZFMK 74926     | Austria: Burgenland: Illnitzz                              | 4           | r4            | r34             | 0.00                | 0.92                 | -                   | Kindler et al. (2013) |
| ZFMK 83775     | Austria: Burgenland: Illnitzz                              | 4           | -             | r65             | 0.00                | 0.96                 | 0.15                | Kindler et al. (2013) |
| ZFMK 65687     | Austria: Burgenland: Jois                                  | 4           | r3            | r10             | 0.00                | 0.69                 | -                   | Kindler et al. (2013) |
| NHMW 38644     | Austria: Burgenland: Lake Neusiedl                         | 4           | r3            | -               | 0.00                | 0.92                 | -                   | This study            |
| MTD T 11991    | Austria: Burgenland: Lake Neusiedl: Illnitzz               | 4           | r4            | -               | 0.00                | 0.56                 | -                   | This study            |
| MTD T 12062    | Austria: Burgenland: Lake Neusiedl: Illnitzz               | 4           | r4            | -               | 0.01                | 0.52                 | -                   | This study            |
| MTD T 12063    | Austria: Burgenland: Lake Neusiedl: Illnitzz               | 4           | r4            | -               | 0.00                | 0.86                 | -                   | This study            |
| NHMW 38809     | Austria: Burgenland: Lake Neusiedl: Illnitzz               | 4           | r4            | r34             | 0.00                | 0.79                 | -                   | This study            |
| NHMW 39436 (2) | Austria: Burgenland: Lake Neusiedl: Illnitzz               | 4           | r4            | r43             | 0.00                | 0.97                 | 0.09                | This study            |
| NHMW 40024 (1) | Austria: Burgenland: Lake Neusiedl: Illnitzz               | 4           | r4            | r15             | 0.00                | 0.89                 | -                   | This study            |
| MTD T 11986    | Austria: Burgenland: Lake Neusiedl: Jois                   | 4           | r4            | r53             | 0.00                | 0.90                 | -                   | This study            |
| MTD T 11987    | Austria: Burgenland: Lake Neusiedl: Jois                   | 4           | r4            | r39             | 0.00                | 0.95                 | 0.09                | This study            |
| MTD T 11988    | Austria: Burgenland: Lake Neusiedl: Jois                   | 4           | r30           | -               | 0.00                | 0.78                 | -                   | This study            |
| MTD T 11989    | Austria: Burgenland: Lake Neusiedl: Jois                   | 4           | r4            | r34             | 0.00                | 0.98                 | 0.18                | This study            |
| MTD T 11990    | Austria: Burgenland: Lake Neusiedl: Jois                   | 4           | r4            | -               | -                   | -                    | -                   | This study            |
| MTD T 11992    | Austria: Burgenland: Lake Neusiedl: Jois                   | 4           | r4            | r56             | 0.00                | 0.96                 | 0.06                | This study            |
| MTD T 12068    | Austria: Burgenland: Lake Neusiedl: Jois                   | 4           | r4            | -               | -                   | -                    | -                   | This study            |
| MTD T 12069    | Austria: Burgenland: Lake Neusiedl: Jois                   | 4           | r4            | -               | 0.00                | 0.98                 | 0.18                | This study            |
| MTD T 12070    | Austria: Burgenland: Lake Neusiedl: Jois                   | 4           | r4            | -               | -                   | -                    | -                   | This study            |
| MTD T 12071    | Austria: Burgenland: Lake Neusiedl: Jois                   | 4           | r4            | -               | 0.00                | 0.96                 | 0.10                | This study            |
| MTD T 12072    | Austria: Burgenland: Lake Neusiedl: Jois                   | 4           | r4            | -               | -                   | -                    | -                   | This study            |
| MTD T 12073    | Austria: Burgenland: Lake Neusiedl: Jois                   | 4           | r4            | -               | -                   | -                    | -                   | This study            |
| MTD T 12074    | Austria: Burgenland: Lake Neusiedl: Jois                   | 4           | r4            | -               | 0.00                | 0.90                 | -                   | This study            |
| MTD T 12075    | Austria: Burgenland: Lake Neusiedl: Jois                   | 4           | r4            | -               | -                   | -                    | -                   | This study            |
| MTD T 12076    | Austria: Burgenland: Lake Neusiedl: Jois                   | 4           | r30           | r10             | 0.00                | 0.79                 | -                   | This study            |
| MTD T 12077    | Austria: Burgenland: Lake Neusiedl: Jois                   | 4           | r3            | -               | 0.00                | 0.69                 | -                   | This study            |
| MTD T 12078    | Austria: Burgenland: Lake Neusiedl: Jois                   | 4           | r4            | -               | -                   | -                    | -                   | This study            |
| NHMW 39266 (1) | Austria: Burgenland: Lake Neusiedl: Neusiedl am See        | 4           | r4            | r56             | 0.00                | 0.98                 | 0.22                | This study            |
| ZFMK 51670     | Austria: Burgenland: Weiden am See                         | 4           | r10           | r34             | 0.00                | 0.67                 | -                   | Kindler et al. (2013) |
| ZFMK 91242     | Austria: Burgenland: Ziznamsdorfer Wiesen                  | 4           | r4            | r35             | 0.00                | 0.89                 | -                   | Kindler et al. (2013) |
| MTD T 11964    | Austria: Carinthia: Lake Faak                              | 4           | r4            | -               | -                   | -                    | -                   | This study            |
| NHMW 39030 (1) | Austria: Lower Austria: Asperndorf                         | 4           | r4            | r34             | 0.00                | 0.99                 | 0.14                | This study            |
| MTD T 9912     | Austria: Lower Austria: Bergen                             | 4           | r3            | r10             | 0.00                | 0.87                 | -                   | Kindler et al. (2013) |
| NHMW 38541     | Austria: Lower Austria: Ernshausen                         | 4           | r4            | r34             | 0.00                | 0.98                 | 0.09                | This study            |
| NHMW 36728     | Austria: Lower Austria: Grünbach am Schneeberg             | 4           | r4            | r34             | 0.00                | 0.98                 | 0.37                | This study            |
| ZFMK 83922     | Austria: Lower Austria: Losenheim                          | 4           | r9            | r34             | 0.00                | 0.91                 | -                   | Kindler et al. (2013) |
| NHMW 36405 (3) | Austria: Lower Austria: NE Döbings                         | 4           | r4            | r34             | 0.02                | 0.97                 | 0.13                | This study            |
| NHMW 36695 (1) | Austria: Lower Austria: near Hollbrunn                     | 4           | r3            | r10             | 0.00                | 0.99                 | 0.17                | This study            |
| NHMW 36695 (2) | Austria: Lower Austria: near Hollbrunn                     | 4           | r3            | r10             | 0.00                | 0.86                 | -                   | This study            |
| NHMW 36405 (2) | Austria: Lower Austria: Obereditz                          | 4           | r4            | r34             | 0.00                | 0.98                 | 0.06                | This study            |
| NHMW 40084 (2) | Austria: Lower Austria: Orth an der Donau                  | 4           | r3            | r10             | 0.00                | 0.89                 | -                   | This study            |
| NHMW 38557 (1) | Austria: Lower Austria: Perchtoldsdorf                     | 4           | r4            | r52             | 0.00                | 0.83                 | -                   | This study            |
| NHMW 39496     | Austria: Lower Austria: Petronell-Carnuntum                | 4           | r3            | -               | -                   | -                    | -                   | This study            |
| NHMW 39436 (1) | Austria: Lower Austria: Sommerein                          | 4           | r4            | r34             | 0.00                | 0.85                 | -                   | This study            |
| NHMW 37311     | Austria: Lower Austria: St. Pöllen                         | 4           | r3            | r10             | 0.03                | 0.96                 | 0.10                | This study            |
| NHMW 38810     | Austria: Lower Austria: St. Valentin                       | 4           | r3            | r10             | 0.00                | 0.98                 | 0.10                | This study            |
| NHMW 40084 (1) | Austria: Lower Austria: Stöptenbrunn                       | 4           | r3            | r5              | 0.00                | 0.97                 | 0.08                | This study            |
| ZFMK 73648     | Austria: Styria: Admont/Gesäuse                            | 3           | r4            | r5              | 0.00                | 0.96                 | 0.06                | Kindler et al. (2013) |
| NHMW 36994     | Austria: Styria: Ebbswald                                  | 4           | r4            | r34             | 0.00                | 0.74                 | -                   | This study            |
| MTD T 14544    | Austria: Styria: Graz                                      | 4           | r4            | -               | -                   | -                    | -                   | This study            |
| MTD T 14539    | Austria: Styria: Seewiesen                                 | 4           | r4            | r41             | 0.02                | 0.60                 | -                   | This study            |
| NHMW 39266 (3) | Austria: Upper Austria: between Stadl Paura and Stadl Trum | 4           | r4            | r35             | 0.00                | 0.84                 | -                   | This study            |
| NHMW 38946     | Austria: Upper Austria: Maunhausen                         | 4           | r3            | r21             | 0.00                | 0.99                 | 0.05                | This study            |
| NHMW 36405 (1) | Austria: Upper Austria: St. Ulrich bei Steyr               | 4           | r3            | r21             | 0.00                | 0.96                 | 0.06                | This study            |
| NHMW 37422     | Austria: Upper Austria: St. Ulrich bei Steyr               | 4           | r3            | r10             | 0.00                | 0.98                 | 0.13                | This study            |
| NHMW 38038     | Austria: Upper Austria: St. Ulrich bei Steyr               | 4           | r3            | r10             | 0.00                | 0.28                 | -                   | This study            |
| NHMW 38599     | Austria: Upper Austria: St. Ulrich bei Steyr               | 3           | y1            | y5              | 0.00                | 0.99                 | 0.06                | This study            |
| NHMW 39122     | Austria: Upper Austria: St. Ulrich bei Steyr               | 3           | y1            | y5              | 0.02                | 0.95                 | 0.12                | This study            |
| NHMW 40024 (2) | Austria: Upper Austria: St. Ulrich bei Steyr               | 4           | r3            | r10             | 0.00                | 0.80                 | -                   | This study            |
| NHMW 40036 (1) | Austria: Upper Austria: St. Ulrich bei Steyr               | 3           | y1            | y5              | 0.00                | 0.83                 | -                   | This study            |
| NHMW 40036 (2) | Austria: Upper Austria: St. Ulrich bei Steyr               | 4           | r3            | r10             | 0.00                | 0.99                 | 0.08                | This study            |
| MTD T 14561    | Austria: Vienna                                            | 4           | r3            | r12             | 0.00                | 0.99                 | 0.09                | This study            |
| MTD T 14562    | Austria: Vienna                                            | 4           | r3            | r10             | 0.00                | 0.96                 | 0.04                | This study            |
| MTD T 9903     | Austria: Vienna: Danube Island                             | 4           | r3            | r26             | 0.00                | 0.94                 | -                   | Kindler et al. (2013) |
| MTD T 9904     | Austria: Vienna: Danube Island                             | 4           | r19           | r34             | 0.00                | 0.80                 | -                   | Kindler et al. (2013) |
| MTD T 9905     | Austria: Vienna: Danube Island                             | 4           | r3            | r10             | 0.00                | 0.96                 | 0.16                | Kindler et al. (2013) |
| NHMW 36284     | Austria: Vienna: Danube Island                             | 4           | r3            | -               | -                   | -                    | -                   | This study            |
| NHMW 36359     | Austria: Vienna: Danube Island                             | 4           | r3            | r10             | 0.00                | 0.94                 | -                   | This study            |
| NHMW 38557 (2) | Austria: Vienna: Hadersdorf-Weidlingau                     | 4           | r3            | r10             | 0.00                | 0.96                 | 0.08                | This study            |
| MTD T 8976     | Bosnia and Herzegovina: Maglić Mountain: Prijedor          | 4           | r7            | r32             | 0.01                | 0.39                 | -                   | Kindler et al. (2013) |
| MTD T 12836    | Bosnia and Herzegovina: near Capijina: Hutovo Blato        | 4           | r4            | r34             | 0.01                | 0.13                 | -                   | This study            |
| MTD T 12837    | Bosnia and Herzegovina: near Capijina: Hutovo Blato        | 5           | 18            | -               | 0.00                | 0.02                 | -                   | This study            |
| MTD T 8644     | Bosnia and Herzegovina: near Capijina: Hutovo Blato        | 5           | 12            | 112             | 0.00                | 0.03                 | -                   | Kindler et al. (2013) |
| MTD T 8645     | Bosnia and Herzegovina: near Capijina: Hutovo Blato        | 5           | 12            | 112             | 0.01                | 0.05                 | -                   | Kindler et al. (2013) |
| MTD D #6092    | Bulgaria: Albena                                           | 3           | -             | HF680126        | 0.01                | 0.23                 | -                   | Kindler et al. (2013) |
| MTD T 10951    | Bulgaria: Aeklitino                                        | 7           | g21           | g27             | 0.01                | 0.07                 | -                   | This study            |
| ZFMK 59679     | Bulgaria: Aeklitino                                        | 7           | g21           | g24             | 0.00                | 0.07                 | -                   | Kindler et al. (2013) |
| MTD T 10939    | Bulgaria: Aconigrad: Aconitza river                        | 7           | g21           | g24             | 0.01                | 0.04                 | -                   | This study            |
| MTD T 10953    | Bulgaria: between Pizemovo and Primesko                    | 7           | g26           | -               | 0.00                | 0.05                 | -                   | This study            |
| MTD T 10954    | Bulgaria: between Pizemovo and Primesko                    | 7           | g21           | g210            | 0.01                | 0.02                 | -                   | This study            |
| MTD T 8653     | Bulgaria: Bezhanovo                                        | 4           | r3            | r3              | 0.01                | 0.31                 | -                   | Kindler et al. (2013) |
| MTD T 10952    | Bulgaria: Bosna pass                                       | 7           | g210          | g22             | 0.01                | 0.02                 | -                   | This study            |
| MTD T 10948    | Bulgaria: Brashlyan                                        | 7           | g22           | g24             | 0.00                | 0.10                 | -                   | This study            |
| MTD T 10949    | Bulgaria: Brashlyan                                        | 7           | g210          | g22             | 0.00                | 0.14                 | -                   | This study            |
| MTD T 8654     | Bulgaria: Etropole                                         | 4           | r4            | r34             | 0.02                | 0.26                 | -                   | Kindler et al. (2013) |
| MTD T 18923    | Bulgaria: Levunovo                                         | 3           | y20           | y30             | 0.01                | 0.45                 | -                   | Kindler et al. (2013) |

• Table S1 continued

| Voucher     | Locality                                           | mtDNA data  |               |                 | Microsatellite data |                      |                     | Reference             |
|-------------|----------------------------------------------------|-------------|---------------|-----------------|---------------------|----------------------|---------------------|-----------------------|
|             |                                                    | mtDNA clade | ND4 haplotype | cyt b haplotype | First STRUCTURE run | Second STRUCTURE run | Third STRUCTURE run |                       |
| MTD T 18924 | Bulgaria: Lovenovo                                 | 3           | y15           | y10             | 0.00                | 0.08                 | -                   | Kindler et al. (2013) |
| MTD T 10940 | Bulgaria: Liljanovo                                | 3           | y20           | y29             | 0.00                | 0.55                 | -                   | This study            |
| MTD T 14446 | Bulgaria: Lozorets                                 | 7           | gy1           | gy29            | 0.01                | 0.02                 | -                   | This study            |
| MTD T 9321  | Bulgaria: Malko Gradšte (pass)                     | 7           | gy1           | gy4             | 0.00                | 0.53                 | -                   | Kindler et al. (2013) |
| MTD D 29984 | Bulgaria: Mlačin                                   | 4           | r4            | r34             | -                   | -                    | -                   | Kindler et al. (2013) |
| BEV.T4054   | Bulgaria: Novo selo                                | 3           | y15           | y10             | 0.01                | 0.29                 | -                   | This study            |
| MTD T 9910  | Bulgaria: Novo Selo                                | 3           | -             | y10             | 0.01                | 0.29                 | -                   | Kindler et al. (2013) |
| MTD T 10946 | Bulgaria: Pass to Silvarovo                        | 7           | gy10          | gy2             | 0.01                | 0.05                 | -                   | This study            |
| MTD T 9012  | Bulgaria: Pejo-Zavecov                             | 3           | y18           | y30             | 0.02                | 0.36                 | -                   | Kindler et al. (2013) |
| MTD T 9013  | Bulgaria: Pejo-Zavecov                             | 3           | y20           | y29             | 0.00                | 0.03                 | -                   | Kindler et al. (2013) |
| MTD T 12965 | Bulgaria: Ponorie                                  | 7           | gy4           | gy11            | 0.00                | 0.03                 | -                   | This study            |
| MTD T 10941 | Bulgaria: Primorsko                                | 7           | gy5           | gy6             | 0.00                | 0.31                 | -                   | This study            |
| MTD T 10943 | Bulgaria: Primorsko                                | 7           | gy1           | gy4             | 0.03                | 0.04                 | -                   | This study            |
| MTD T 9318  | Bulgaria: Ropotamo                                 | 7           | gy9           | gy2             | 0.00                | 0.04                 | -                   | Kindler et al. (2013) |
| MTD T 9319  | Bulgaria: Ropotamo                                 | 7           | gy5           | gy6             | 0.11                | -                    | -                   | Kindler et al. (2013) |
| MTD T 10942 | Bulgaria: Ropotamo                                 | 7           | gy9           | gy2             | 0.01                | 0.12                 | -                   | This study            |
| MTD D 19566 | Bulgaria: Sandanski                                | 3           | y20           | y30             | 0.01                | 0.27                 | -                   | Kindler et al. (2013) |
| MTD D 20867 | Bulgaria: Sandanska Bistrica Valley                | 3           | HF679836      | HF680138        | 0.01                | 0.52                 | -                   | Kindler et al. (2013) |
| MTD T 8649  | Bulgaria: Shipka pass                              | 7           | HF679838      | gy4             | 0.01                | 0.47                 | -                   | Kindler et al. (2013) |
| MTD T 14453 | Bulgaria: Svistov                                  | 4           | r4            | r31             | 0.01                | 0.43                 | -                   | This study            |
| MTD T 14454 | Bulgaria: Svistov                                  | 4           | r4            | r34             | 0.00                | 0.96                 | 0.31                | This study            |
| MTD T 10920 | Bulgaria: Zvezdets                                 | 7           | gy3           | gy5             | 0.01                | 0.05                 | -                   | This study            |
| ZFMK 54795  | Croatia: 25 km N Rijeka: Gomance                   | 4           | r18           | -               | 0.00                | 0.05                 | -                   | This study            |
| ZFMK 92199  | Croatia: Brankovec                                 | 4           | r4            | r34             | 0.01                | 0.21                 | -                   | Kindler et al. (2013) |
| ZFMK 91558  | Croatia: Intra: NE Lupačev                         | 4           | r17           | r60             | 0.01                | 0.10                 | -                   | Kindler et al. (2013) |
| MTD D 32031 | Croatia: Intra: Rovinj                             | 4           | r4            | r34             | 0.02                | 0.02                 | -                   | Kindler et al. (2013) |
| MTD D 32032 | Croatia: Intra: Rovinj                             | 4           | r4            | r34             | 0.00                | 0.05                 | -                   | Kindler et al. (2013) |
| MTD D 20790 | Croatia: Kik                                       | 4           | r16           | HF679930        | 0.00                | 0.06                 | -                   | Kindler et al. (2013) |
| MTD T 11596 | Croatia: Kik                                       | 4           | r16           | r34             | 0.01                | 0.21                 | -                   | This study            |
| MTD T 11597 | Croatia: Kik                                       | 4           | r16           | r34             | 0.00                | 0.43                 | -                   | This study            |
| MTD T 13249 | Croatia: Kik                                       | 4           | r16           | r34             | 0.01                | 0.02                 | -                   | This study            |
| MTD T 13250 | Croatia: Kik                                       | 4           | r16           | r34             | 0.00                | 0.04                 | -                   | This study            |
| MTD T 13251 | Croatia: Kik                                       | 4           | r18           | r62             | 0.01                | 0.08                 | -                   | This study            |
| ZFMK 49044  | Croatia: Kik: N Kik                                | 4           | r16           | -               | 0.00                | 0.04                 | -                   | Kindler et al. (2013) |
| ZFMK 54766  | Croatia: Kuk: Panat                                | 4           | r16           | -               | 0.00                | 0.08                 | -                   | Kindler et al. (2013) |
| ZFMK 54709  | Croatia: near Šibenik: Krka falls                  | 4           | r11           | -               | 0.00                | 0.08                 | -                   | Kindler et al. (2013) |
| NHMW 37852  | Croatia: Pag: Vlaisci                              | 4           | r4            | r35             | 0.00                | 0.04                 | -                   | This study            |
| ZFMK 54707  | Croatia: Plitvice                                  | 4           | r16           | r34             | -                   | -                    | -                   | Kindler et al. (2013) |
| MTD T 11112 | Croatia: Rab: Lopar                                | 4           | r4            | r34             | 0.00                | 0.02                 | -                   | This study            |
| MTD T 11211 | Croatia: Rab: Lopar                                | 4           | r4            | r34             | 0.00                | 0.04                 | -                   | This study            |
| BEV.1242    | Croatia: southern edge of the Neretva Delta        | 5           | r15           | -               | 0.01                | 0.02                 | -                   | This study            |
| MTD T 9873  | Croatia: Vransko Jezero                            | 4           | r16           | -               | 0.00                | 0.02                 | -                   | Kindler et al. (2013) |
| ZFMK 76296  | Cyprus: Larnaka: Paralimni                         | 7           | gy11          | -               | 0.01                | 0.01                 | -                   | Kindler et al. (2013) |
| MTD T 11876 | Cyprus: Xyliftos dam                               | 7           | gy11          | -               | 0.01                | 0.01                 | -                   | This study            |
| MTD T 11808 | Cyprus: Xyliftos dam                               | 7           | gy11          | gy3             | 0.00                | 0.01                 | -                   | This study            |
| MTD T 11809 | Cyprus: Xyliftos dam                               | 7           | gy11          | gy3             | 0.00                | 0.01                 | -                   | This study            |
| MTD T 11910 | Cyprus: Xyliftos dam                               | 7           | gy11          | gy3             | 0.01                | 0.01                 | -                   | This study            |
| MTD T 11911 | Cyprus: Xyliftos dam                               | 7           | gy11          | gy3             | 0.01                | 0.01                 | -                   | This study            |
| MTD T 11912 | Cyprus: Xyliftos dam                               | 7           | gy6           | gy9             | 0.01                | 0.03                 | -                   | This study            |
| MTD T 11913 | Cyprus: Xyliftos dam                               | 7           | gy6           | gy9             | 0.00                | 0.03                 | -                   | This study            |
| MTD T 11914 | Cyprus: Xyliftos dam                               | 7           | gy6           | gy9             | 0.00                | 0.04                 | -                   | This study            |
| MTD T 11915 | Cyprus: Xyliftos dam                               | 7           | gy6           | gy9             | 0.01                | 0.02                 | -                   | This study            |
| MTD T 11916 | Cyprus: Xyliftos dam                               | 7           | gy6           | gy9             | 0.00                | 0.08                 | -                   | This study            |
| MTD T 11917 | Cyprus: Xyliftos dam                               | 7           | gy6           | gy9             | 0.00                | 0.09                 | -                   | This study            |
| MTD T 11982 | Cyprus: Xyliftos dam                               | 7           | gy11          | gy3             | 0.00                | 0.01                 | -                   | This study            |
| MTD T 11984 | Cyprus: Xyliftos dam                               | 7           | gy11          | -               | 0.01                | 0.01                 | -                   | This study            |
| MTD T 11985 | Cyprus: Xyliftos dam                               | 7           | -             | gy3             | 0.01                | 0.01                 | -                   | This study            |
| MTD T 12084 | Cyprus: Xyliftos dam                               | 7           | -             | gy3             | 0.01                | 0.01                 | -                   | This study            |
| MTD T 12085 | Cyprus: Xyliftos dam                               | 7           | gy11          | gy3             | 0.01                | 0.01                 | -                   | This study            |
| MTD T 12087 | Cyprus: Xyliftos dam                               | 7           | gy11          | gy3             | 0.01                | 0.01                 | -                   | This study            |
| MTD T 12089 | Cyprus: Xyliftos dam                               | 7           | gy11          | gy3             | 0.01                | 0.01                 | -                   | This study            |
| MTD T 12090 | Cyprus: Xyliftos dam                               | 7           | gy11          | gy3             | 0.01                | 0.01                 | -                   | This study            |
| MTD T 12094 | Cyprus: Xyliftos dam                               | 7           | gy11          | gy3             | 0.01                | 0.01                 | -                   | This study            |
| MTD T 12095 | Cyprus: Xyliftos dam                               | 7           | gy11          | gy3             | 0.01                | 0.01                 | -                   | This study            |
| MTD T 12096 | Cyprus: Xyliftos dam                               | 7           | gy11          | gy3             | 0.01                | 0.01                 | -                   | This study            |
| MTD T 14830 | Cyprus: Xyliftos dam                               | 7           | gy11          | gy3             | 0.01                | 0.01                 | -                   | This study            |
| ZFMK 54318  | Cyprus: Xyliftos dam                               | 7           | -             | gy3             | 0.01                | 0.01                 | -                   | Kindler et al. (2013) |
| ZFMK 61144  | Cyprus: Xyliftos dam                               | 7           | -             | gy3             | 0.01                | 0.01                 | -                   | Kindler et al. (2013) |
| ZFMK 66524  | Cyprus: Xyliftos dam                               | 7           | -             | gy3             | 0.01                | 0.01                 | -                   | Kindler et al. (2013) |
| MTD T 9882  | Czech Republic: Bartolovice                        | 4           | r1            | -               | 0.00                | 0.61                 | -                   | Kindler et al. (2013) |
| MTD T 9878  | Czech Republic: Bítovna                            | 4           | r3            | -               | 0.01                | 0.94                 | -                   | Kindler et al. (2013) |
| MTD T 9579  | Czech Republic: between Horatic and Rada           | 4           | r3            | r10             | 0.00                | 0.77                 | -                   | Kindler et al. (2013) |
| MTD T 9580  | Czech Republic: between Horatic and Rada           | 4           | r4            | r34             | 0.00                | 0.94                 | -                   | Kindler et al. (2013) |
| MTD T 12955 | Czech Republic: Čápcov                             | 4           | r4            | r34             | 0.00                | 0.98                 | 0.22                | This study            |
| MTD T 8963  | Czech Republic: České Budějovice                   | 4           | r31           | r3              | 0.00                | 0.98                 | 0.19                | Kindler et al. (2013) |
| MTD T 9886  | Czech Republic: Chřibý Mountains: Halenkovice      | 4           | r4            | r34             | 0.00                | 0.93                 | -                   | Kindler et al. (2013) |
| MTD T 9880  | Czech Republic: Chřibý Mountains: Janovice         | 4           | r4            | -               | 0.00                | 0.95                 | 0.09                | Kindler et al. (2013) |
| MTD T 9885  | Czech Republic: Chřibý Mountains: Janovice         | 4           | -             | r34             | 0.00                | 0.70                 | -                   | Kindler et al. (2013) |
| MTD T 9882  | Czech Republic: Chřibý Mountains: Kudlovice        | 4           | r4            | -               | 0.00                | 0.97                 | 0.16                | Kindler et al. (2013) |
| MTD T 8974  | Czech Republic: Chřibý Mountains: Kudlovice dolina | 4           | r32           | r3              | 0.00                | 0.61                 | -                   | Kindler et al. (2013) |
| MTD T 9879  | Czech Republic: Chřibý Mountains: Saláň            | 4           | r4            | -               | 0.00                | 0.92                 | -                   | Kindler et al. (2013) |
| MTD T 13009 | Czech Republic: Dlouhá Loučka                      | 4           | r4            | r34             | -                   | -                    | -                   | This study            |
| MTD T 8636  | Czech Republic: Dolní Lišná                        | 4           | r3            | -               | -                   | -                    | -                   | Kindler et al. (2013) |
| MTD T 8642  | Czech Republic: Dolní Lišná                        | 4           | r3            | r10             | 0.00                | 0.97                 | 0.64                | Kindler et al. (2013) |
| MTD T 10626 | Czech Republic: Dolní Marketávice                  | 4           | r4            | r34             | 0.01                | 0.97                 | 0.37                | This study            |
| MTD T 14862 | Czech Republic: Dražovice                          | 4           | r4            | r34             | 0.00                | 0.99                 | 0.20                | This study            |
| MTD T 12781 | Czech Republic: Fojtka                             | 4           | r3            | r16             | 0.00                | 0.99                 | 0.50                | This study            |
| MTD T 8962  | Czech Republic: Heřmanovice                        | 4           | r4            | r34             | 0.00                | 0.97                 | 0.22                | Kindler et al. (2013) |
| MTD T 8964  | Czech Republic: Heřmanovice                        | 4           | r4            | r34             | 0.00                | 0.98                 | 0.26                | Kindler et al. (2013) |
| MTD T 8972  | Czech Republic: Kamýk: Litoměřice                  | 4           | r3            | r30             | 0.00                | 0.98                 | 0.17                | Kindler et al. (2013) |
| MTD T 8634  | Czech Republic: Kamýk: Olšiny                      | 4           | r4            | r34             | 0.00                | 0.55                 | -                   | Kindler et al. (2013) |
| MTD T 14863 | Czech Republic: Klíčov                             | 4           | r4            | r34             | 0.00                | 0.99                 | 0.14                | This study            |
| MTD T 8966  | Czech Republic: Kokořín                            | 4           | r3            | r10             | 0.00                | 0.99                 | 0.35                | Kindler et al. (2013) |
| MTD T 8965  | Czech Republic: Kokořínský Důl                     | 4           | r4            | r34             | 0.00                | 0.98                 | 0.77                | Kindler et al. (2013) |
| MTD T 8971  | Czech Republic: Koudrnice: Litoměřice              | 4           | r3            | r10             | 0.00                | 0.99                 | 0.60                | Kindler et al. (2013) |
| MTD T 13549 | Czech Republic: Lučina                             | 4           | r3            | r10             | 0.00                | 0.95                 | 0.26                | This study            |
| MTD T 9881  | Czech Republic: Moutavský Písk                     | 4           | r4            | -               | 0.00                | 0.97                 | 0.20                | Kindler et al. (2013) |
| MTD T 14451 | Czech Republic: Na Plačbě, Hradec Králové          | 4           | r3            | -               | 0.00                | 0.96                 | 0.44                | This study            |
| MTD T 14756 | Czech Republic: Narodní park Poodří                | 4           | r4            | r34             | 0.00                | 0.97                 | 0.09                | This study            |
| MTD T 13010 | Czech Republic: Olomouc: Cennov                    | 4           | r8            | r34             | 0.00                | 0.96                 | 0.33                | This study            |
| MTD T 13007 | Czech Republic: Písekout                           | 4           | r4            | r34             | 0.00                | 0.96                 | 0.31                | This study            |
| MTD T 14755 | Czech Republic: Pouzdřanský rybník                 | 4           | r4            | r34             | 0.00                | 0.96                 | 0.09                | This study            |
| MTD T 14861 | Czech Republic: Sadská                             | 4           | r3            | r10             | 0.00                | 0.99                 | 0.57                | This study            |
| MTD T 8643  | Czech Republic: Staré Hamry                        | 4           | r3            | r10             | 0.00                | 0.98                 | 0.13                | Kindler et al. (2013) |
| MTD T 14769 | Czech Republic: Staré Město nad Metují             | 4           | r2            | r10             | 0.00                | 0.99                 | 0.72                | This study            |
| MTD T 12794 | Czech Republic: Stížá nad Ohří                     | 3           | y1            | -               | -                   | -                    | -                   | This study            |
| MTD T 13008 | Czech Republic: Vlárský průmysk                    | 4           | r3            | r22             | -                   | -                    | -                   | This study            |
| MTD T 8969  | Czech Republic: Vysoká: Jihlava                    | 4           | r3            | r9              | 0.00                | 0.97                 | 0.12                | Kindler et al. (2013) |
| MTD T 8970  | Czech Republic: Vysoká: Jihlava                    | 4           | r3            | r10             | 0.00                | 0.97                 | 0.14                | Kindler et al. (2013) |
| MTD T 8961  | Czech Republic: Zlaté Hory                         | 4           | r2            | r10             | 0.00                | 0.97                 | 0.27                | Kindler et al. (2013) |
| MTD T 9652  | Denmark: Funen: NNW Svendborg                      | 3           | y1            | y1              | 0.01                | 0.99                 | 0.95                | Kindler et al. (2013) |
| MTD T 9653  | Denmark: Funen: NNW Svendborg                      | 3           | y1            | y1              | 0.03                | 0.98                 | 0.77                | Kindler et al. (2013) |
| MTD T 9654  | Denmark: Funen: NNW Svendborg                      | 3           | y1            | y1              | 0.01                | 0.98                 | 0.80                | Kindler et al. (2013) |
| MTD T 9655  | Denmark: Funen: NNW Svendborg                      | 3           | y1            | y1              | 0.00                | 0.99                 | 0.81                | Kindler et al. (2013) |
| MTD T 9913  | Denmark: Jutland: SE Gammel Rye                    | 3           | y1            | y38             | 0.02                | 0.98                 | 0.95                | Kindler et al. (2013) |
| MTD T 9914  | Denmark: Jutland: SE Gammel Rye                    | 3           | y1            | y1              | 0.18                | -                    | -                   | Kindler et al. (2013) |
| MTD T 9915  | Denmark: Jutland: SE Gammel Rye                    | 3           | y1            | y1              | 0.05                | 0.98                 | 0.95                | Kindler et al. (2013) |
| MTD T 9916  | Denmark: Jutland: SE Skanderborg                   | 3           | y1            | y1              | 0.10                | -                    | -                   | Kindler et al. (2013) |
| MTD T 14559 | Denmark: Langeland: Hov                            | 3           | y1            | y37             | 0.01                | 0.99                 | 0.95                | This study            |
| MTD T 9651  | Denmark: Langeland: S Trankær                      | 3           | y1            | y17             | 0.01                | 0.97                 | 0.93                | Kindler et al. (2013) |
| MTD T 10918 | Denmark: Zealand: 6 km W Køge                      | 3           | y30           | y1              | 0.01                | 0.99                 | 0.92                | Kindler et al. (2014) |
| ZMH R09201  | Denmark: Zealand: Bornholm                         | 3           | y20           | -               | 0.00                | 0.99                 | 0.94                | This study            |
| ZMH R09021  | Denmark: Zealand: Fredensborg                      | 3           | y20           | -               | -                   | -                    | -                   | This study            |
| ZMH R09022  | Denmark: Zealand: Fredensborg                      | 3           | y20           | -               | -                   | -                    | -                   | This study            |

• Table S1 continued

| Voucher     | Locality                                                                    | mtDNA data  |               |                 | Microsatellite data |                      |                     | Reference             |
|-------------|-----------------------------------------------------------------------------|-------------|---------------|-----------------|---------------------|----------------------|---------------------|-----------------------|
|             |                                                                             | mtDNA clade | ND4 haplotype | cyt b haplotype | First STRUCTURE run | Second STRUCTURE run | Third STRUCTURE run |                       |
| ZMH R09204  | Denmark: Zealand: Fredensborg                                               | 3           | y20           | -               | 0.04                | 0.98                 | 0.95                | This study            |
| ZMH R09205  | Denmark: Zealand: Fredensborg                                               | 3           | y20           | -               | -                   | -                    | -                   | This study            |
| ZMH R09206  | Denmark: Zealand: Fredensborg                                               | 3           | y20           | -               | -                   | -                    | -                   | This study            |
| ZMH R09210  | Denmark: Zealand: Fredensborg                                               | 3           | y20           | -               | -                   | -                    | -                   | This study            |
| ZMH R09211  | Denmark: Zealand: Fredensborg                                               | 3           | y20           | -               | -                   | -                    | -                   | This study            |
| ZMH R09020  | Denmark: Zealand: Gribskov forest                                           | 3           | y20           | -               | -                   | -                    | -                   | This study            |
| ZMH R09030  | Denmark: Zealand: Gribskov forest                                           | 3           | y20           | -               | 0.00                | 0.36                 | -                   | This study            |
| ZMH R09055  | Denmark: Zealand: Gribskov forest                                           | 3           | y20           | -               | -                   | -                    | -                   | This study            |
| MTD T 14546 | Denmark: Zealand: Høje: Vaserne                                             | 3           | y1            | y39             | 0.00                | 0.99                 | 0.87                | This study            |
| MTD T 14547 | Denmark: Zealand: Høje: Vaserne                                             | 3           | y1            | y40             | 0.11                | -                    | -                   | This study            |
| MTD T 14548 | Denmark: Zealand: Høje: Vaserne                                             | 3           | y1            | y1              | 0.00                | 0.99                 | 0.95                | This study            |
| MTD T 14751 | Denmark: Zealand: N Copenhagen: Jagersborg Dyrehave                         | 3           | y1            | y1              | 0.21                | -                    | -                   | This study            |
| MTD T 9649  | Denmark: Zealand: N Præstø: Feddet                                          | 3           | y34           | y1              | 0.01                | 0.98                 | 0.95                | Kindler et al. (2013) |
| MTD T 9269  | Denmark: Zealand: S Borup                                                   | 3           | y7            | y1              | 0.00                | 0.99                 | 0.94                | Kindler et al. (2013) |
| MTD T 9270  | Denmark: Zealand: S Borup                                                   | 3           | y7            | y1              | 0.00                | 0.99                 | 0.95                | Kindler et al. (2013) |
| MTD T 9271  | Denmark: Zealand: S Borup                                                   | 3           | y7            | -               | 0.00                | 0.99                 | 0.95                | Kindler et al. (2013) |
| MTD T 14550 | Denmark: Zealand: S Hillerød: Bøstingend Mose                               | 3           | y1            | y40             | 0.04                | 0.99                 | 0.94                | This study            |
| MTD T 14551 | Denmark: Zealand: S Hillerød: Bøstingend Mose                               | 3           | y19           | y1              | 0.00                | 0.99                 | 0.91                | This study            |
| MTD T 14552 | Denmark: Zealand: S Hillerød: Bøstingend Mose                               | 3           | y1            | y1              | 0.02                | 0.99                 | 0.94                | This study            |
| MTD T 14553 | Denmark: Zealand: S Hillerød: Bøstingend Mose                               | 3           | y24           | y1              | 0.01                | 0.99                 | 0.87                | This study            |
| MTD T 14554 | Denmark: Zealand: S Hillerød: Bøstingend Mose                               | 3           | y1            | y40             | 0.00                | 0.99                 | 0.93                | This study            |
| MTD T 14555 | Denmark: Zealand: S Hillerød: Bøstingend Mose                               | 3           | y1            | y1              | 0.00                | 0.99                 | 0.94                | This study            |
| MTD T 14556 | Denmark: Zealand: S Hillerød: Bøstingend Mose                               | 3           | y1            | y40             | 0.02                | 0.99                 | 0.95                | This study            |
| MTD T 14557 | Denmark: Zealand: S Hillerød: Bøstingend Mose                               | 3           | y1            | y1              | 0.04                | 0.99                 | 0.94                | This study            |
| MTD T 14549 | Denmark: Zealand: S Hillerød: Brodskov                                      | 3           | y1            | y40             | 0.01                | 0.99                 | 0.95                | This study            |
| MTD T 14558 | Denmark: Zealand: S Hillerød: near Lillerød: Ravnsholt                      | 3           | y1            | y1              | 0.00                | 0.99                 | 0.89                | This study            |
| MTD T 14341 | Denmark: Zealand: W Koge                                                    | 3           | y1            | y1              | 0.00                | 0.99                 | 0.94                | This study            |
| MTD T 14342 | Denmark: Zealand: W Koge                                                    | 3           | y1            | y1              | 0.00                | 0.99                 | 0.91                | This study            |
| MTD T 9648  | Denmark: Zealand: W Koge                                                    | 3           | y1            | y1              | 0.06                | -                    | -                   | Kindler et al. (2013) |
| MTD T 11583 | Finland: Åland                                                              | 3           | y1            | y25             | 0.01                | 0.55                 | -                   | Kindler et al. (2014) |
| MTD T 11584 | Finland: Åland                                                              | 3           | y1            | y5              | 0.00                | 0.99                 | 0.81                | Kindler et al. (2014) |
| MTD T 11586 | Finland: Åland                                                              | 3           | y5            | y5              | 0.01                | 0.80                 | -                   | Kindler et al. (2014) |
| MTD T 11589 | Finland: Åland: Finström                                                    | 3           | y1            | y5              | 0.00                | 0.99                 | 0.93                | Kindler et al. (2014) |
| MTD T 11587 | Finland: Åland: Lemland: Bergö                                              | 3           | y5            | y5              | 0.01                | 0.41                 | -                   | Kindler et al. (2014) |
| MTD T 11588 | Finland: Åland: Lemland: Näätö                                              | 3           | y1            | y5              | 0.03                | 0.69                 | -                   | Kindler et al. (2014) |
| MTD T 11591 | Finland: Eastern Finland: Savonlinna: Hemenniemi                            | 8           | gn1           | gn4             | 0.00                | 0.02                 | -                   | Kindler et al. (2014) |
| MTD T 11585 | Finland: Southern Finland: Hanko                                            | 8           | gn6           | gn11            | 0.00                | 0.05                 | -                   | Kindler et al. (2014) |
| MTD T 11590 | Finland: Western Finland: near Kaarina                                      | 8           | gn1           | gn5             | 0.00                | 0.15                 | -                   | Kindler et al. (2014) |
| MTD T 12985 | Former Yugoslav Republic of Macedonia: Crkvin                               | 3           | y23           | y29             | 0.01                | 0.05                 | -                   | This study            |
| MTD T 12986 | Former Yugoslav Republic of Macedonia: Dojran Lake: Mrduja                  | 3           | y15           | -               | 0.01                | 0.25                 | -                   | This study            |
| MTD T 12987 | Former Yugoslav Republic of Macedonia: Dojran Lake: Mrduja                  | 3           | y17           | y10             | 0.05                | 0.15                 | -                   | This study            |
| MTD T 12988 | Former Yugoslav Republic of Macedonia: Dojran Lake: Mrduja                  | 3           | y21           | -               | 0.17                | -                    | -                   | This study            |
| MTD T 12989 | Former Yugoslav Republic of Macedonia: Dojran Lake: Mrduja                  | 3           | y15           | y11             | 0.00                | 0.30                 | -                   | This study            |
| MTD T 12994 | Former Yugoslav Republic of Macedonia: Dolna Marka                          | 5           | 12            | 110             | 0.00                | 0.41                 | -                   | This study            |
| BEV T4065   | Former Yugoslav Republic of Macedonia: Jakubica Mountains                   | 3           | y15           | y10             | 0.10                | -                    | -                   | This study            |
| MTD T 9911  | Former Yugoslav Republic of Macedonia: Jakubica Mountains                   | 3           | y15           | y10             | 0.10                | -                    | -                   | Kindler et al. (2013) |
| MTD T 12992 | Former Yugoslav Republic of Macedonia: Lake Prespa: Asamiti                 | 5           | 111           | 19              | 0.03                | 0.04                 | -                   | This study            |
| MTD T 12993 | Former Yugoslav Republic of Macedonia: Lake Prespa: Pokrovnik               | 3           | y12           | -               | 0.00                | 0.28                 | -                   | This study            |
| MTD T 12991 | Former Yugoslav Republic of Macedonia: Lake Prespa: Prezir                  | 5           | 12            | -               | 0.00                | 0.17                 | -                   | This study            |
| MTD T 13000 | Former Yugoslav Republic of Macedonia: Lake Prespa: Stenje                  | 5           | 111           | 110             | 0.15                | -                    | -                   | This study            |
| MTD T 9877  | Former Yugoslav Republic of Macedonia: National Park Galčica                | 5           | 112           | 112             | 0.01                | 0.57                 | -                   | Kindler et al. (2013) |
| MTD T 14447 | Former Yugoslav Republic of Macedonia: Nov Dojran                           | 3           | y15           | y10             | 0.02                | 0.07                 | -                   | This study            |
| MTD T 9909  | Former Yugoslav Republic of Macedonia: Porodin                              | 5           | 110           | 110             | 0.03                | 0.08                 | -                   | Kindler et al. (2013) |
| MTD T 12990 | Former Yugoslav Republic of Macedonia: Star Dojran                          | 3           | y15           | y10             | 0.12                | -                    | -                   | This study            |
| MTD T 8633  | Former Yugoslav Republic of Macedonia: Stenje                               | 5           | 12            | 110             | 0.06                | -                    | -                   | Kindler et al. (2013) |
| BEV.1690    | France: Alpes-de-Haute-Provence: Clumanc                                    | E           | h7            | -               | 0.99                | -                    | -                   | Pokrant et al. (2016) |
| ZFMK 54711  | France: Ardèche: 10 km N Tournon-sur-Rhône                                  | E           | h1            | h1              | 1.00                | -                    | -                   | Kindler et al. (2013) |
| BEV.6430    | France: Aveyron: Peyrussac-le-Roc                                           | E           | h1            | -               | 1.00                | -                    | -                   | Pokrant et al. (2016) |
| MTD T 10091 | France: Bas-Rhin: Strasbourg                                                | E           | h1            | -               | 1.00                | -                    | -                   | Kindler et al. (2013) |
| BEV.11494   | France: Bouches-du-Rhône: Aubagne                                           | E           | h1            | -               | -                   | -                    | -                   | This study            |
| BEV.9397    | France: Bouches-du-Rhône: between Fos-sur-Mer and Pont-Saint-Louis-du-Rhône | E           | h1            | -               | 1.00                | -                    | -                   | Pokrant et al. (2016) |
| ZFMK 54712  | France: Bouches-du-Rhône: Camargue                                          | E           | h1            | -               | 0.98                | -                    | -                   | Kindler et al. (2013) |
| BEV.6425    | France: Bouches-du-Rhône: Camargue: Clos de Lange                           | E           | h1            | -               | 1.00                | -                    | -                   | Pokrant et al. (2016) |
| BEV.284     | France: Bouches-du-Rhône: Camargue: Marais du Grenouillet                   | E           | h1            | -               | 1.00                | -                    | -                   | Pokrant et al. (2016) |
| ZMH R07158  | France: Bouches-du-Rhône: Camargue: near Fiafouse                           | E           | h1            | -               | -                   | -                    | -                   | This study            |
| BEV.9398    | France: Bouches-du-Rhône: Camargue: Salin de Badon                          | E           | h1            | -               | -                   | -                    | -                   | This study            |
| ZMH R07572  | France: Bouches-du-Rhône: Camargue: Salin de Badon                          | E           | h1            | h1              | 0.98                | -                    | -                   | Pokrant et al. (2016) |
| ZMH R07573  | France: Bouches-du-Rhône: Camargue: Salin de Badon                          | E           | h1            | h1              | 0.99                | -                    | -                   | Pokrant et al. (2016) |
| ZMH R06950  | France: Bouches-du-Rhône: Camargue: Tour du Valat                           | E           | h1            | h1              | 0.95                | -                    | -                   | Pokrant et al. (2016) |
| ZMH R06951  | France: Bouches-du-Rhône: Camargue: Tour du Valat                           | E           | h1            | h1              | 1.00                | -                    | -                   | Pokrant et al. (2016) |
| ZMH R06952  | France: Bouches-du-Rhône: Camargue: Tour du Valat                           | E           | h1            | h1              | 1.00                | -                    | -                   | Pokrant et al. (2016) |
| ZMH R06997  | France: Bouches-du-Rhône: Camargue: Tour du Valat                           | E           | h1            | -               | 0.98                | -                    | -                   | Pokrant et al. (2016) |
| ZMH R07062  | France: Bouches-du-Rhône: Camargue: Tour du Valat                           | E           | h1            | h1              | 1.00                | -                    | -                   | Pokrant et al. (2016) |
| ZFMK 54710  | France: Bouches-du-Rhône: Saint-Martin-de-Crau                              | E           | h1            | h1              | 0.98                | -                    | -                   | Kindler et al. (2013) |
| BEV.9401    | France: Bouches-du-Rhône: Saint-Martin-de-Crau: Mas de Pernes               | E           | h1            | -               | 1.00                | -                    | -                   | Pokrant et al. (2016) |
| MTD T 11950 | France: Deux-Sèvres: near Niort                                             | E           | h1            | h9              | 0.99                | -                    | -                   | Pokrant et al. (2016) |
| BEV.11533   | France: Gard: near Alzon: Col de la Barrière                                | unknown     | -             | -               | 0.99                | -                    | -                   | Pokrant et al. (2016) |
| BEV.9400    | France: Gard: Saint-Hippolyte-de-Fort                                       | E           | h12           | -               | 0.99                | -                    | -                   | Pokrant et al. (2016) |
| BEV.19260   | France: Gironde: near Léognan: Minoy                                        | E           | h1            | h1              | 0.97                | -                    | -                   | Pokrant et al. (2016) |
| BEV.19261   | France: Gironde: near Léognan: Minoy                                        | E           | h1            | h1              | 1.00                | -                    | -                   | Pokrant et al. (2016) |
| BEV.19264   | France: Hérault: Avène dam                                                  | E           | h1            | h27             | 0.97                | -                    | -                   | Pokrant et al. (2016) |
| BEV.9049    | France: Hérault: between Le Bose and Loizans                                | E           | h1            | -               | 1.00                | -                    | -                   | Pokrant et al. (2016) |
| BEV.6428    | France: Hérault: Grabels                                                    | unknown     | -             | -               | 1.00                | -                    | -                   | Pokrant et al. (2016) |
| BEV.9029    | France: Hérault: Lansargues                                                 | E           | h1            | -               | -                   | -                    | -                   | Pokrant et al. (2016) |
| BEV.19266   | France: Hérault: Lattes                                                     | E           | h1            | h27             | 0.97                | -                    | -                   | Pokrant et al. (2016) |
| BEV.19258   | France: Hérault: Le Mas Blanc                                               | E           | h4            | h1              | 0.99                | -                    | -                   | Pokrant et al. (2016) |
| BEV.19259   | France: Hérault: Le Mas Blanc                                               | E           | h1            | h1              | -                   | -                    | -                   | Pokrant et al. (2016) |
| BEV.19565   | France: Hérault: Les Corbières                                              | E           | h1            | h1              | 0.99                | -                    | -                   | Pokrant et al. (2016) |
| BEV.6421    | France: Hérault: Massif du Caroux                                           | unknown     | -             | -               | 1.00                | -                    | -                   | Pokrant et al. (2016) |
| BEV.8499    | France: Hérault: Massif du Caroux                                           | E           | h1            | -               | 0.99                | -                    | -                   | Pokrant et al. (2016) |
| BEV.11496   | France: Hérault: Montpellier                                                | unknown     | -             | -               | 0.99                | -                    | -                   | Pokrant et al. (2016) |
| BEV.847     | France: Hérault: Saint-Pierre-de-la-Fage                                    | E           | h1            | -               | 0.99                | -                    | -                   | Pokrant et al. (2016) |
| BEV.10974   | France: Hérault: Soulagues                                                  | E           | h1            | h15             | -                   | -                    | -                   | This study            |
| BEV.9041    | France: Hérault: Trézac                                                     | unknown     | -             | -               | 0.98                | -                    | -                   | Pokrant et al. (2016) |
| BEV.9293    | France: Loire: Chelles                                                      | E           | h1            | -               | 1.00                | -                    | -                   | Pokrant et al. (2016) |
| BEV.8324    | France: Loire: Sainte-Foy-Saint-Sulpice                                     | E           | h1            | -               | 1.00                | -                    | -                   | Pokrant et al. (2016) |
| MTD T 10092 | France: Puy-de-Dôme: near Murd: Momcaux                                     | E           | h1            | -               | 1.00                | -                    | -                   | Kindler et al. (2013) |
| MTD T 11999 | France: Pyrénées-Atlantiques: St. Jean de Luz                               | E           | h1            | -               | -                   | -                    | -                   | Pokrant et al. (2016) |
| MTD T 12024 | France: Saône-et-Loire: Annot                                               | E           | h1            | -               | -                   | -                    | -                   | This study            |
| ZFMK 61095  | France: Saône-et-Loire: Annot                                               | E           | h1            | h1              | -                   | -                    | -                   | Kindler et al. (2013) |
| ZFMK 64930  | France: Saône-et-Loire: Charolles                                           | E           | h1            | h14             | -                   | -                    | -                   | Kindler et al. (2013) |
| MTD D 40712 | France: Var: N La Londe les Maîtres                                         | E           | -             | h5              | -                   | -                    | -                   | Kindler et al. (2013) |
| BEV.11530   | France: Vaucluse: Saint-Saturnin-lès-Apt                                    | E           | h1            | -               | 0.97                | -                    | -                   | Pokrant et al. (2016) |
| MTD T 11973 | Georgia: Akhaldaba                                                          | 8           | gn9           | -               | 0.00                | 0.03                 | -                   | This study            |
| MTD T 11975 | Georgia: Akhaldaba                                                          | 8           | gn11          | -               | 0.00                | 0.01                 | -                   | This study            |
| ZFMK 76546  | Georgia: Batumi                                                             | 8           | gn12          | gn14            | 0.00                | 0.02                 | -                   | Kindler et al. (2013) |
| ZFMK 73721  | Georgia: Borzhomi                                                           | 8           | gn8           | gn17            | 0.00                | 0.03                 | -                   | Kindler et al. (2013) |
| ZFMK 73722  | Georgia: Borzhomi                                                           | 8           | -             | gn10            | 0.00                | 0.03                 | -                   | Kindler et al. (2013) |
| MTD T 14770 | Georgia: Kobuleti                                                           | 8           | gn15          | gn13            | 0.01                | 0.01                 | -                   | This study            |
| MTD T 14771 | Georgia: Kobuleti                                                           | 8           | gn16          | gn10            | 0.00                | 0.01                 | -                   | This study            |
| MTD T 8960  | Georgia: Kutaisi                                                            | 8           | gn15          | gn13            | 0.00                | 0.02                 | -                   | Kindler et al. (2013) |
| MTD T 9341  | Georgia: Mtskheta                                                           | 8           | gn16          | gn10            | 0.01                | 0.02                 | -                   | Kindler et al. (2013) |
| MTD T 9339  | Georgia: N Stepunzinda                                                      | 8           | gn1           | gn1             | 0.01                | 0.02                 | -                   | Kindler et al. (2013) |
| MTD T 9340  | Georgia: N Stepunzinda                                                      | 8           | gn1           | gn19            | 0.01                | 0.02                 | -                   | Kindler et al. (2013) |
| SMNS 14510  | Germany: Baden-Württemberg: Bad Waldsee                                     | 3           | y1            | y1              | 0.02                | 0.92                 | -                   | This study            |
| SMNS 14508  | Germany: Baden-Württemberg: Bad Waldsee                                     | 3           | y1            | y1              | 0.01                | 0.98                 | 0.07                | This study            |
| SMNS 14509  | Germany: Baden-Württemberg: Bad Waldsee                                     | 3           | y1            | y1              | 0.04                | 0.71                 | -                   | This study            |
| MTD T 14844 | Germany: Baden-Württemberg: Birmen                                          | 3           | y1            | y5              | 0.34                | -                    | -                   | This study            |
| ZFMK 76777  | Germany: Baden-Württemberg: between Lonsberg and Geringen                   | 3           | -             | y5              | 0.01                | 0.96                 | 0.13                | Kindler et al. (2013) |
| MTD D 40977 | Germany: Baden-Württemberg: Böhlinger See                                   | 3           | y1            | -               | 0.20                | -                    | -                   | This study            |
| MTD T 14531 | Germany: Baden-Württemberg: Bronnbach                                       | 3           | y1            | y5              | 0.08                | -                    | -                   | This study            |
| SMNS 14503  | Germany: Baden-Württemberg: Dettenheim                                      | E           | h1            | h1              | -                   | -                    | -                   | This study            |
| MTD T 14816 | Germany: Baden-Württemberg: Freudenstadt                                    | 3           | y1            | y34             | 0.30                | -                    | -                   | This study            |
| MTD T 14835 | Germany: Baden-Württemberg: Freudenstadt                                    | 3           | y1            | -               | -                   | -                    | -                   | This study            |



• Table S1 continued

| Voucher       | Locality                                                                | mtDNA data  |               |                 | Microsatellite data |                      |                     | Reference             |
|---------------|-------------------------------------------------------------------------|-------------|---------------|-----------------|---------------------|----------------------|---------------------|-----------------------|
|               |                                                                         | mtDNA clade | ND4 haplotype | cyt b haplotype | First STRUCTURE run | Second STRUCTURE run | Third STRUCTURE run |                       |
| MTD T 14858   | Germany: Baden-Württemberg: Gansburg                                    | 3           | y1            | y5              | 0.01                | 0.99                 | 0.27                | This study            |
| MTD T 14828   | Germany: Baden-Württemberg: Hangelingen                                 | E           | h1            | b23             | 0.99                | -                    | -                   | This study            |
| SMNS 14506    | Germany: Baden-Württemberg: Herrenberg                                  | 3           | y1            | y1              | -                   | -                    | -                   | This study            |
| SMNS 14505    | Germany: Baden-Württemberg: Heren                                       | E           | h1            | h1              | 0.97                | -                    | -                   | This study            |
| SMNS 14512    | Germany: Baden-Württemberg: Kanden                                      | E           | h1            | h5              | 1.00                | -                    | -                   | This study            |
| MTD T 14874   | Germany: Baden-Württemberg: Kappel-Grafenhausen                         | E           | h1            | h1              | 1.00                | -                    | -                   | This study            |
| MTD T 14837   | Germany: Baden-Württemberg: Karlsruhe                                   | 3           | y1            | y1              | 0.11                | -                    | -                   | This study            |
| MTD T 14841   | Germany: Baden-Württemberg: Karlsruhe                                   | E           | h1            | h6              | 0.90                | -                    | -                   | This study            |
| SMNK-REP 689  | Germany: Baden-Württemberg: Karlsruhe                                   | E           | h1            | -               | -                   | -                    | -                   | This study            |
| SMNK-REP 910  | Germany: Baden-Württemberg: Karlsruhe                                   | E           | h1            | -               | 0.99                | -                    | -                   | This study            |
| SMNK-REP 1003 | Germany: Baden-Württemberg: Karlsruhe: between Stauffort and Weingarten | E           | h1            | -               | 0.96                | -                    | -                   | This study            |
| MTD T 14813   | Germany: Baden-Württemberg: Karlsruhe: Oberwaldsee                      | E           | h1            | h1              | 0.99                | -                    | -                   | This study            |
| MTD T 14821   | Germany: Baden-Württemberg: Kniebis                                     | E           | h1            | h10             | 1.00                | -                    | -                   | This study            |
| MTD T 14843   | Germany: Baden-Württemberg: Laufensberg - Grunholz                      | 3           | y1            | y1              | 0.73                | -                    | -                   | This study            |
| MTD T 14820   | Germany: Baden-Württemberg: Lenzkirch                                   | E           | h1            | h1              | -                   | -                    | -                   | This study            |
| SMNK-REP 1268 | Germany: Baden-Württemberg: Lankenheim                                  | E           | h1            | -               | 1.00                | -                    | -                   | This study            |
| MTD T 14815   | Germany: Baden-Württemberg: lower Neckar valley                         | 3           | y1            | y5              | 0.09                | -                    | -                   | This study            |
| SMNS 12851    | Germany: Baden-Württemberg: Ludwigsburg                                 | 3           | y1            | -               | 0.08                | -                    | -                   | This study            |
| SMNS 12227    | Germany: Baden-Württemberg: Mettnau                                     | 3           | y37           | y1              | 0.15                | -                    | -                   | This study            |
| SMNS 14514    | Germany: Baden-Württemberg: near Geflingen: Krumbachtal                 | 3           | y1            | y26             | 0.03                | 0.98                 | 0.16                | This study            |
| SMNS 14515    | Germany: Baden-Württemberg: near Geflingen: Krumbachtal                 | 3           | y1            | y5              | 0.15                | -                    | -                   | This study            |
| SMNS 14511    | Germany: Baden-Württemberg: near Heilbronn: Reichershausen              | 3           | y1            | -               | 0.03                | 0.97                 | 0.10                | This study            |
| SMNS 9092     | Germany: Baden-Württemberg: near Ravensburg                             | 3           | y1            | y1              | -                   | -                    | -                   | This study            |
| MTD D 29648   | Germany: Baden-Württemberg: Oberweißbach                                | 3           | y1            | y1              | 0.18                | -                    | -                   | Kindler et al. (2013) |
| SMNS 14260    | Germany: Baden-Württemberg: Obilchen-Josingen                           | 3           | y1            | -               | 0.01                | 0.98                 | 0.25                | This study            |
| MTD T 14818   | Germany: Baden-Württemberg: Ottenhöfen                                  | E           | h1            | h1              | 1.00                | -                    | -                   | This study            |
| MTD T 14822   | Germany: Baden-Württemberg: Pfig                                        | 3           | y1            | -               | 0.92                | -                    | -                   | This study            |
| MTD T 14823   | Germany: Baden-Württemberg: Pfig                                        | E           | h1            | h1              | 0.92                | -                    | -                   | This study            |
| MTD T 14824   | Germany: Baden-Württemberg: Pfig                                        | E           | h1            | h1              | 0.99                | -                    | -                   | This study            |
| MTD T 14825   | Germany: Baden-Württemberg: Pfig                                        | E           | h1            | h1              | 0.99                | -                    | -                   | This study            |
| MTD T 14826   | Germany: Baden-Württemberg: Pfig                                        | E           | h1            | h1              | 0.99                | -                    | -                   | This study            |
| MTD T 14827   | Germany: Baden-Württemberg: Pfig                                        | E           | h1            | h1              | 1.00                | -                    | -                   | This study            |
| MTD T 14525   | Germany: Baden-Württemberg: Riedlingen                                  | 3           | y1            | y2              | 0.00                | 0.99                 | 0.13                | This study            |
| MTD T 14526   | Germany: Baden-Württemberg: Riedlingen                                  | 3           | y1            | -               | 0.00                | 0.99                 | 0.46                | This study            |
| MTD T 14527   | Germany: Baden-Württemberg: Riedlingen                                  | 3           | y1            | -               | 0.06                | -                    | -                   | This study            |
| MTD T 14528   | Germany: Baden-Württemberg: Riedlingen                                  | 3           | y1            | y2              | 0.02                | 0.99                 | 0.21                | This study            |
| MTD T 14529   | Germany: Baden-Württemberg: Riedlingen                                  | 3           | y1            | y2              | 0.00                | 0.99                 | 0.29                | This study            |
| MTD T 14829   | Germany: Baden-Württemberg: Schilach                                    | 3           | y1            | y34             | -                   | -                    | -                   | This study            |
| MTD T 14831   | Germany: Baden-Württemberg: Schilach                                    | 3           | y1            | y34             | 0.18                | -                    | -                   | This study            |
| MTD T 11994   | Germany: Baden-Württemberg: Schriesheim                                 | 3           | y1            | y5              | 0.32                | -                    | -                   | This study            |
| MTD T 14839   | Germany: Baden-Württemberg: Steinmauern                                 | E           | h1            | h1              | -                   | -                    | -                   | This study            |
| SMNS 14517    | Germany: Baden-Württemberg: Stuttgart-Bönnig                            | 3           | y1            | y5              | 0.00                | 0.99                 | 0.17                | This study            |
| SMNS 14518    | Germany: Baden-Württemberg: Stuttgart-Feuerbach                         | 3           | y1            | y5              | 0.24                | -                    | -                   | This study            |
| SMNS 14511    | Germany: Baden-Württemberg: Stuttgart-Hohenheim                         | 3           | y1            | y1              | 0.01                | 0.99                 | 0.11                | This study            |
| SMNS 14519    | Germany: Baden-Württemberg: Stuttgart-Hohenheim, Uti Campus, Eiszeisel  | 3           | y1            | y5              | 0.09                | -                    | -                   | This study            |
| SMNS 14985    | Germany: Baden-Württemberg: Stuttgart-Vaihingen                         | 3           | y1            | y26             | 0.22                | -                    | -                   | This study            |
| MTD T 14833   | Germany: Baden-Württemberg: Sulz-Fischingen                             | 3           | y1            | y1              | 0.09                | -                    | -                   | This study            |
| MTD T 12008   | Germany: Baden-Württemberg: Tübingen: Wumlingen                         | 3           | y1            | y1              | 0.02                | 0.98                 | 0.32                | This study            |
| MTD T 14834   | Germany: Baden-Württemberg: Zweifalten                                  | 3           | y1            | y2              | 0.04                | 0.96                 | 0.25                | This study            |
| MTD T 11137   | Germany: Bavaria: 1 km SSW Jachenau                                     | 3           | y1            | y12             | 0.39                | -                    | -                   | This study            |
| ZMH R09037    | Germany: Bavaria: Berchtesgaden                                         | 3           | y20           | -               | -                   | -                    | -                   | This study            |
| MTD T 11141   | Germany: Bavaria: between Katschenbach and Frankenberg                  | 3           | y1            | y5              | 0.00                | 0.98                 | 0.31                | This study            |
| MTD T 11142   | Germany: Bavaria: between Katschenbach and Frankenberg                  | 3           | y1            | y5              | 0.01                | 0.98                 | 0.54                | This study            |
| MTD T 11143   | Germany: Bavaria: between Katschenbach and Frankenberg                  | 3           | y1            | y5              | 0.00                | 0.99                 | 0.79                | This study            |
| MTD T 11145   | Germany: Bavaria: Dreschen                                              | 3           | y1            | y5              | 0.01                | 0.98                 | 0.62                | This study            |
| MTD T 14560   | Germany: Bavaria: E Passau: Erlau                                       | 4           | r3            | r10             | 0.00                | 0.98                 | 0.30                | This study            |
| MTD T 11147   | Germany: Bavaria: Hamstetten                                            | 3           | y1            | y13             | 0.00                | 0.96                 | 0.10                | This study            |
| MTD T 11136   | Germany: Bavaria: Jochenstein                                           | 4           | r3            | r10             | 0.00                | 0.93                 | -                   | This study            |
| MTD T 11158   | Germany: Bavaria: Klautzenbach                                          | 4           | r3            | r10             | 0.00                | 0.99                 | 0.53                | This study            |
| ZFMK 71166    | Germany: Bavaria: Marnendorf                                            | 4           | r3            | r20             | 0.00                | 0.97                 | 0.13                | Kindler et al. (2013) |
| MTD T 11134   | Germany: Bavaria: Munich                                                | 4           | r3            | r10             | 0.00                | 0.95                 | 0.10                | This study            |
| MTD T 11149   | Germany: Bavaria: Munich: Feldmoching                                   | 4           | r3            | r10             | 0.00                | 0.99                 | 0.28                | This study            |
| MTD T 11150   | Germany: Bavaria: Munich: Obermenzing                                   | 4           | r3            | r10             | 0.00                | 0.56                 | -                   | This study            |
| MTD T 11151   | Germany: Bavaria: Munich: Obermenzing                                   | 4           | r3            | r10             | 0.00                | 0.99                 | 0.07                | This study            |
| MTD T 11152   | Germany: Bavaria: Munich: Obermenzing                                   | 4           | r3            | r10             | 0.00                | 0.98                 | 0.04                | This study            |
| MTD T 11153   | Germany: Bavaria: Munich: Obermenzing                                   | 3           | y1            | y12             | 0.00                | 0.91                 | -                   | This study            |
| MTD T 11154   | Germany: Bavaria: Munich: Obermenzing                                   | 3           | y1            | y12             | 0.00                | 0.98                 | 0.04                | This study            |
| MTD T 11155   | Germany: Bavaria: Murnauer Moos                                         | 4           | r3            | r10             | 0.00                | 0.80                 | -                   | This study            |
| MTD T 11133   | Germany: Bavaria: Murnauer Moos                                         | 3           | y1            | y5              | 0.00                | 0.99                 | 0.19                | This study            |
| ZSM DNA 171   | Germany: Bavaria: near Bad Abbding                                      | 4           | r3            | r10             | 0.00                | 0.99                 | 0.07                | This study            |
| MTD T 11139   | Germany: Bavaria: near Hünning                                          | 4           | r3            | r10             | 0.00                | 0.98                 | 0.07                | This study            |
| MTD T 11144   | Germany: Bavaria: near Neumunster                                       | 4           | r3            | r5              | 0.04                | 0.98                 | 0.83                | This study            |
| MTD T 14552   | Germany: Bavaria: Olching                                               | 4           | r3            | r10             | 0.00                | 0.99                 | 0.07                | This study            |
| MTD T 11135   | Germany: Bavaria: Passau                                                | 4           | r3            | r10             | 0.00                | 0.99                 | 0.11                | This study            |
| ZFMK 56016    | Germany: Bavaria: Passau                                                | 4           | r3            | r10             | 0.01                | 0.94                 | -                   | Kindler et al. (2013) |
| MTD T 11138   | Germany: Bavaria: Schleiense                                            | 4           | r3            | r10             | 0.02                | 0.99                 | 0.11                | This study            |
| MTD T 14832   | Germany: Bavaria: Schwandorf                                            | 3           | y1            | y12             | 0.00                | 0.99                 | 0.08                | This study            |
| MTD T 11140   | Germany: Bavaria: Schwandorf                                            | 3           | y1            | -               | 0.00                | 0.99                 | 0.34                | This study            |
| MTD T 11148   | Germany: Bavaria: Wolfraatshausen                                       | 3           | y1            | y12             | 0.00                | 0.99                 | 0.14                | This study            |
| MTD T 14172   | Germany: Berlin: Teufelssee                                             | 3           | y1            | -               | 0.00                | 0.93                 | -                   | This study            |
| MTD T 14173   | Germany: Berlin: Teufelssee                                             | 3           | y1            | -               | 0.00                | 0.97                 | 0.15                | This study            |
| MTD D 47570   | Germany: Brandenburg: Brieske                                           | 3           | y1            | -               | 0.00                | 0.99                 | 0.56                | Kindler et al. (2013) |
| NME R 049206  | Germany: Brandenburg: Casel                                             | 3           | y1            | -               | -                   | -                    | -                   | This study            |
| MTD D 29503   | Germany: Brandenburg: Cumiösen                                          | 4           | r4            | HF680017        | 0.01                | 0.51                 | -                   | Kindler et al. (2013) |
| MTD T 11460   | Germany: Brandenburg: Forst                                             | 3           | y1            | y6              | 0.00                | 0.98                 | 0.41                | This study            |
| MTD T 14362   | Germany: Brandenburg: Götin                                             | 4           | r3            | r10             | 0.00                | 0.98                 | 0.60                | This study            |
| MTD T 14363   | Germany: Brandenburg: Götin                                             | 3           | y1            | y17             | 0.00                | 0.99                 | 0.84                | This study            |
| MTD T 14364   | Germany: Brandenburg: Götin                                             | 3           | y1            | y5              | 0.00                | 0.99                 | 0.92                | This study            |
| MTD T 14365   | Germany: Brandenburg: Götin                                             | 3           | y35           | y33             | 0.00                | 0.99                 | 0.67                | This study            |
| MTD T 14366   | Germany: Brandenburg: Götin                                             | 3           | y1            | y5              | 0.00                | 0.96                 | 0.88                | This study            |
| MTD T 14367   | Germany: Brandenburg: Götin                                             | 3           | y1            | y5              | 0.00                | 0.99                 | 0.89                | This study            |
| MTD T 14369   | Germany: Brandenburg: Götin                                             | 3           | y1            | y5              | 0.00                | 0.99                 | 0.92                | This study            |
| MTD T 14370   | Germany: Brandenburg: Götin                                             | 3           | y1            | y5              | 0.00                | 0.98                 | 0.78                | This study            |
| MTD T 14371   | Germany: Brandenburg: Götin                                             | 3           | y1            | y5              | 0.00                | 0.99                 | 0.83                | This study            |
| MTD T 14372   | Germany: Brandenburg: Götin                                             | 4           | r3            | r10             | 0.00                | 0.99                 | 0.54                | This study            |
| MTD T 14373   | Germany: Brandenburg: Götin                                             | 3           | y35           | y33             | 0.00                | 0.98                 | 0.66                | This study            |
| MTD T 14374   | Germany: Brandenburg: Götin                                             | 3           | y35           | y33             | 0.00                | 0.99                 | 0.93                | This study            |
| MTD T 14375   | Germany: Brandenburg: Götin                                             | 3           | y1            | y5              | 0.00                | 0.96                 | 0.68                | This study            |
| MTD T 14376   | Germany: Brandenburg: Götin                                             | 3           | y1            | y5              | 0.00                | 0.99                 | 0.80                | This study            |
| MTD T 14377   | Germany: Brandenburg: Götin                                             | 3           | y1            | y5              | 0.00                | 0.97                 | 0.87                | This study            |
| MTD T 14378   | Germany: Brandenburg: Götin                                             | 4           | r3            | r10             | 0.00                | 0.97                 | 0.90                | This study            |
| MTD T 14379   | Germany: Brandenburg: Götin                                             | 3           | y1            | y5              | 0.00                | 0.98                 | 0.56                | This study            |
| MTD T 14380   | Germany: Brandenburg: Götin                                             | 3           | y1            | y5              | 0.00                | 0.96                 | 0.78                | This study            |
| MTD T 14381   | Germany: Brandenburg: Götin                                             | 3           | y1            | y5              | 0.00                | 0.97                 | 0.87                | This study            |
| MTD T 14382   | Germany: Brandenburg: Götin                                             | 3           | y1            | y5              | 0.00                | 0.99                 | 0.89                | This study            |
| MTD T 14383   | Germany: Brandenburg: Götin                                             | 3           | y1            | y5              | 0.00                | 0.95                 | 0.96                | This study            |
| MTD T 14384   | Germany: Brandenburg: Götin                                             | 3           | y1            | y5              | 0.00                | 0.99                 | 0.86                | This study            |
| MTD T 14385   | Germany: Brandenburg: Götin                                             | 3           | y1            | y5              | 0.00                | 0.98                 | 0.83                | This study            |
| MTD T 14386   | Germany: Brandenburg: Götin                                             | 3           | y1            | y5              | 0.00                | 0.99                 | 0.92                | This study            |
| MTD T 14387   | Germany: Brandenburg: Götin                                             | 3           | y1            | y5              | 0.00                | 0.99                 | 0.91                | This study            |
| MTD T 14530   | Germany: Brandenburg: Gülpe                                             | 3           | y8            | y17             | 0.00                | 0.95                 | 0.88                | This study            |
| MTD D 47197   | Germany: Brandenburg: Guteborn                                          | 3           | y1            | y5              | 0.00                | 0.97                 | 0.48                | Kindler et al. (2013) |
| MTD T 3813    | Germany: Brandenburg: Guteborn                                          | 3           | -             | y5              | 0.00                | 0.97                 | 0.48                | Kindler et al. (2013) |
| MTD D 45304   | Germany: Brandenburg: Hosna                                             | 3           | y1            | y19             | 0.00                | 0.98                 | 0.89                | Kindler et al. (2013) |
| ZMB 66570     | Germany: Brandenburg: near Barmne                                       | 3           | y1            | y19             | 0.00                | 0.99                 | 0.60                | Kindler et al. (2014) |
| MTD D 29504   | Germany: Brandenburg: Perleberg                                         | 3           | y20           | y29             | -                   | -                    | -                   | Kindler et al. (2013) |
| MTD T 14345   | Germany: Brandenburg: Schwedt/Oder                                      | 3           | y1            | -               | 0.00                | 0.99                 | 0.92                | This study            |
| ZFMK 76358    | Germany: Brandenburg: Senftenberg                                       | 3           | y1            | y17             | 0.00                | 0.98                 | 0.89                | Kindler et al. (2013) |
| MTD T 14368   | Germany: Brandenburg: Wuster                                            | 3           | y13           | y17             | 0.00                | 0.98                 | 0.74                | This study            |
| ZMH R09735    | Germany: Hamburg: Klüvenstein                                           | 3           | y1            | y20             | 0.00                | 0.99                 | 0.94                | This study            |
| ZMH R06162    | Germany: Hamburg: Ohlsdorf                                              | 3           | y1            | -               | 0.03                | 0.99                 | 0.95                | This study            |
| ZMH R09809    | Germany: Hamburg: Woblfeld                                              | 3           | y1            | -               | -                   | -                    | -                   | This study            |
| ZMH R09848    | Germany: Hamburg: Woblfeld                                              | 3           | y20           | -               | -                   | -                    | -                   | This study            |
| MTD T 14620   | Germany: Hesse: Bbrau Weimede                                           | 3           | y1            | y5              | 0.00                | 0.98                 | 0.84                | This study            |

• Table S1 continued

| Voucher          | Locality                                                              | mtDNA data  |               |                 | Microsatellite data |                      |                     | Reference             |
|------------------|-----------------------------------------------------------------------|-------------|---------------|-----------------|---------------------|----------------------|---------------------|-----------------------|
|                  |                                                                       | mtDNA clade | ND4 haplotype | cyt b haplotype | First STRUCTURE run | Second STRUCTURE run | Third STRUCTURE run |                       |
| SMF 7640         | Germany: Hesse: Bergen-Enkheim                                        | E           | h1            | h1              | 0.91                | -                    | -                   | This study            |
| SMF 71026        | Germany: Hesse: Bisbergemünd                                          | 3           | y1            | -               | 0.01                | 0.99                 | 0.62                | This study            |
| SMF 71027        | Germany: Hesse: Bisbergemünd                                          | 3           | y1            | y31             | 0.06                | -                    | -                   | This study            |
| SMF 77543        | Germany: Hesse: Bisbergemünd-Beitenborn                               | 3           | y1            | y5              | 0.20                | -                    | -                   | This study            |
| SMF 78480        | Germany: Hesse: Fliesen                                               | 3           | y1            | y31             | 0.00                | 0.98                 | 0.69                | This study            |
| ZFMK 58023       | Germany: Hesse: Fliesen                                               | 3           | y39           | y5              | 0.09                | -                    | -                   | This study            |
| ZFMK 82929       | Germany: Hesse: Fliesen                                               | 3           | y1            | y31             | 0.06                | -                    | -                   | Kindler et al. (2013) |
| SMF 79183        | Germany: Hesse: Hasselroth-Neuenhaiden                                | 3           | y1            | y5              | 0.39                | -                    | -                   | This study            |
| ZFMK 89403       | Germany: Hesse: Herborn                                               | E           | h1            | h1              | -                   | -                    | -                   | Kindler et al. (2013) |
| MTD T 14112      | Germany: Hesse: Herborn                                               | E           | h1            | h1              | 1.00                | -                    | -                   | This study            |
| MTD T 14842      | Germany: Hesse: Hirschhorn                                            | 3           | y1            | y5              | -                   | -                    | -                   | This study            |
| MTD D 35776      | Germany: Hesse: Hofheim/Lorsbach                                      | E           | h1            | h24             | 0.97                | -                    | -                   | Kindler et al. (2013) |
| MTD T 14175      | Germany: Hesse: Lautertal-Beedenkirchen                               | E           | h1            | -               | 0.73                | -                    | -                   | This study            |
| ZSUM Re-S2.1.1.c | Germany: Hesse: Marburg                                               | E           | h1            | h1              | 0.97                | -                    | -                   | This study            |
| ZSUM Re-S2.1.1.a | Germany: Hesse: Marburg: Lahn mountains                               | C           | e1            | e2              | 0.33                | -                    | -                   | This study            |
| ZSUM Re-S2.1.2.a | Germany: Hesse: Marburg: Lahn mountains                               | C           | e1            | -               | 0.43                | -                    | -                   | This study            |
| ZSUM Re-S2.1.2.b | Germany: Hesse: Marburg: Lahn mountains                               | unknown     | -             | -               | 0.47                | -                    | -                   | This study            |
| ZSUM Re-S2.1.2.g | Germany: Hesse: Marburg: Lahn mountains                               | C           | e1            | -               | 0.99                | -                    | -                   | This study            |
| MTD T 1929       | Germany: Hesse: Marburg: new botanical garden                         | 3           | y1            | -               | -                   | -                    | -                   | This study            |
| MTD T 1930       | Germany: Hesse: Marburg: new botanical garden                         | 3           | y1            | -               | -                   | -                    | -                   | This study            |
| MTD T 1931       | Germany: Hesse: Marburg: new botanical garden                         | 3           | y39           | y5              | 0.01                | 0.95                 | 0.80                | This study            |
| MTD T 1932       | Germany: Hesse: Marburg: new botanical garden                         | 3           | y39           | -               | 0.03                | 0.93                 | -                   | This study            |
| MTD T 1933       | Germany: Hesse: Marburg: new botanical garden                         | 3           | y39           | y5              | 0.41                | -                    | -                   | This study            |
| MTD T 14000      | Germany: Hesse: near Bad Homburg                                      | 3           | y1            | -               | 0.00                | 0.99                 | 0.90                | This study            |
| SMF 7339         | Germany: Hesse: near Bieber                                           | 3           | y1            | y31             | 0.04                | 0.96                 | 0.82                | This study            |
| SMF 72196        | Germany: Hesse: near Hanau: Mittelbuchen                              | E           | h1            | -               | -                   | -                    | -                   | This study            |
| SMF 72456        | Germany: Hesse: near Kelkheim: Fischbach                              | E           | h1            | h24             | 0.99                | -                    | -                   | This study            |
| ZFMK 82930       | Germany: Hesse: Steinau                                               | 4           | e3            | e10             | 0.00                | 0.83                 | -                   | Kindler et al. (2013) |
| SMF 75825        | Germany: Hesse: SW Gess-Gera: Kähkopf                                 | E           | h1            | h1              | 1.00                | -                    | -                   | This study            |
| SMF 74531        | Germany: Hesse: W Oberndorf                                           | 3           | y1            | y31             | 0.07                | -                    | -                   | This study            |
| SMF 78703        | Germany: Hesse: Weiltod: Niederlanden                                 | E           | h1            | h4              | 0.99                | -                    | -                   | This study            |
| MTD T 14749      | Germany: Lower Saxony: Cuxhaven: Spanger Heide                        | 3           | y1            | y17             | 0.00                | 0.99                 | 0.95                | This study            |
| MTD T 14750      | Germany: Lower Saxony: Cuxhaven: Spanger Heide                        | 3           | y1            | y18             | 0.00                | 0.99                 | 0.89                | This study            |
| LMNM REP963      | Germany: Lower Saxony: Frieschenmoor                                  | 3           | y1            | y17             | 0.05                | 0.87                 | -                   | This study            |
| MTD T 13919      | Germany: Lower Saxony: Gartow                                         | 3           | y35           | -               | 0.00                | 0.99                 | 0.90                | This study            |
| MTD T 13374      | Germany: Lower Saxony: Hannover                                       | 3           | y1            | -               | -                   | -                    | -                   | This study            |
| MTD T 13367      | Germany: Lower Saxony: Hannover                                       | 3           | y1            | y27             | -                   | -                    | -                   | This study            |
| LMNM REP961      | Germany: Lower Saxony: Haterwisting                                   | 3           | y1            | y17             | -                   | -                    | -                   | This study            |
| LMNM REP107      | Germany: Lower Saxony: Hude                                           | 3           | y1            | y17             | 0.02                | 0.99                 | 0.95                | This study            |
| LMNM REP960      | Germany: Lower Saxony: Huttonen                                       | 3           | y1            | y18             | 0.16                | -                    | -                   | This study            |
| MTD T 13370      | Germany: Lower Saxony: Lachendorf                                     | 3           | y35           | -               | 0.01                | 0.98                 | 0.90                | This study            |
| MTD T 13371      | Germany: Lower Saxony: Lachendorf                                     | 3           | y1            | -               | 0.00                | 0.99                 | 0.95                | This study            |
| ZFMK 86134       | Germany: Lower Saxony: Lachendorf                                     | 3           | y1            | y5              | 0.00                | 0.99                 | 0.92                | Kindler et al. (2013) |
| ZMH 89088        | Germany: Lower Saxony: Lellefde                                       | 3           | y1            | y8              | 0.01                | 0.99                 | 0.71                | Kindler et al. (2013) |
| ZMH 80676        | Germany: Lower Saxony: Lichow-Daemenberg: Pevestorf                   | 3           | y20           | y20             | 0.00                | 0.65                 | -                   | This study            |
| ZMH 80678        | Germany: Lower Saxony: Lichow-Daemenberg: Pevestorf                   | 3           | y20           | y20             | 0.12                | -                    | -                   | This study            |
| ZMH 80695        | Germany: Lower Saxony: Lichow-Daemenberg: Pevestorf                   | 3           | y20           | y29             | 0.00                | 0.93                 | -                   | This study            |
| ZMH 80699        | Germany: Lower Saxony: Lichow-Daemenberg: Pevestorf                   | 3           | y20           | -               | 0.01                | 0.46                 | -                   | This study            |
| ZMH 80767        | Germany: Lower Saxony: Lichow-Daemenberg: Pevestorf                   | 3           | y20           | y29             | 0.01                | 0.78                 | -                   | This study            |
| ZMH 80787        | Germany: Lower Saxony: Lichow-Daemenberg: Pevestorf                   | 3           | y20           | y29             | 0.00                | 0.73                 | -                   | This study            |
| ZMH 80845        | Germany: Lower Saxony: Lichow-Daemenberg: Pevestorf                   | 3           | y20           | y29             | 0.00                | 0.08                 | -                   | This study            |
| ZMH 80896        | Germany: Lower Saxony: Lichow-Daemenberg: Pevestorf                   | 3           | y20           | y29             | 0.00                | 0.39                 | -                   | This study            |
| ZMH 80935        | Germany: Lower Saxony: Lichow-Daemenberg: Pevestorf                   | 3           | y20           | y29             | 0.00                | 0.40                 | -                   | This study            |
| ZMH 80936        | Germany: Lower Saxony: Lichow-Daemenberg: Pevestorf                   | 3           | y20           | -               | 0.00                | 0.92                 | -                   | This study            |
| ZMH 80937        | Germany: Lower Saxony: Lichow-Daemenberg: Pevestorf                   | 3           | y20           | y29             | 0.00                | 0.58                 | -                   | This study            |
| ZMH 80940        | Germany: Lower Saxony: Lichow-Daemenberg: Pevestorf                   | 3           | y20           | y29             | 0.01                | 0.85                 | -                   | This study            |
| ZMH 80963        | Germany: Lower Saxony: Lichow-Daemenberg: Pevestorf                   | 3           | y20           | y29             | 0.00                | 0.92                 | -                   | This study            |
| ZMH 80974        | Germany: Lower Saxony: Lichow-Daemenberg: Pevestorf                   | 3           | y20           | y29             | 0.00                | 0.66                 | -                   | This study            |
| ZMH 80975        | Germany: Lower Saxony: Lichow-Daemenberg: Pevestorf                   | 3           | y20           | y29             | 0.00                | 0.85                 | -                   | This study            |
| MTD T 13373      | Germany: Lower Saxony: Meilendorf                                     | 3           | y1            | y17             | 0.01                | 0.98                 | 0.77                | This study            |
| MTD T 13368      | Germany: Lower Saxony: near Celle: Bannetzer Moor                     | 3           | y1            | -               | 0.01                | 0.99                 | 0.54                | This study            |
| MTD T 13369      | Germany: Lower Saxony: near Cuxhaven: Arensch                         | 3           | y1            | -               | 0.01                | 0.99                 | 0.55                | This study            |
| MTD T 13372      | Germany: Lower Saxony: near Dannefeld                                 | 3           | y35           | -               | 0.00                | 0.97                 | 0.77                | This study            |
| LMNM REP957      | Germany: Lower Saxony: Oldendorf                                      | 3           | y1            | y17             | 0.08                | -                    | -                   | This study            |
| LMNM REP946      | Germany: Lower Saxony: Oldendorf                                      | 3           | y1            | -               | -                   | -                    | -                   | This study            |
| LMNM REP962      | Germany: Lower Saxony: Oldendorf: Eversen                             | 3           | y1            | y17             | 0.15                | -                    | -                   | This study            |
| MTD T 14621      | Germany: Lower Saxony: Oldendorf (Labe)                               | 3           | -             | y19             | -                   | -                    | -                   | This study            |
| MTD T 14622      | Germany: Lower Saxony: Oldendorf (Labe)                               | 3           | y1            | y19             | 0.00                | 0.99                 | 0.93                | This study            |
| LMNM REP553      | Germany: Lower Saxony: Ratfeld                                        | 3           | y1            | -               | -                   | -                    | -                   | This study            |
| LMNM REP128      | Germany: Lower Saxony: S Oldendorf: Barnefiller Holz                  | 3           | y1            | -               | 0.02                | 0.98                 | 0.42                | This study            |
| ZMH 80671        | Germany: Lower Saxony: Salzhagen                                      | 3           | y1            | -               | -                   | -                    | -                   | This study            |
| ZMH 80901        | Germany: Lower Saxony: Stade                                          | 3           | y1            | -               | -                   | -                    | -                   | This study            |
| MTD T 13917      | Germany: Lower Saxony: Steinhuder Meer                                | 3           | y1            | y17             | 0.03                | 0.99                 | 0.91                | This study            |
| MTD T 13918      | Germany: Lower Saxony: Steinhuder Meer                                | 3           | y1            | y17             | 0.02                | 0.99                 | 0.84                | This study            |
| MTD T 11465      | Germany: Mecklenburg-Western Pomerania: 3 km E Wesenberg              | 3           | y1            | y22             | 0.00                | 0.99                 | 0.94                | Kindler et al. (2014) |
| MTD T 11466      | Germany: Mecklenburg-Western Pomerania: 3 km E Wesenberg              | 3           | y1            | y17             | 0.00                | 0.98                 | 0.87                | Kindler et al. (2014) |
| MTD T 11467      | Germany: Mecklenburg-Western Pomerania: 3 km E Wesenberg              | 3           | y1            | y17             | 0.00                | 0.99                 | 0.91                | Kindler et al. (2014) |
| MTD T 11468      | Germany: Mecklenburg-Western Pomerania: 3 km E Wesenberg              | 3           | y31           | y17             | 0.01                | 0.91                 | -                   | Kindler et al. (2014) |
| MTD T 11469      | Germany: Mecklenburg-Western Pomerania: 3 km E Wesenberg              | 3           | y1            | y17             | 0.00                | 0.98                 | 0.85                | Kindler et al. (2014) |
| MTD T 11470      | Germany: Mecklenburg-Western Pomerania: 3 km E Wesenberg              | 3           | y1            | y17             | 0.00                | 0.99                 | 0.87                | Kindler et al. (2014) |
| MTD T 11471      | Germany: Mecklenburg-Western Pomerania: 3 km E Wesenberg              | 3           | y1            | y17             | 0.00                | 0.98                 | 0.89                | Kindler et al. (2014) |
| MTD T 11472      | Germany: Mecklenburg-Western Pomerania: 3 km E Wesenberg              | 3           | y1            | y17             | 0.00                | 0.99                 | 0.89                | Kindler et al. (2014) |
| MTD T 11473      | Germany: Mecklenburg-Western Pomerania: 3 km E Wesenberg              | 3           | y1            | y17             | 0.00                | 0.99                 | 0.84                | Kindler et al. (2014) |
| MTD T 11474      | Germany: Mecklenburg-Western Pomerania: 3 km E Wesenberg              | 3           | y1            | y17             | 0.00                | 0.98                 | 0.95                | Kindler et al. (2014) |
| MTD T 11476      | Germany: Mecklenburg-Western Pomerania: 3 km E Wesenberg              | 3           | y1            | y17             | 0.00                | 0.99                 | 0.89                | Kindler et al. (2014) |
| MTD T 11477      | Germany: Mecklenburg-Western Pomerania: 3 km E Wesenberg              | 3           | y1            | y22             | 0.00                | 0.99                 | 0.90                | Kindler et al. (2014) |
| MTD T 11478      | Germany: Mecklenburg-Western Pomerania: 3 km E Wesenberg              | 3           | y1            | y17             | 0.00                | 0.98                 | 0.91                | Kindler et al. (2014) |
| MTD T 11479      | Germany: Mecklenburg-Western Pomerania: 3 km E Wesenberg              | 3           | y1            | y17             | 0.00                | 0.96                 | 0.48                | Kindler et al. (2014) |
| MTD T 11480      | Germany: Mecklenburg-Western Pomerania: 3 km E Wesenberg              | 3           | y1            | y17             | 0.00                | 0.99                 | 0.94                | Kindler et al. (2014) |
| MTD T 11481      | Germany: Mecklenburg-Western Pomerania: 3 km E Wesenberg              | 3           | y1            | y17             | 0.00                | 0.99                 | 0.91                | Kindler et al. (2014) |
| MTD T 11482      | Germany: Mecklenburg-Western Pomerania: 3 km E Wesenberg              | 3           | y1            | y17             | 0.00                | 0.98                 | 0.92                | Kindler et al. (2014) |
| NME R 056708     | Germany: Mecklenburg-Western Pomerania: Boin                          | 3           | y1            | y17             | 0.00                | 0.99                 | 0.93                | This study            |
| NME R 097314     | Germany: Mecklenburg-Western Pomerania: Groß-Miltzow                  | 3           | y22           | -               | 0.00                | 0.97                 | 0.18                | This study            |
| NME R 097414     | Germany: Mecklenburg-Western Pomerania: Groß-Miltzow                  | 3           | y1            | y17             | 0.00                | 0.99                 | 0.95                | This study            |
| ZFMK 61635       | Germany: Mecklenburg-Western Pomerania: Glistrow                      | 3           | -             | y17             | -                   | -                    | -                   | Kindler et al. (2013) |
| NME R 041402     | Germany: Mecklenburg-Western Pomerania: near Ahlbeck                  | 3           | y1            | -               | 0.00                | 0.99                 | 0.69                | This study            |
| NME R 096314     | Germany: Mecklenburg-Western Pomerania: near Ahlbeck                  | 3           | y1            | -               | 0.00                | 0.98                 | 0.43                | This study            |
| MTD T 12145      | Germany: Mecklenburg-Western Pomerania: near Altwarp                  | 3           | y1            | y17             | 0.00                | 0.97                 | 0.90                | This study            |
| MTD T 12146      | Germany: Mecklenburg-Western Pomerania: near Altwarp                  | 3           | y1            | y17             | 0.00                | 0.98                 | 0.79                | This study            |
| MTD T 12147      | Germany: Mecklenburg-Western Pomerania: near Altwarp                  | 3           | y1            | y17             | 0.00                | 0.98                 | 0.93                | This study            |
| MTD T 12148      | Germany: Mecklenburg-Western Pomerania: near Altwarp                  | 3           | y1            | y17             | 0.00                | 0.97                 | 0.95                | This study            |
| MTD T 12149      | Germany: Mecklenburg-Western Pomerania: near Altwarp                  | 3           | y1            | -               | 0.00                | 0.98                 | 0.92                | This study            |
| MTD T 12150      | Germany: Mecklenburg-Western Pomerania: near Altwarp                  | 3           | y1            | -               | 0.00                | 0.98                 | 0.80                | This study            |
| MTD T 12134      | Germany: Mecklenburg-Western Pomerania: near Carwitz                  | 3           | y22           | y17             | 0.00                | 0.99                 | 0.95                | This study            |
| MTD T 12135      | Germany: Mecklenburg-Western Pomerania: near Carwitz                  | 3           | y1            | y17             | 0.00                | 0.99                 | 0.91                | This study            |
| MTD T 12136      | Germany: Mecklenburg-Western Pomerania: near Carwitz                  | 3           | y1            | y17             | 0.00                | 0.99                 | 0.85                | This study            |
| MTD T 12137      | Germany: Mecklenburg-Western Pomerania: near Carwitz                  | 3           | y1            | y17             | 0.00                | 0.99                 | 0.81                | This study            |
| MTD T 12138      | Germany: Mecklenburg-Western Pomerania: near Carwitz                  | 3           | y22           | y17             | 0.00                | 0.99                 | 0.88                | This study            |
| MTD T 12139      | Germany: Mecklenburg-Western Pomerania: near Carwitz                  | 3           | y1            | -               | 0.00                | 0.99                 | 0.86                | This study            |
| MTD T 12140      | Germany: Mecklenburg-Western Pomerania: near Carwitz                  | 3           | y1            | y17             | 0.00                | 0.90                 | -                   | This study            |
| MTD T 12141      | Germany: Mecklenburg-Western Pomerania: near Carwitz                  | 3           | y22           | y17             | 0.00                | 0.99                 | 0.62                | This study            |
| MTD T 12142      | Germany: Mecklenburg-Western Pomerania: near Carwitz                  | 3           | y1            | -               | 0.00                | 0.98                 | 0.90                | This study            |
| MTD T 12143      | Germany: Mecklenburg-Western Pomerania: near Carwitz                  | 3           | y22           | y17             | 0.01                | 0.98                 | 0.61                | This study            |
| MTD T 12144      | Germany: Mecklenburg-Western Pomerania: near Carwitz                  | 3           | y1            | y17             | 0.00                | 0.98                 | 0.90                | This study            |
| MTD T 1482       | Germany: Mecklenburg-Western Pomerania: near Stralsund                | 3           | y1            | y17             | 0.00                | 0.98                 | 0.88                | This study            |
| MTD T 12829      | Germany: Mecklenburg-Western Pomerania: near Wistrow                  | 3           | y1            | -               | 0.00                | 0.99                 | 0.40                | This study            |
| MTD T 11462      | Germany: Mecklenburg-Western Pomerania: Neubrandenburg                | 3           | y1            | y17             | 0.00                | 0.99                 | 0.91                | Kindler et al. (2014) |
| MTD T 11463      | Germany: Mecklenburg-Western Pomerania: Neubrandenburg                | 3           | y1            | y17             | 0.00                | 0.99                 | 0.92                | Kindler et al. (2014) |
| MTD T 11464      | Germany: Mecklenburg-Western Pomerania: Neubrandenburg                | 3           | y1            | y17             | 0.00                | 0.99                 | 0.83                | Kindler et al. (2014) |
| NME R 047506     | Germany: Mecklenburg-Western Pomerania: Neubrandenburg                | 3           | y1            | y17             | 0.00                | 0.98                 | 0.88                | This study            |
| MTD T 1475       | Germany: Mecklenburg-Western Pomerania: Neubrandenburg: Lake Tollense | 3           | y1            | y17             | 0.00                | 0.98                 | 0.77                | Kindler et al. (2014) |
| ZFMK 47435       | Germany: Mecklenburg-Western Pomerania: Neukloster                    | 3           | y1            | -               | 0.00                | 0.99                 | 0.95                | Kindler et al. (2013) |
| NME R 047406     | Germany: Mecklenburg-Western Pomerania: Prewow                        | 3           | y43           | y1              | 0.00                | 0.99                 | 0.93                | This study            |
| MTD T 14508      | Germany: Mecklenburg-Western Pomerania: Rostock: Radebe               | 3           | y10           | y17             | 0.00                | 0.99                 | 0.95                | This study            |

• Table S1 continued

| Voucher     | Locality                                                                     | mtDNA data  |               |                 | Microsatellite data |                      |                     | Reference             |
|-------------|------------------------------------------------------------------------------|-------------|---------------|-----------------|---------------------|----------------------|---------------------|-----------------------|
|             |                                                                              | mtDNA clade | ND4 haplotype | cyt b haplotype | First STRUCTURE run | Second STRUCTURE run | Third STRUCTURE run |                       |
| MTD T 1483  | Germany: Mecklenburg-Western Pomerania: Saal: Nenudorf-Heide                 | 3           | y1            | y1              | 0.00                | 0.96                 | 0.94                | This study            |
| MTD T 1484  | Germany: Mecklenburg-Western Pomerania: Saal: Nenudorf-Heide                 | 3           | y1            | y1              | 0.00                | 0.98                 | 0.91                | This study            |
| MTD T 1483  | Germany: Mecklenburg-Western Pomerania: Usedom                               | 3           | y1            | y17             | 0.00                | 0.94                 | -                   | Kindler et al. (2014) |
| MTD T 1484  | Germany: Mecklenburg-Western Pomerania: Usedom                               | 3           | y1            | y17             | 0.00                | 0.98                 | 0.90                | Kindler et al. (2014) |
| ZFMK 68431  | Germany: North Rhine-Westphalia: Bad Honorf                                  | E           | h1            | -               | 1.00                | -                    | -                   | Kindler et al. (2013) |
| ZFMK 68432  | Germany: North Rhine-Westphalia: Bad Honorf                                  | E           | h1            | h1              | 1.00                | -                    | -                   | Kindler et al. (2013) |
| ZFMK 92193  | Germany: North Rhine-Westphalia: Bad Münsterfeld                             | E           | h1            | h1              | 0.99                | -                    | -                   | Kindler et al. (2013) |
| MTD T 11191 | Germany: North Rhine-Westphalia: between Annelsbüren and Davensberg          | E           | h1            | h1              | 0.98                | -                    | -                   | This study            |
| MTD T 11193 | Germany: North Rhine-Westphalia: between Annelsbüren and Davensberg          | E           | h1            | h1              | 1.00                | -                    | -                   | This study            |
| MTD T 11194 | Germany: North Rhine-Westphalia: between Annelsbüren and Davensberg          | E           | h1            | h1              | 0.99                | -                    | -                   | This study            |
| MTD T 11195 | Germany: North Rhine-Westphalia: between Annelsbüren and Davensberg          | E           | h1            | h1              | 0.99                | -                    | -                   | This study            |
| MTD T 11196 | Germany: North Rhine-Westphalia: between Annelsbüren and Davensberg          | E           | h1            | h1              | 0.99                | -                    | -                   | This study            |
| MTD T 11197 | Germany: North Rhine-Westphalia: between Annelsbüren and Davensberg          | E           | h1            | h1              | 1.00                | -                    | -                   | This study            |
| MTD T 11198 | Germany: North Rhine-Westphalia: between Annelsbüren and Davensberg          | E           | h1            | h1              | 0.85                | -                    | -                   | This study            |
| MTD T 11199 | Germany: North Rhine-Westphalia: between Annelsbüren and Davensberg          | E           | h1            | h1              | 1.00                | -                    | -                   | This study            |
| MTD T 11200 | Germany: North Rhine-Westphalia: between Annelsbüren and Davensberg          | E           | h1            | h1              | 1.00                | -                    | -                   | This study            |
| MTD T 11204 | Germany: North Rhine-Westphalia: between Annelsbüren and Davensberg          | E           | h1            | h1              | 1.00                | -                    | -                   | This study            |
| MTD T 11408 | Germany: North Rhine-Westphalia: between Annelsbüren and Davensberg          | E           | h1            | h1              | 1.00                | -                    | -                   | This study            |
| MTD T 11409 | Germany: North Rhine-Westphalia: between Annelsbüren and Davensberg          | E           | h1            | h1              | 1.00                | -                    | -                   | This study            |
| MTD T 11412 | Germany: North Rhine-Westphalia: between Annelsbüren and Davensberg          | E           | h1            | h1              | 0.99                | -                    | -                   | This study            |
| MTD T 11414 | Germany: North Rhine-Westphalia: between Annelsbüren and Davensberg          | E           | h1            | h1              | 1.00                | -                    | -                   | This study            |
| MTD T 11415 | Germany: North Rhine-Westphalia: between Annelsbüren and Davensberg          | E           | h1            | h1              | 0.99                | -                    | -                   | This study            |
| MTD T 11417 | Germany: North Rhine-Westphalia: between Annelsbüren and Davensberg          | E           | h1            | h1              | 1.00                | -                    | -                   | This study            |
| MTD T 11420 | Germany: North Rhine-Westphalia: between Annelsbüren and Davensberg          | E           | h1            | h1              | 0.99                | -                    | -                   | This study            |
| MTD T 11421 | Germany: North Rhine-Westphalia: between Annelsbüren and Davensberg          | E           | h1            | h1              | 0.98                | -                    | -                   | This study            |
| MTD T 11422 | Germany: North Rhine-Westphalia: between Annelsbüren and Davensberg          | E           | h1            | h1              | 0.98                | -                    | -                   | This study            |
| MTD T 11424 | Germany: North Rhine-Westphalia: between Annelsbüren and Davensberg          | E           | h1            | h1              | 1.00                | -                    | -                   | This study            |
| MTD T 11426 | Germany: North Rhine-Westphalia: between Annelsbüren and Davensberg          | E           | h1            | h1              | 1.00                | -                    | -                   | This study            |
| MTD T 11427 | Germany: North Rhine-Westphalia: between Annelsbüren and Davensberg          | E           | h1            | h1              | 0.98                | -                    | -                   | This study            |
| MTD T 11429 | Germany: North Rhine-Westphalia: between Annelsbüren and Davensberg          | E           | h1            | h1              | 0.99                | -                    | -                   | This study            |
| MTD T 11430 | Germany: North Rhine-Westphalia: between Annelsbüren and Davensberg          | E           | h1            | h1              | 1.00                | -                    | -                   | This study            |
| MTD T 11432 | Germany: North Rhine-Westphalia: between Annelsbüren and Davensberg          | E           | h1            | h1              | 0.98                | -                    | -                   | This study            |
| ZFMK 75088  | Germany: North Rhine-Westphalia: between Bergisch-Glabach and Herrenstrunden | E           | h1            | -               | 1.00                | -                    | -                   | Kindler et al. (2013) |
| ZFMK 70420  | Germany: North Rhine-Westphalia: between Hirtgenwald and Gey                 | E           | h1            | h1              | 1.00                | -                    | -                   | Kindler et al. (2013) |
| MTD T 12044 | Germany: North Rhine-Westphalia: between Ratingen and Disseisdorf            | E           | h1            | h1              | 1.00                | -                    | -                   | This study            |
| ZFMK 68433  | Germany: North Rhine-Westphalia: Bonn                                        | E           | h10           | h1              | 0.99                | -                    | -                   | Kindler et al. (2013) |
| ZFMK 92228  | Germany: North Rhine-Westphalia: Bonn                                        | E           | h1            | -               | 0.98                | -                    | -                   | Kindler et al. (2013) |
| ZFMK 92536  | Germany: North Rhine-Westphalia: Bonn                                        | E           | h10           | h1              | 0.96                | -                    | -                   | Kindler et al. (2013) |
| ZFMK 92537  | Germany: North Rhine-Westphalia: Bonn                                        | E           | h10           | h1              | 0.98                | -                    | -                   | Kindler et al. (2013) |
| ZFMK 89393  | Germany: North Rhine-Westphalia: Bonn: Kottenfest                            | E           | h10           | h1              | 0.99                | -                    | -                   | Kindler et al. (2013) |
| MTD T 12106 | Germany: North Rhine-Westphalia: Brüchermühle                                | E           | h1            | -               | 1.00                | -                    | -                   | This study            |
| MTD T 12107 | Germany: North Rhine-Westphalia: Brüchermühle                                | E           | h1            | h1              | 0.98                | -                    | -                   | This study            |
| MTD T 12108 | Germany: North Rhine-Westphalia: Brüchermühle                                | E           | h1            | -               | 1.00                | -                    | -                   | This study            |
| MTD T 12109 | Germany: North Rhine-Westphalia: Brüchermühle                                | E           | h1            | -               | 0.99                | -                    | -                   | This study            |
| MTD T 12110 | Germany: North Rhine-Westphalia: Brüchermühle                                | E           | h1            | -               | 1.00                | -                    | -                   | This study            |
| MTD T 12111 | Germany: North Rhine-Westphalia: Brüchermühle                                | E           | h1            | -               | 0.99                | -                    | -                   | This study            |
| MTD T 12112 | Germany: North Rhine-Westphalia: Brüchermühle                                | E           | h1            | h1              | 0.98                | -                    | -                   | This study            |
| MTD T 12115 | Germany: North Rhine-Westphalia: Brüchermühle                                | E           | h1            | -               | 1.00                | -                    | -                   | This study            |
| MTD T 12117 | Germany: North Rhine-Westphalia: Brüchermühle                                | E           | h1            | -               | 1.00                | -                    | -                   | This study            |
| MTD T 12118 | Germany: North Rhine-Westphalia: Brüchermühle                                | E           | h1            | h1              | 1.00                | -                    | -                   | This study            |
| MTD T 12119 | Germany: North Rhine-Westphalia: Brüchermühle                                | E           | h1            | h1              | 0.99                | -                    | -                   | This study            |
| MTD T 12120 | Germany: North Rhine-Westphalia: Brüchermühle                                | E           | h1            | h1              | 1.00                | -                    | -                   | This study            |
| MTD T 12121 | Germany: North Rhine-Westphalia: Brüchermühle                                | E           | h1            | h1              | 1.00                | -                    | -                   | This study            |
| MTD T 12122 | Germany: North Rhine-Westphalia: Brüchermühle                                | E           | h1            | h1              | 0.99                | -                    | -                   | This study            |
| MTD T 12123 | Germany: North Rhine-Westphalia: Brüchermühle                                | E           | h1            | -               | 1.00                | -                    | -                   | This study            |
| MTD T 12124 | Germany: North Rhine-Westphalia: Brüchermühle                                | E           | h1            | -               | 1.00                | -                    | -                   | This study            |
| MTD T 12125 | Germany: North Rhine-Westphalia: Brüchermühle                                | E           | h1            | h1              | 1.00                | -                    | -                   | This study            |
| MTD T 12126 | Germany: North Rhine-Westphalia: Brüchermühle                                | E           | h1            | h1              | 0.98                | -                    | -                   | This study            |
| MTD T 12127 | Germany: North Rhine-Westphalia: Brüchermühle                                | E           | h1            | h1              | 1.00                | -                    | -                   | This study            |
| MTD T 12128 | Germany: North Rhine-Westphalia: Brüchermühle                                | E           | h1            | -               | 1.00                | -                    | -                   | This study            |
| MTD T 14059 | Germany: North Rhine-Westphalia: Dortmund                                    | E           | h1            | h1              | 1.00                | -                    | -                   | This study            |
| MTD T 14060 | Germany: North Rhine-Westphalia: Dortmund                                    | E           | h1            | h1              | 1.00                | -                    | -                   | This study            |
| MTD T 11981 | Germany: North Rhine-Westphalia: Dortmund: Kirchderne                        | E           | h1            | h1              | 1.00                | -                    | -                   | This study            |
| ZFMK 86786  | Germany: North Rhine-Westphalia: Dove                                        | E           | h1            | -               | 1.00                | -                    | -                   | Kindler et al. (2013) |
| SMNS 14502  | Germany: North Rhine-Westphalia: Herfrah                                     | E           | h1            | h1              | 0.99                | -                    | -                   | This study            |
| MTD T 11786 | Germany: North Rhine-Westphalia: Herne                                       | E           | h1            | h1              | 0.98                | -                    | -                   | This study            |
| MTD T 12021 | Germany: North Rhine-Westphalia: Herne                                       | E           | h1            | -               | 0.98                | -                    | -                   | This study            |
| MTD T 12020 | Germany: North Rhine-Westphalia: Königswinter                                | E           | h10           | -               | 0.94                | -                    | -                   | This study            |
| ZFMK 82773  | Germany: North Rhine-Westphalia: Königswinter: Irenbach                      | E           | h1            | h17             | 0.98                | -                    | -                   | Kindler et al. (2013) |
| MTD T 11790 | Germany: North Rhine-Westphalia: Mettmann: Neandertal                        | 4           | r4            | -               | 0.00                | 0.94                 | -                   | This study            |
| MTD T 11809 | Germany: North Rhine-Westphalia: Mettmann: Neandertal                        | 4           | r4            | -               | 0.00                | 0.97                 | 0.23                | This study            |
| MTD T 11874 | Germany: North Rhine-Westphalia: Mettmann: Neandertal                        | 4           | r4            | r28             | 0.00                | 0.97                 | 0.23                | This study            |
| MTD T 11879 | Germany: North Rhine-Westphalia: Mettmann: Neandertal                        | 4           | r4            | -               | -                   | -                    | -                   | This study            |
| MTD T 11888 | Germany: North Rhine-Westphalia: Mettmann: Neandertal                        | 4           | r4            | r28             | 0.00                | 0.98                 | 0.05                | This study            |
| MTD T 11889 | Germany: North Rhine-Westphalia: Mettmann: Neandertal                        | 4           | r4            | r34             | 0.00                | 0.99                 | 0.17                | This study            |
| MTD T 11890 | Germany: North Rhine-Westphalia: Mettmann: Neandertal                        | 4           | r4            | r28             | 0.00                | 0.97                 | 0.21                | This study            |
| MTD T 11891 | Germany: North Rhine-Westphalia: Mettmann: Neandertal                        | 4           | r4            | -               | 0.00                | 0.96                 | 0.08                | This study            |
| MTD T 11892 | Germany: North Rhine-Westphalia: Mettmann: Neandertal                        | 4           | r4            | -               | 0.00                | 0.91                 | -                   | This study            |
| MTD T 11894 | Germany: North Rhine-Westphalia: Mettmann: Neandertal                        | 4           | r4            | -               | 0.00                | 0.97                 | 0.10                | This study            |
| MTD T 11895 | Germany: North Rhine-Westphalia: Mettmann: Neandertal                        | 4           | r4            | -               | 0.00                | 0.98                 | 0.06                | This study            |
| MTD T 11574 | Germany: North Rhine-Westphalia: Muech                                       | E           | h1            | h1              | 1.00                | -                    | -                   | This study            |
| MTD T 11575 | Germany: North Rhine-Westphalia: Muech                                       | E           | h1            | h1              | 1.00                | -                    | -                   | This study            |
| MTD T 11576 | Germany: North Rhine-Westphalia: Muech                                       | E           | h1            | h1              | 1.00                | -                    | -                   | This study            |
| MTD T 11577 | Germany: North Rhine-Westphalia: Muech                                       | E           | h1            | h1              | 0.99                | -                    | -                   | This study            |
| MTD T 14087 | Germany: North Rhine-Westphalia: near Dornagen: Knechtsteden Wald            | E           | h1            | h1              | 1.00                | -                    | -                   | This study            |
| MTD T 14088 | Germany: North Rhine-Westphalia: near Dornagen: Knechtsteden Wald            | E           | h1            | h1              | 1.00                | -                    | -                   | This study            |
| MTD T 14089 | Germany: North Rhine-Westphalia: near Dornagen: Knechtsteden Wald            | E           | h1            | -               | -                   | -                    | -                   | This study            |
| MTD T 14090 | Germany: North Rhine-Westphalia: near Dornagen: Knechtsteden Wald            | E           | -             | h1              | 1.00                | -                    | -                   | This study            |
| MTD T 14091 | Germany: North Rhine-Westphalia: near Dornagen: Knechtsteden Wald            | E           | h1            | -               | 1.00                | -                    | -                   | This study            |
| MTD T 14092 | Germany: North Rhine-Westphalia: near Dornagen: Knechtsteden Wald            | E           | h1            | h1              | 1.00                | -                    | -                   | This study            |
| MTD T 14094 | Germany: North Rhine-Westphalia: near Dornagen: Knechtsteden Wald            | E           | h1            | -               | 1.00                | -                    | -                   | This study            |
| MTD T 14095 | Germany: North Rhine-Westphalia: near Dornagen: Knechtsteden Wald            | E           | h1            | -               | 1.00                | -                    | -                   | This study            |
| MTD T 14096 | Germany: North Rhine-Westphalia: near Dornagen: Knechtsteden Wald            | E           | h1            | h1              | 1.00                | -                    | -                   | This study            |
| MTD T 14097 | Germany: North Rhine-Westphalia: near Dornagen: Knechtsteden Wald            | E           | h1            | -               | -                   | -                    | -                   | This study            |
| MTD T 14098 | Germany: North Rhine-Westphalia: near Dornagen: Knechtsteden Wald            | E           | h1            | -               | 1.00                | -                    | -                   | This study            |
| MTD T 14099 | Germany: North Rhine-Westphalia: near Dornagen: Knechtsteden Wald            | E           | h1            | -               | 1.00                | -                    | -                   | This study            |
| MTD T 14100 | Germany: North Rhine-Westphalia: near Dornagen: Knechtsteden Wald            | E           | h1            | h1              | 1.00                | -                    | -                   | This study            |
| MTD T 14101 | Germany: North Rhine-Westphalia: near Dornagen: Knechtsteden Wald            | E           | h1            | -               | 1.00                | -                    | -                   | This study            |
| MTD T 14103 | Germany: North Rhine-Westphalia: near Dornagen: Knechtsteden Wald            | E           | h1            | h1              | 1.00                | -                    | -                   | This study            |
| MTD T 14104 | Germany: North Rhine-Westphalia: near Dornagen: Knechtsteden Wald            | E           | h1            | -               | -                   | -                    | -                   | This study            |
| MTD T 14105 | Germany: North Rhine-Westphalia: near Dornagen: Knechtsteden Wald            | E           | h1            | h1              | 1.00                | -                    | -                   | This study            |
| MTD T 14106 | Germany: North Rhine-Westphalia: near Dornagen: Knechtsteden Wald            | E           | h1            | -               | 1.00                | -                    | -                   | This study            |
| MTD T 14107 | Germany: North Rhine-Westphalia: near Dornagen: Knechtsteden Wald            | E           | h1            | h1              | -                   | -                    | -                   | This study            |
| MTD T 14109 | Germany: North Rhine-Westphalia: near Dornagen: Knechtsteden Wald            | E           | h1            | -               | 1.00                | -                    | -                   | This study            |
| MTD T 14111 | Germany: North Rhine-Westphalia: near Dornagen: Knechtsteden Wald            | E           | h1            | h1              | 1.00                | -                    | -                   | This study            |
| MTD T 14485 | Germany: North Rhine-Westphalia: near Olpe: Friesenhagen                     | E           | h1            | h1              | 0.95                | -                    | -                   | This study            |
| ZFMK 83771  | Germany: North Rhine-Westphalia: Nideggen/Eifel                              | E           | h1            | h1              | 0.98                | -                    | -                   | Kindler et al. (2013) |
| MTD T 13972 | Germany: North Rhine-Westphalia: Rösrah                                      | E           | h1            | h1              | 0.99                | -                    | -                   | This study            |
| ZFMK 89086  | Germany: North Rhine-Westphalia: Sankt Augustin-Hangelar                     | E           | h1            | h1              | 0.96                | -                    | -                   | Kindler et al. (2013) |
| MTD T 11157 | Germany: North Rhine-Westphalia: Treisdorf                                   | E           | h1            | h1              | -                   | -                    | -                   | This study            |
| MTD T 11996 | Germany: North Rhine-Westphalia: Treisdorf                                   | E           | h1            | h1              | 1.00                | -                    | -                   | This study            |
| MTD T 14486 | Germany: North Rhine-Westphalia: Wesel                                       | E           | h1            | h1              | 0.97                | -                    | -                   | This study            |
| MTD T 11795 | Germany: North Rhine-Westphalia: Wuppertal: Kohlfurt                         | E           | h1            | h1              | 1.00                | -                    | -                   | This study            |
| MTD T 11873 | Germany: North Rhine-Westphalia: Wuppertal: Kohlfurt                         | E           | h1            | h1              | -                   | -                    | -                   | This study            |
| MTD T 11877 | Germany: North Rhine-Westphalia: Wuppertal: Kohlfurt                         | E           | h1            | -               | 0.97                | -                    | -                   | This study            |
| MTD T 11878 | Germany: North Rhine-Westphalia: Wuppertal: Kohlfurt                         | E           | h1            | h1              | 0.99                | -                    | -                   | This study            |
| MTD T 11880 | Germany: North Rhine-Westphalia: Wuppertal: Kohlfurt                         | E           | h1            | h1              | 1.00                | -                    | -                   | This study            |
| MTD T 11881 | Germany: North Rhine-Westphalia: Wuppertal: Kohlfurt                         | E           | h1            | h1              | 1.00                | -                    | -                   | This study            |
| MTD T 11883 | Germany: North Rhine-Westphalia: Wuppertal: Kohlfurt                         | E           | h1            | h1              | 1.00                | -                    | -                   | This study            |
| MTD T 11884 | Germany: North Rhine-Westphalia: Wuppertal: Kohlfurt                         | E           | h1            | -               | 0.96                | -                    | -                   | This study            |
| MTD T 11886 | Germany: North Rhine-Westphalia: Wuppertal: Kohlfurt                         | E           | h1            | h1              | 0.99                | -                    | -                   | This study            |
| MTD T 11887 | Germany: North Rhine-Westphalia: Wuppertal: Kohlfurt                         | E           | h1            | h1              | 1.00                | -                    | -                   | This study            |
| MTD T 11944 | Germany: North Rhine-Westphalia: Wuppertal: Kohlfurt                         | E           | h1            | h1              | 1.00                | -                    | -                   | This study            |
| MTD T 11985 | Germany: North Rhine-Westphalia: Wuppertal: Kohlfurt                         | E           | h1            | h1              | 1.00                | -                    | -                   | This study            |

• Table S1 continued

| Voucher     | Locality                                                             | mtDNA data  |               |                 | Microsatellite data |                      |                     | Reference             |
|-------------|----------------------------------------------------------------------|-------------|---------------|-----------------|---------------------|----------------------|---------------------|-----------------------|
|             |                                                                      | mtDNA clade | ND4 haplotype | cyt b haplotype | First STRUCTURE run | Second STRUCTURE run | Third STRUCTURE run |                       |
| MTD T 1207  | Germany: North Rhine-Westphalia: Wuppertal: Kohlfurt                 | E           | h1            | -               | 1.00                | -                    | -                   | This study            |
| MTD T 12043 | Germany: North Rhine-Westphalia: Wuppertal: Kohlfurt                 | E           | h1            | -               | -                   | -                    | -                   | This study            |
| MTD T 12045 | Germany: North Rhine-Westphalia: Wuppertal: Kohlfurt                 | E           | h1            | -               | 0.99                | -                    | -                   | This study            |
| MTD T 12048 | Germany: North Rhine-Westphalia: Wuppertal: Kohlfurt                 | E           | h1            | -               | 1.00                | -                    | -                   | This study            |
| MTD T 12049 | Germany: North Rhine-Westphalia: Wuppertal: Kohlfurt                 | E           | h1            | -               | 1.00                | -                    | -                   | This study            |
| MTD T 12050 | Germany: North Rhine-Westphalia: Wuppertal: Kohlfurt                 | E           | h1            | h1              | 0.99                | -                    | -                   | This study            |
| MTD T 12051 | Germany: North Rhine-Westphalia: Wuppertal: Kohlfurt                 | E           | h1            | h1              | 1.00                | -                    | -                   | This study            |
| MTD T 12052 | Germany: North Rhine-Westphalia: Wuppertal: Kohlfurt                 | E           | h1            | h1              | 1.00                | -                    | -                   | This study            |
| MTD T 12053 | Germany: North Rhine-Westphalia: Wuppertal: Kohlfurt                 | E           | h1            | h1              | 0.93                | -                    | -                   | This study            |
| MTD T 12054 | Germany: North Rhine-Westphalia: Wuppertal: Kohlfurt                 | E           | h1            | -               | 1.00                | -                    | -                   | This study            |
| ZFMK 73645  | Germany: North Rhine-Westphalia: Wuppertal: Morsbachtal              | E           | h1            | h1              | 1.00                | -                    | -                   | Kindler et al. (2013) |
| MTD T 12057 | Germany: North Rhine-Westphalia: Wuppertal: Neu-Dornap               | E           | h1            | -               | 1.00                | -                    | -                   | This study            |
| ZFMK 73646  | Germany: North Rhine-Westphalia: Wuppertal: Vorwerk                  | E           | h1            | h1              | 1.00                | -                    | -                   | Kindler et al. (2013) |
| MTD T 14838 | Germany: Rhineland-Palatinate: Altenahr                              | E           | h5            | h1              | -                   | -                    | -                   | This study            |
| MTD T 12042 | Germany: Rhineland-Palatinate: between Oberpleis and Eudenbach       | E           | h1            | -               | -                   | -                    | -                   | This study            |
| SMF 56593   | Germany: Rhineland-Palatinate: Bärdenbach                            | E           | h1            | h1              | 0.89                | -                    | -                   | This study            |
| SMNS 14504  | Germany: Rhineland-Palatinate: Gernersheim                           | E           | h1            | h1              | 1.00                | -                    | -                   | This study            |
| ZFMK 80876  | Germany: Rhineland-Palatinate: Lerhausen                             | E           | h1            | h1              | 0.92                | -                    | -                   | Kindler et al. (2013) |
| MTD D 35933 | Germany: Rhineland-Palatinate: Lieser                                | E           | h1            | h1              | 1.00                | -                    | -                   | Kindler et al. (2013) |
| ZFMK 83703  | Germany: Rhineland-Palatinate: Maria Laach                           | E           | h1            | h1              | -                   | -                    | -                   | Kindler et al. (2013) |
| SMF 73299   | Germany: Rhineland-Palatinate: Naamth                                | E           | h1            | h1              | 1.00                | -                    | -                   | This study            |
| MTD T 1573  | Germany: Rhineland-Palatinate: near Drei                             | E           | h1            | h1              | 1.00                | -                    | -                   | This study            |
| MTD T 11758 | Germany: Rhineland-Palatinate: near Linz: St. Katharinen             | E           | h1            | -               | -                   | -                    | -                   | This study            |
| SMF 71940   | Germany: Rhineland-Palatinate: SW Koblenz: between Macken and Burgin | E           | h1            | h1              | 0.99                | -                    | -                   | This study            |
| ZFMK 80875  | Germany: Rhineland-Palatinate: Wollersburg                           | E           | h1            | -               | 1.00                | -                    | -                   | Kindler et al. (2013) |
| ZFMK 54321  | Germany: Saarland: Hirschberg/Neunkirchen                            | E           | -             | b28             | 0.99                | -                    | -                   | Kindler et al. (2013) |
| MTD T 14481 | Germany: Saxony: Alzenberg: Bärenstein                               | 4           | r3            | r10             | 0.00                | 0.99                 | 0.82                | This study            |
| MTD D 39712 | Germany: Saxony: Bad Döben                                           | 3           | y1            | HF80028         | -                   | -                    | -                   | Kindler et al. (2013) |
| MTD D 39331 | Germany: Saxony: Bad Gottsche                                        | 4           | r3            | r17             | 0.00                | 0.98                 | 0.19                | Kindler et al. (2013) |
| MTD D 47231 | Germany: Saxony: Bürgsdorf                                           | 4           | r3            | r10             | 0.00                | 0.98                 | 0.49                | Kindler et al. (2013) |
| MTD T 10923 | Germany: Saxony: between Burkhardtswalde and Obermanzig              | 3           | y1            | y5              | 0.01                | 0.81                 | -                   | This study            |
| MTD T 14545 | Germany: Saxony: between Mohorn and Helbigsdorf                      | 4           | r4            | r34             | 0.00                | 0.99                 | 0.34                | This study            |
| MTD T 10997 | Germany: Saxony: between Volkendorf and Boxdorf                      | 4           | r28           | r10             | 0.00                | 0.98                 | 0.91                | This study            |
| MTD T 10998 | Germany: Saxony: between Volkendorf and Boxdorf                      | 4           | r3            | r10             | -                   | -                    | -                   | This study            |
| MTD T 3183  | Germany: Saxony: Biehla                                              | 3           | y1            | y6              | 0.00                | 0.98                 | 0.23                | Kindler et al. (2013) |
| MTD D 31066 | Germany: Saxony: Bioma                                               | 4           | r3            | r17             | 0.02                | 0.96                 | 0.15                | Kindler et al. (2013) |
| MWLK 19213  | Germany: Saxony: Burkau                                              | 3           | y2            | y5              | 0.00                | 0.98                 | 0.62                | This study            |
| MTD D 47317 | Germany: Saxony: Chemnitz                                            | 3           | y9            | y5              | 0.00                | 0.99                 | 0.64                | Kindler et al. (2013) |
| MTD D 47318 | Germany: Saxony: Chemnitz                                            | 3           | -             | y5              | 0.00                | 0.99                 | 0.93                | Kindler et al. (2013) |
| MWLK 80305  | Germany: Saxony: Cunnersdorf                                         | 4           | r3            | r10             | 0.00                | 0.94                 | -                   | This study            |
| MWLK 62605  | Germany: Saxony: Cunnersdorf: Biehla                                 | 3           | y2            | y5              | 0.00                | 0.99                 | 0.38                | Kindler et al. (2013) |
| MTD D 46238 | Germany: Saxony: Dahlen                                              | 3           | y1            | y5              | 0.00                | 0.96                 | 0.72                | Kindler et al. (2013) |
| MWLK 58811  | Germany: Saxony: Doben                                               | 3           | y1            | y6              | 0.00                | 0.98                 | 0.85                | This study            |
| MTD D 47638 | Germany: Saxony: Dorfhain                                            | 4           | r3            | r10             | 0.00                | 0.99                 | 0.65                | Kindler et al. (2013) |
| MTD D 45227 | Germany: Saxony: Dresden                                             | 4           | r3            | r27             | 0.00                | 0.97                 | 0.18                | Kindler et al. (2013) |
| MTD D 47639 | Germany: Saxony: Dresden                                             | 4           | r3            | r10             | 0.01                | 0.98                 | 0.75                | Kindler et al. (2013) |
| MTD D 47728 | Germany: Saxony: Dresden                                             | 3           | y1            | r10             | 0.00                | 0.99                 | 0.78                | Kindler et al. (2013) |
| MTD T 11539 | Germany: Saxony: Dresden                                             | 3           | y1            | r27             | 0.02                | 0.99                 | 0.86                | This study            |
| MTD T 13025 | Germany: Saxony: Dresden                                             | 4           | r3            | r10             | 0.00                | 0.99                 | 0.60                | This study            |
| MTD T 13090 | Germany: Saxony: Dresden                                             | 3           | y1            | r27             | 0.00                | 0.98                 | 0.65                | This study            |
| MTD T 14057 | Germany: Saxony: Dresden                                             | 4           | r3            | r10             | -                   | -                    | -                   | This study            |
| MTD T 14487 | Germany: Saxony: Dresden                                             | 4           | r3            | r10             | 0.00                | 0.99                 | 0.12                | This study            |
| MTD T 11159 | Germany: Saxony: Dresden: Airport                                    | 4           | r3            | r10             | 0.00                | 0.99                 | 0.87                | This study            |
| MTD T 12816 | Germany: Saxony: Dresden: Klotzsche                                  | 4           | r3            | r10             | 0.02                | 0.98                 | 0.77                | This study            |
| MTD T 12832 | Germany: Saxony: Dresden: Klotzsche                                  | 4           | r3            | r10             | 0.00                | 0.99                 | 0.79                | This study            |
| MWLK 7608   | Germany: Saxony: Dresden: Klotzsche                                  | 3           | y1            | r27             | -                   | -                    | -                   | This study            |
| MTD D 48178 | Germany: Saxony: Dresden: Langbrück                                  | 4           | r4            | r34             | 0.00                | 0.98                 | 0.57                | Kindler et al. (2013) |
| MTD T 12835 | Germany: Saxony: Dresden: Langbrück                                  | 3           | y1            | r27             | 0.00                | 0.98                 | 0.22                | This study            |
| MWLK 66511  | Germany: Saxony: Dresden: Langbrück                                  | 3           | y1            | -               | -                   | -                    | -                   | This study            |
| MTD D 47258 | Germany: Saxony: Dresden: Weisdorf                                   | 4           | r3            | r10             | 0.02                | 0.98                 | 0.87                | Kindler et al. (2013) |
| MTD D 48756 | Germany: Saxony: Dresden: Weisdorf                                   | 3           | y1            | r27             | 0.00                | 0.99                 | 0.76                | This study            |
| MWLK 25008  | Germany: Saxony: Droben                                              | 3           | y1            | y8              | 0.00                | 0.99                 | 0.40                | This study            |
| MWLK 39901  | Germany: Saxony: Dübzig - Schreckthal                                | 3           | y1            | y6              | -                   | -                    | -                   | This study            |
| MWLK 5104   | Germany: Saxony: Dübziger Moor                                       | 3           | y1            | y6              | 0.00                | 0.98                 | 0.58                | Kindler et al. (2013) |
| MWLK 43208  | Germany: Saxony: Fischbach                                           | 4           | r3            | r10             | 0.00                | 0.99                 | 0.31                | This study            |
| MWLK 26508  | Germany: Saxony: Groß Neida                                          | 3           | y1            | y5              | 0.00                | 0.98                 | 0.55                | This study            |
| MWLK 26608  | Germany: Saxony: Groß Neida                                          | 3           | y1            | -               | 0.00                | 0.99                 | 0.40                | This study            |
| MTD D 38701 | Germany: Saxony: Großlittmunsdorf                                    | 4           | -             | r34             | -                   | -                    | -                   | Kindler et al. (2013) |
| MWLK 37004  | Germany: Saxony: Großlittmunsdorf                                    | 4           | r3            | r10             | -                   | -                    | -                   | Kindler et al. (2013) |
| MWLK 77605  | Germany: Saxony: Guttau                                              | 3           | y1            | y5              | 0.00                | 0.92                 | -                   | Kindler et al. (2013) |
| MTD D 47002 | Germany: Saxony: Hartmanngrün                                        | 3           | -             | y5              | 0.00                | 0.99                 | 0.67                | This study            |
| MTD T 17523 | Germany: Saxony: Helbigsdorf                                         | 3           | y4            | r59             | 0.00                | 0.99                 | 0.88                | This study            |
| MWLK 79405  | Germany: Saxony: Jätschiba                                           | 3           | y1            | y5              | 0.01                | 0.93                 | -                   | This study            |
| MWLK 18212  | Germany: Saxony: Karmatz                                             | 3           | y2            | y5              | 0.00                | 0.97                 | 0.29                | Kindler et al. (2013) |
| MWLK 46605  | Germany: Saxony: Karmatz                                             | 4           | r3            | -               | 0.00                | 0.99                 | 0.46                | Kindler et al. (2013) |
| MWLK 98805  | Germany: Saxony: Karmatz                                             | 3           | y2            | y5              | 0.00                | 0.97                 | 0.26                | Kindler et al. (2013) |
| MTD T 10924 | Germany: Saxony: Karsdorf                                            | 4           | r3            | r10             | 0.00                | 0.99                 | 0.61                | This study            |
| MTD T 10925 | Germany: Saxony: Karsdorf                                            | 4           | r3            | r10             | 0.01                | 0.99                 | 0.26                | This study            |
| MTD T 10926 | Germany: Saxony: Karsdorf                                            | 3           | y1            | y5              | 0.01                | 0.98                 | 0.69                | This study            |
| MTD T 10927 | Germany: Saxony: Karsdorf                                            | 4           | r3            | r10             | -                   | -                    | -                   | This study            |
| MTD T 10928 | Germany: Saxony: Karsdorf                                            | 4           | r3            | r10             | -                   | -                    | -                   | This study            |
| MTD T 10929 | Germany: Saxony: Karsdorf                                            | 4           | r4            | r34             | 0.01                | 0.99                 | 0.22                | This study            |
| MTD T 10930 | Germany: Saxony: Karsdorf                                            | 3           | y1            | y5              | 0.01                | 0.98                 | 0.62                | This study            |
| MTD T 10932 | Germany: Saxony: Karsdorf                                            | 4           | r4            | r34             | 0.00                | 0.99                 | 0.90                | This study            |
| MTD T 10933 | Germany: Saxony: Karsdorf                                            | 4           | r3            | r17             | 0.00                | 0.99                 | 0.30                | This study            |
| MTD T 10934 | Germany: Saxony: Karsdorf                                            | 4           | r3            | r10             | -                   | -                    | -                   | This study            |
| MTD T 10843 | Germany: Saxony: Kleba                                               | 4           | r3            | r10             | 0.00                | 0.90                 | -                   | This study            |
| MTD T 14350 | Germany: Saxony: Klingenberg                                         | 4           | r3            | r10             | 0.00                | 0.98                 | 0.20                | This study            |
| MTD T 14351 | Germany: Saxony: Klingenberg                                         | 4           | r4            | r34             | 0.00                | 0.99                 | 0.14                | This study            |
| MTD T 14444 | Germany: Saxony: Klingenberg                                         | 4           | r3            | r10             | 0.00                | 0.99                 | 0.83                | This study            |
| MTD T 14445 | Germany: Saxony: Klingenberg                                         | 4           | r3            | r10             | 0.00                | 0.98                 | 0.09                | This study            |
| MTD D 40611 | Germany: Saxony: Kreischa-Lockmitel                                  | 4           | r3            | r10             | 0.00                | 0.99                 | 0.61                | Kindler et al. (2013) |
| MTD D 45996 | Germany: Saxony: Lauterbach                                          | 3           | -             | y5              | 0.00                | 0.99                 | 0.95                | Kindler et al. (2013) |
| MTD T 9528  | Germany: Saxony: Lengfeld / Neunzehnhain                             | 4           | r3            | r11             | 0.00                | 0.98                 | 0.73                | Kindler et al. (2013) |
| MWLK 34310  | Germany: Saxony: Liebigast                                           | 3           | y1            | r27             | 0.01                | 0.99                 | 0.86                | This study            |
| MTD D 48837 | Germany: Saxony: Liegau-Augustusbad                                  | 4           | r3            | r10             | 0.00                | 0.99                 | 0.20                | This study            |
| MTD T 10999 | Germany: Saxony: Liegau-Augustusbad                                  | 4           | r3            | r10             | 0.00                | 0.99                 | 0.22                | This study            |
| MTD T 11227 | Germany: Saxony: Liegau-Augustusbad                                  | 4           | r3            | r10             | 0.00                | 0.98                 | 0.50                | This study            |
| MTD T 11461 | Germany: Saxony: Liegau-Augustusbad                                  | 4           | r3            | r10             | 0.00                | 0.97                 | 0.30                | This study            |
| MTD T 12782 | Germany: Saxony: Liegau-Augustusbad                                  | 3           | y1            | r27             | 0.00                | 0.98                 | 0.28                | This study            |
| MTD T 13332 | Germany: Saxony: Liegau-Augustusbad                                  | 3           | y1            | r27             | 0.00                | 0.97                 | 0.33                | This study            |
| MWLK 7601   | Germany: Saxony: Linz                                                | 4           | r3            | r10             | 0.00                | 0.99                 | 0.52                | Kindler et al. (2013) |
| MTD T 10936 | Germany: Saxony: Meilingen                                           | 3           | y1            | r27             | 0.00                | 0.98                 | 0.35                | This study            |
| MTD T 11106 | Germany: Saxony: Meifen                                              | 3           | y1            | y5              | 0.08                | -                    | -                   | This study            |
| MTD T 11107 | Germany: Saxony: Meifen                                              | 4           | r3            | r10             | 0.00                | 0.99                 | 0.95                | This study            |
| MTD T 11108 | Germany: Saxony: Meifen                                              | 4           | r3            | r10             | 0.00                | 0.98                 | 0.26                | This study            |
| MTD T 11396 | Germany: Saxony: Meifen                                              | 4           | r3            | r10             | 0.00                | 0.98                 | 0.20                | This study            |
| MTD T 11397 | Germany: Saxony: Meifen                                              | 3           | y1            | y5              | 0.00                | 0.99                 | 0.56                | This study            |
| MTD T 11398 | Germany: Saxony: Meifen                                              | 4           | r3            | r14             | 0.00                | 0.98                 | 0.66                | This study            |
| MTD T 11400 | Germany: Saxony: Meifen                                              | 4           | r3            | r14             | -                   | -                    | -                   | This study            |
| MWLK 37101  | Germany: Saxony: Michalken                                           | 3           | y1            | y5              | 0.00                | 0.98                 | 0.22                | Kindler et al. (2013) |
| MWLK 37201  | Germany: Saxony: Michalken                                           | 3           | y1            | y6              | 0.00                | 0.97                 | 0.45                | Kindler et al. (2013) |
| MWLK 62407  | Germany: Saxony: Michalken                                           | 3           | y1            | y5              | 0.01                | 0.99                 | 0.51                | This study            |
| MTD D 45906 | Germany: Saxony: Milkel                                              | 3           | y1            | y6              | -                   | -                    | -                   | Kindler et al. (2013) |
| MWLK 79305  | Germany: Saxony: Milkel                                              | 3           | y1            | y8              | 0.00                | 0.98                 | 0.35                | This study            |
| MWLK 103205 | Germany: Saxony: Mönau                                               | 3           | y1            | y5              | 0.00                | 0.99                 | 0.92                | This study            |
| MWLK 104905 | Germany: Saxony: Mönau                                               | 3           | y1            | y5              | 0.01                | 0.96                 | 0.20                | This study            |
| MTD T 10770 | Germany: Saxony: Moritzburg                                          | 4           | r4            | r34             | 0.01                | 0.73                 | -                   | This study            |
| MTD T 10771 | Germany: Saxony: Moritzburg                                          | 4           | r4            | r34             | 0.00                | 0.99                 | 0.71                | This study            |
| MTD T 10772 | Germany: Saxony: Moritzburg                                          | 4           | r4            | r44             | 0.01                | 0.99                 | 0.58                | This study            |
| MTD T 10773 | Germany: Saxony: Moritzburg                                          | 3           | y1            | r54             | 0.01                | 0.99                 | 0.92                | This study            |
| MTD T 10774 | Germany: Saxony: Moritzburg                                          | 3           | y1            | r54             | 0.00                | 0.92                 | -                   | This study            |
| MTD T 11031 | Germany: Saxony: Moritzburg                                          | 4           | r3            | r10             | 0.00                | 0.99                 | 0.39                | This study            |
| MTD T 11032 | Germany: Saxony: Moritzburg                                          | 4           | r4            | r34             | 0.01                | 0.98                 | 0.32                | This study            |

• Table S1 continued

| Voucher       | Locality                                                    | mtDNA data  |               |                 | Microsatellite data |                      |                     | Reference             |
|---------------|-------------------------------------------------------------|-------------|---------------|-----------------|---------------------|----------------------|---------------------|-----------------------|
|               |                                                             | mtDNA clade | ND4 haplotype | cyt b haplotype | First STRUCTURE run | Second STRUCTURE run | Third STRUCTURE run |                       |
| MTD T 11033   | Germany: Saxony: Moritzburg                                 | 4           | r4            | r4              | 0.00                | 0.99                 | 0.10                | This study            |
| MTD T 11035   | Germany: Saxony: Moritzburg                                 | 4           | r4            | r4              | 0.00                | 0.99                 | 0.92                | This study            |
| MWLK 665/11   | Germany: Saxony: Namborf                                    | 4           | r5            | r10             | 0.01                | 0.98                 | 0.75                | This study            |
| MTD T 11395   | Germany: Saxony: near Dresden                               | 3           | y1            | y27             | 0.01                | 0.93                 | -                   | This study            |
| MWLK 105/01   | Germany: Saxony: Neudorf                                    | 3           | y1            | y5              | 0.00                | 0.96                 | 0.73                | This study            |
| MWLK 311/05   | Germany: Saxony: Neukirch                                   | 3           | y1            | y7              | 0.00                | 0.95                 | 0.25                | Kindler et al. (2013) |
| MTD D 47429   | Germany: Saxony: Oberschöna                                 | 4           | r3            | r10             | -                   | -                    | -                   | Kindler et al. (2013) |
| MTD D 32501   | Germany: Saxony: Oppach                                     | 3           | y1            | y7              | -                   | -                    | -                   | Kindler et al. (2013) |
| MWLK 141/09   | Germany: Saxony: Oppitz                                     | 3           | y1            | y19             | 0.01                | 0.98                 | 0.33                | This study            |
| MTD D 42679   | Germany: Saxony: Ottendorf Okrilla                          | 3           | y1            | y7              | 0.00                | 0.99                 | 0.63                | Kindler et al. (2013) |
| MTD T 11222   | Germany: Saxony: Ottendorf Okrilla                          | 3           | y1            | y6              | -                   | -                    | -                   | This study            |
| MTD T 14857   | Germany: Saxony: Pirka: dam                                 | 3           | y9            | y5              | 0.00                | 0.98                 | 0.50                | This study            |
| MWLK 378/10   | Germany: Saxony: Prachenau                                  | 3           | y1            | y7              | 0.00                | 0.98                 | 0.74                | This study            |
| MWLK 297/10   | Germany: Saxony: Pulsnitz                                   | 4           | r3            | r10             | 0.00                | 0.82                 | -                   | This study            |
| MWLK 284/99   | Germany: Saxony: Rehdorf                                    | 3           | y2            | y5              | 0.00                | 0.99                 | 0.53                | Kindler et al. (2013) |
| MTD T 13915   | Germany: Saxony: Rietschen                                  | 3           | y3            | y5              | 0.00                | 0.99                 | 0.60                | This study            |
| MTD T 13916   | Germany: Saxony: Rietschen                                  | 3           | y41           | y5              | 0.00                | 0.98                 | 0.49                | This study            |
| MWLK 194/09   | Germany: Saxony: Röhndorf                                   | 4           | r3            | r10             | 0.00                | 0.91                 | -                   | This study            |
| MWLK 68/02    | Germany: Saxony: Schöna                                     | 3           | y1            | y19             | 0.00                | 0.98                 | 0.25                | This study            |
| MWLK 1486/06  | Germany: Saxony: Schönbach-Bulleritz                        | 3           | y2            | y5              | 0.00                | 0.99                 | 0.29                | This study            |
| MTD T 11030   | Germany: Saxony: Schönborn                                  | 3           | y1            | y6              | 0.00                | 0.99                 | 0.06                | This study            |
| MWLK 53/04    | Germany: Saxony: Schwenepitz                                | 3           | y3            | y5              | 0.00                | 0.95                 | 0.39                | Kindler et al. (2013) |
| MTD T 12833   | Germany: Saxony: Seitz                                      | 4           | r4            | r10             | 0.01                | 0.98                 | 0.86                | This study            |
| MWLK 137/12   | Germany: Saxony: Skalka                                     | 3           | y1            | y6              | 0.00                | 0.97                 | 0.46                | This study            |
| MWLK 294/12   | Germany: Saxony: Skalka                                     | 3           | y1            | y6              | 0.00                | 0.98                 | 0.93                | This study            |
| MWLK 687/11   | Germany: Saxony: Skalka                                     | 3           | y1            | y5              | 0.01                | 0.99                 | 0.77                | This study            |
| MWLK 537/11   | Germany: Saxony: Steinitz                                   | 3           | y1            | y5              | 0.00                | 0.90                 | -                   | This study            |
| MWLK 483/07   | Germany: Saxony: Straßgrüben                                | 3           | y2            | y5              | 0.00                | 0.99                 | 0.25                | This study            |
| MWLK 795/05   | Germany: Saxony: Teicha                                     | 3           | -             | y5              | 0.00                | 0.97                 | 0.13                | Kindler et al. (2013) |
| MTD T 13015   | Germany: Saxony: Tharandt                                   | 4           | r3            | r10             | 0.00                | 0.99                 | 0.19                | This study            |
| MWLK 1047/05  | Germany: Saxony: Treugebblä                                 | 3           | y14           | y5              | 0.00                | 0.98                 | 0.76                | This study            |
| MWLK 10/13    | Germany: Saxony: Ubyst - Mönau                              | 3           | y32           | y7              | 0.00                | 0.96                 | 0.72                | This study            |
| MWLK 447/11   | Germany: Saxony: Ubyst - Mönau                              | 3           | y1            | y5              | 0.00                | 0.99                 | 0.61                | This study            |
| MTD T 12185   | Germany: Saxony: w Niesky                                   | 3           | -             | y5              | 0.00                | 0.98                 | 0.77                | This study            |
| MTD D 42680   | Germany: Saxony: Waldenberg                                 | 3           | y1            | y15             | 0.00                | 0.99                 | 0.73                | Kindler et al. (2013) |
| MWLK 1050/05  | Germany: Saxony: Wartha-Steinitz                            | 3           | y26           | y6              | 0.00                | 0.90                 | -                   | This study            |
| MWLK 115/09   | Germany: Saxony: Weinbilla                                  | 3           | y1            | y1              | 0.01                | 0.99                 | 0.74                | This study            |
| MTD T 10775   | Germany: Saxony: Wermdorf                                   | 3           | y1            | y5              | 0.00                | 0.97                 | 0.47                | This study            |
| MTD T 10994   | Germany: Saxony: Wermdorf                                   | 3           | y1            | y5              | 0.00                | 0.99                 | 0.81                | This study            |
| MTD T 10995   | Germany: Saxony: Wermdorf                                   | 4           | r3            | -               | 0.00                | 0.98                 | 0.60                | This study            |
| MTD T 10996   | Germany: Saxony: Wermdorf                                   | 4           | r3            | r10             | 0.00                | 0.98                 | 0.35                | This study            |
| MTD T 11223   | Germany: Saxony: Wermdorf                                   | 4           | r3            | r10             | 0.00                | 0.83                 | -                   | This study            |
| MWLK 815/05   | Germany: Saxony: Wülthenau                                  | 3           | y1            | y5              | 0.00                | 0.99                 | 0.11                | This study            |
| MTD D 44148   | Germany: Saxony: Auhalt: Altenbrink                         | 3           | y1            | y5              | 0.00                | 0.97                 | 0.13                | Kindler et al. (2013) |
| MTD T 1579    | Germany: Saxony: Auhalt: near Kriebitzlar: Lake Gettelhal   | 3           | y1            | y17             | 0.01                | 0.98                 | 0.84                | Kindler et al. (2013) |
| ZFMK 80987    | Germany: Saxony: Auhalt: Saagenhansen                       | 3           | y1            | y5              | 0.00                | 0.95                 | 0.64                | This study            |
| MTD T 14072   | Germany: Schleswig-Holstein: Bad Bramstedt                  | 3           | y1            | y19             | 0.00                | 0.99                 | 0.92                | Kindler et al. (2013) |
| ZMH R09486    | Germany: Schleswig-Holstein: Bargteheide                    | -           | -             | -               | 0.08                | -                    | -                   | This study            |
| ZMH R09497    | Germany: Schleswig-Holstein: Bargteheide                    | 3           | y1            | y20             | 0.01                | 0.99                 | 0.85                | This study            |
| ZMH R09855    | Germany: Schleswig-Holstein: Bargteheide                    | 3           | y1            | y20             | 0.00                | 0.99                 | 0.87                | This study            |
| ZMH R11001    | Germany: Schleswig-Holstein: Bargteheide                    | 3           | y1            | y20             | 0.02                | 0.99                 | 0.90                | This study            |
| MTD T 14846   | Germany: Schleswig-Holstein: Bark: Barker Heide             | 3           | y1            | y20             | 0.01                | 0.95                 | 0.66                | This study            |
| MTD T 14847   | Germany: Schleswig-Holstein: Dägelung: Heide Nordsee        | 3           | y1            | y20             | 0.01                | 0.94                 | -                   | This study            |
| MTD T 14070   | Germany: Schleswig-Holstein: Daddorf: Kiebitzholmer Moor    | 3           | y1            | y20             | 0.01                | 0.98                 | 0.96                | This study            |
| MTD T 14845   | Germany: Schleswig-Holstein: Dägen                          | 3           | y11           | y20             | 0.01                | 0.98                 | 0.67                | This study            |
| ZMH R09946    | Germany: Schleswig-Holstein: Dithmarschen                   | 3           | y1            | -               | -                   | -                    | -                   | This study            |
| MTD T 14073   | Germany: Schleswig-Holstein: Felm: Kallendorfer Moor        | 3           | y1            | y21             | 0.02                | 0.99                 | 0.91                | This study            |
| MTD T 14074   | Germany: Schleswig-Holstein: Felm: Kallendorfer Moor        | 3           | y1            | y21             | 0.00                | 0.99                 | 0.94                | This study            |
| MTD T 14848   | Germany: Schleswig-Holstein: Felm: Kallendorfer Moor        | 3           | y1            | y21             | 0.00                | 0.99                 | 0.94                | This study            |
| MTD T 14071   | Germany: Schleswig-Holstein: Gröbham                        | 3           | y11           | -               | 0.01                | 0.96                 | 0.89                | This study            |
| MTD T 14066   | Germany: Schleswig-Holstein: Hamdorf                        | 3           | y11           | y20             | 0.00                | 0.99                 | 0.88                | This study            |
| MTD T 14069   | Germany: Schleswig-Holstein: Hamdorf                        | 3           | y1            | y20             | 0.01                | 0.98                 | 0.83                | This study            |
| ZFMK 85184    | Germany: Schleswig-Holstein: Kiel: Elmshagen                | 3           | y1            | y20             | 0.00                | 0.99                 | 0.95                | Kindler et al. (2013) |
| ZFMK 62405    | Germany: Schleswig-Holstein: Kiel: Landwehr                 | 3           | y1            | HF680066        | 0.00                | 0.99                 | 0.82                | Kindler et al. (2013) |
| MTD T 13934   | Germany: Schleswig-Holstein: Klein Rönkau                   | 3           | y1            | -               | 0.00                | 0.99                 | 0.95                | This study            |
| ZMH R09338    | Germany: Schleswig-Holstein: Langenhorst                    | 3           | y1            | y19             | 0.00                | 0.99                 | 0.95                | This study            |
| MTD T 14068   | Germany: Schleswig-Holstein: Lübeck: Grönauer Heide         | 3           | y1            | y20             | 0.00                | 0.99                 | 0.92                | This study            |
| MTD T 13935   | Germany: Schleswig-Holstein: Lübeck: Schellbruch            | 3           | y1            | y20             | 0.01                | 0.95                 | 0.85                | This study            |
| MTD T 13936   | Germany: Schleswig-Holstein: Lübeck: Schellbruch            | 3           | y1            | y20             | 0.01                | 0.99                 | 0.96                | This study            |
| MTD T 14063   | Germany: Schleswig-Holstein: Osterfeld                      | 3           | y1            | y21             | 0.00                | 0.99                 | 0.92                | This study            |
| ZFMK 92335    | Germany: Schleswig-Holstein: Probstel: Hugner Moor          | 3           | y1            | y41             | 0.00                | 0.99                 | 0.80                | Kindler et al. (2013) |
| ZFMK 72639    | Germany: Schleswig-Holstein: Probstel: Probstelheide        | 3           | y1            | y41             | 0.00                | 0.99                 | 0.87                | Kindler et al. (2013) |
| ZMH R04381    | Germany: Schleswig-Holstein: Rendsburg-Eckernförde: Wandler | 3           | y1            | y5              | 0.00                | 0.99                 | 0.76                | This study            |
| MTD T 14064   | Germany: Schleswig-Holstein: Sehestedt                      | 3           | y1            | y20             | 0.00                | 0.99                 | 0.95                | This study            |
| NME R 0409/02 | Germany: Thuringia: Cospeida                                | 3           | y1            | y5              | 0.00                | 0.99                 | 0.45                | This study            |
| NME R 0445/04 | Germany: Thuringia: Erfurt: Rhoda                           | 3           | y1            | y5              | 0.00                | 0.97                 | 0.76                | This study            |
| NME R 0507/07 | Germany: Thuringia: Erfurt: Rhoda                           | 3           | y1            | y5              | 0.00                | 0.99                 | 0.53                | This study            |
| NME R 0556/08 | Germany: Thuringia: Erfurt: Rhoda                           | 3           | y1            | y5              | 0.00                | 0.98                 | 0.69                | This study            |
| NME R 0606/11 | Germany: Thuringia: Geroda                                  | 3           | y1            | y5              | 0.00                | 0.98                 | 0.84                | This study            |
| NME R 0793/13 | Germany: Thuringia: Großheringen                            | 3           | y1            | y5              | 0.00                | 0.97                 | 0.93                | This study            |
| NME R 0956/14 | Germany: Thuringia: Heroldsdorf                             | 3           | y1            | y5              | -                   | -                    | -                   | This study            |
| NME R 0415/02 | Germany: Thuringia: Rotheud                                 | 3           | y1            | y16             | 0.00                | 0.99                 | 0.11                | This study            |
| MTD T 12792   | Germany: Thuringia: Schönbach dam                           | 3           | y1            | y4              | 0.00                | 0.98                 | 0.83                | This study            |
| NME R 0253/99 | Germany: Thuringia: Triebes                                 | 3           | y1            | y5              | -                   | -                    | -                   | This study            |
| NME R 0676/10 | Germany: Thuringia: Triebes                                 | 3           | y1            | y5              | 0.00                | 0.98                 | 0.55                | This study            |
| NME R 0495/06 | Germany: Thuringia: Ubsdahl: Kirchbühl                      | 3           | y1            | -               | -                   | -                    | -                   | This study            |
| NME R 0890/13 | Germany: Thuringia: Wandersleben                            | 3           | y1            | y24             | 0.06                | -                    | -                   | This study            |
| NME R 0413/02 | Germany: Thuringia: Zeulenroda-Triebes                      | 3           | y9            | y5              | 0.00                | 0.99                 | 0.59                | This study            |
| MTD T 14169   | Great Britain                                               | E           | h1            | h21             | -                   | -                    | -                   | This study            |
| MTD T 14807   | Great Britain: Brecklands area of Norfolk: near Theford     | E           | h1            | -               | -                   | -                    | -                   | This study            |
| MTD T 14808   | Great Britain: Brecklands area of Norfolk: near Theford     | E           | h1            | h7              | 1.00                | -                    | -                   | This study            |
| MTD T 14809   | Great Britain: Brecklands area of Norfolk: near Theford     | E           | h1            | h1              | 1.00                | -                    | -                   | This study            |
| MTD T 14810   | Great Britain: Brecklands area of Norfolk: near Theford     | E           | h1            | h1              | 1.00                | -                    | -                   | This study            |
| MTD T 14811   | Great Britain: Brecklands area of Norfolk: near Theford     | E           | h1            | h1              | 1.00                | -                    | -                   | This study            |
| MTD T 14812   | Great Britain: Brecklands area of Norfolk: near Theford     | E           | h1            | h1              | 1.00                | -                    | -                   | This study            |
| MTD T 14130   | Great Britain: Buckinghamshire: Chesham                     | E           | h1            | h1              | 1.00                | -                    | -                   | This study            |
| MTD T 14144   | Great Britain: Derbyshire: Eryps                            | E           | h1            | -               | 1.00                | -                    | -                   | This study            |
| MTD T 14165   | Great Britain: Dorset                                       | E           | h1            | h1              | 1.00                | -                    | -                   | This study            |
| MTD T 14166   | Great Britain: Dorset                                       | E           | h1            | h1              | 0.99                | -                    | -                   | This study            |
| MTD T 14131   | Great Britain: Dorset: Bovington                            | E           | h6            | -               | -                   | -                    | -                   | This study            |
| MTD T 14132   | Great Britain: Dorset: Christchurch                         | E           | h1            | h1              | 0.99                | -                    | -                   | This study            |
| MTD T 14117   | Great Britain: Essex: Loughton                              | E           | h1            | h1              | 1.00                | -                    | -                   | This study            |
| MTD T 14118   | Great Britain: Essex: Loughton                              | E           | h1            | h1              | 1.00                | -                    | -                   | This study            |
| MTD T 14119   | Great Britain: Essex: Loughton                              | E           | h1            | h1              | 1.00                | -                    | -                   | This study            |
| MTD T 14120   | Great Britain: Essex: Loughton                              | E           | h1            | h1              | 1.00                | -                    | -                   | This study            |
| MTD T 14121   | Great Britain: Essex: Loughton                              | E           | h1            | h1              | 1.00                | -                    | -                   | This study            |
| MTD T 14122   | Great Britain: Essex: Loughton                              | E           | h1            | h1              | 1.00                | -                    | -                   | This study            |
| MTD T 14136   | Great Britain: Gloucestershire: Milkwall                    | E           | h1            | h1              | 1.00                | -                    | -                   | This study            |
| MTD T 14124   | Great Britain: Hereford: 4km E Ledbury                      | E           | h1            | h1              | 1.00                | -                    | -                   | This study            |
| MTD T 14123   | Great Britain: Hereford: Ledbury                            | E           | h2            | h1              | 1.00                | -                    | -                   | This study            |
| MTD T 14139   | Great Britain: Herefordshire: Abbey Dore                    | E           | h1            | h1              | 1.00                | -                    | -                   | This study            |
| MTD T 14167   | Great Britain: Herefordshire: Hatfield                      | E           | h1            | -               | 1.00                | -                    | -                   | This study            |
| MTD T 14137   | Great Britain: Herefordshire: Tedstone Wafre                | E           | h1            | h21             | 0.97                | -                    | -                   | This study            |
| MTD T 13012   | Great Britain: Hull                                         | E           | h6            | h1              | 1.00                | -                    | -                   | This study            |
| MTD T 13011   | Great Britain: Hull                                         | E           | h6            | h1              | 1.00                | -                    | -                   | This study            |
| MTD T 14133   | Great Britain: Kent: Hildenborough                          | E           | h1            | -               | 1.00                | -                    | -                   | This study            |
| MTD T 14126   | Great Britain: near Scotland                                | E           | h1            | h1              | -                   | -                    | -                   | This study            |
| MTD T 14127   | Great Britain: near Scotland                                | E           | h1            | h1              | -                   | -                    | -                   | This study            |
| MTD T 14128   | Great Britain: near Scotland                                | E           | h1            | h1              | -                   | -                    | -                   | This study            |
| MTD T 14121   | Great Britain: Norfolk: Aylsham                             | E           | -             | h1              | 1.00                | -                    | -                   | This study            |
| MTD T 14116   | Great Britain: Norfolk: City Cane                           | E           | h1            | h1              | 1.00                | -                    | -                   | This study            |
| MTD T 9982    | Great Britain: North Wales: Gwaith Powder                   | E           | h1            | -               | 1.00                | -                    | -                   | Kindler et al. (2013) |
| MTD T 9983    | Great Britain: North Wales: Gwaith Powder                   | E           | h1            | -               | 1.00                | -                    | -                   | Kindler et al. (2013) |

• Table S1 continued

| Voucher     | Locality                                                     | mtDNA data  |               |                 | Microsatellite data |                      |                     | Reference             |
|-------------|--------------------------------------------------------------|-------------|---------------|-----------------|---------------------|----------------------|---------------------|-----------------------|
|             |                                                              | mtDNA clade | ND4 haplotype | cyt b haplotype | First STRUCTURE run | Second STRUCTURE run | Third STRUCTURE run |                       |
| MTD T 14141 | Great Britain: Northamptonshire: Sywell                      | E           | h1            | -               | 1.00                | -                    | -                   | This study            |
| MTD T 14140 | Great Britain: Nottinghamshire: Jackdale                     | E           | h1            | h1              | 1.00                | -                    | -                   | This study            |
| MTD T 14113 | Great Britain: Penbrokehire: Taberny                         | E           | h1            | -               | 0.92                | -                    | -                   | This study            |
| MTD T 14142 | Great Britain: Staffordshire: between Wombourne and Sedgeley | E           | h1            | h1              | 1.00                | -                    | -                   | This study            |
| MTD T 14163 | Great Britain: Suffolk: Martlesham                           | E           | h1            | h1              | 1.00                | -                    | -                   | This study            |
| MTD T 14164 | Great Britain: Suffolk: Martlesham                           | E           | h1            | h1              | 1.00                | -                    | -                   | This study            |
| MTD T 14134 | Great Britain: Surrey: Milford                               | E           | h1            | h1              | 1.00                | -                    | -                   | This study            |
| MTD T 14147 | Great Britain: Surrey: Newdigate                             | C           | c1            | c1              | 0.98                | -                    | -                   | This study            |
| MTD T 14148 | Great Britain: Surrey: Newdigate                             | E           | h1            | h1              | 0.73                | -                    | -                   | This study            |
| MTD T 14149 | Great Britain: Surrey: Newdigate                             | E           | h1            | h21             | 0.96                | -                    | -                   | This study            |
| MTD T 14150 | Great Britain: Surrey: Newdigate                             | E           | h1            | h1              | 0.99                | -                    | -                   | This study            |
| MTD T 14151 | Great Britain: Surrey: Newdigate                             | E           | h8            | h1              | 0.90                | -                    | -                   | This study            |
| MTD T 14152 | Great Britain: Surrey: Newdigate                             | C           | c1            | c1              | 0.84                | -                    | -                   | This study            |
| MTD T 14153 | Great Britain: Surrey: Newdigate                             | C           | c1            | c1              | 1.00                | -                    | -                   | This study            |
| MTD T 14154 | Great Britain: Surrey: Newdigate                             | E           | h1            | h21             | 0.99                | -                    | -                   | This study            |
| MTD T 14155 | Great Britain: Surrey: Newdigate                             | E           | h8            | h1              | 0.98                | -                    | -                   | This study            |
| MTD T 14156 | Great Britain: Surrey: Newdigate                             | E           | h1            | h21             | 0.98                | -                    | -                   | This study            |
| MTD T 14157 | Great Britain: Surrey: Newdigate                             | C           | c1            | c1              | 0.94                | -                    | -                   | This study            |
| MTD T 14158 | Great Britain: Surrey: Newdigate                             | E           | h1            | h1              | 0.98                | -                    | -                   | This study            |
| MTD T 14159 | Great Britain: Surrey: Newdigate                             | E           | h1            | h1              | 0.98                | -                    | -                   | This study            |
| MTD T 14160 | Great Britain: Surrey: Newdigate                             | E           | h1            | h21             | 0.96                | -                    | -                   | This study            |
| MTD T 14161 | Great Britain: Surrey: Newdigate                             | E           | h1            | h21             | 0.82                | -                    | -                   | This study            |
| MTD T 14464 | Great Britain: Surrey: Newdigate                             | E           | h1            | h21             | 0.99                | -                    | -                   | This study            |
| MTD T 14465 | Great Britain: Surrey: Newdigate                             | E           | h1            | h1              | 0.83                | -                    | -                   | This study            |
| MTD T 14466 | Great Britain: Surrey: Newdigate                             | F           | f1            | f1              | 0.93                | -                    | -                   | This study            |
| MTD T 14467 | Great Britain: Surrey: Newdigate                             | A           | a1            | a54             | 1.00                | -                    | -                   | This study            |
| MTD T 14468 | Great Britain: Surrey: Newdigate                             | E           | h1            | h1              | 0.99                | -                    | -                   | This study            |
| MTD T 14135 | Great Britain: Sussex: Heathfield                            | E           | h1            | h1              | 1.00                | -                    | -                   | This study            |
| MTD T 14143 | Great Britain: Warwickshire: Oxhill                          | E           | h1            | h1              | 1.00                | -                    | -                   | This study            |
| MTD T 14129 | Great Britain: Yorkshire: Bradford                           | E           | h1            | h1              | 1.00                | -                    | -                   | This study            |
| MTD T 14359 | Great Britain: Yorkshire: Skipwith Common                    | E           | h6            | h20             | 1.00                | -                    | -                   | This study            |
| MTD T 14360 | Great Britain: Yorkshire: Southern Washlands                 | E           | h6            | h1              | 1.00                | -                    | -                   | This study            |
| MTD T 14361 | Great Britain: Yorkshire: Southern Washlands                 | E           | h6            | h1              | 1.00                | -                    | -                   | This study            |
| BEV.12928   | Greece: 4 km NE Kalpaki                                      | 5           | i13           | i14             | 0.01                | 0.13                 | -                   | This study            |
| ZFMK 62945  | Greece: Chalkidiki: N Straton                                | 3           | y16           | y10             | 0.01                | 0.21                 | -                   | Kindler et al. (2013) |
| ZFMK 69946  | Greece: Chalkidiki: N Straton                                | 3           | y15           | y10             | 0.00                | 0.40                 | -                   | Kindler et al. (2013) |
| MTD D 19183 | Greece: Cyclades: Milos                                      | 3           | -             | y10             | 0.00                | 0.60                 | -                   | Kindler et al. (2013) |
| ZFMK 85407  | Greece: Cyclades: Milos                                      | 3           | y15           | -               | 0.00                | 0.78                 | -                   | Kindler et al. (2013) |
| MTD D 25827 | Greece: Cyclades: Paros                                      | 4           | r18           | -               | -                   | -                    | -                   | Kindler et al. (2013) |
| MTD T 8646  | Greece: Dadia                                                | 7           | g9            | g1              | 0.06                | -                    | -                   | Kindler et al. (2013) |
| MTD D 25843 | Greece: Kythira                                              | 5           | i16           | i6              | 0.01                | 0.12                 | -                   | Kindler et al. (2013) |
| ZFMK 54702  | Greece: Little Prespa Lake near Florina                      | 5           | i11           | i10             | 0.01                | 0.15                 | -                   | Kindler et al. (2013) |
| MTD T 14327 | Greece: Milos                                                | 3           | y15           | y10             | 0.00                | 0.50                 | -                   | This study            |
| ZFMK 71679  | Greece: Nestos Delta                                         | 3           | -             | y10             | 0.02                | 0.03                 | -                   | Kindler et al. (2013) |
| ZFMK 62506  | Greece: Peloponnese: Ilio                                    | 5           | i16           | -               | 0.00                | 0.24                 | -                   | Kindler et al. (2013) |
| MTD T 14337 | Greece: Peloponnese: Kalogria                                | 5           | i17           | i7              | 0.00                | 0.65                 | -                   | This study            |
| ZFMK 65179  | Greece: Peloponnese: Kalogria                                | 5           | i2            | -               | 0.00                | 0.03                 | -                   | Kindler et al. (2013) |
| ZFMK 71680  | Greece: Peloponnese: Kato Kostamen                           | 5           | i16           | i1              | 0.00                | 0.28                 | -                   | Kindler et al. (2013) |
| MTD T 13548 | Greece: Peloponnese: Lake Doxa                               | 5           | -             | i4              | 0.00                | 0.10                 | -                   | This study            |
| MTD T 14329 | Greece: Peloponnese: Lake Strofilia                          | 5           | i16           | i3              | 0.03                | 0.09                 | -                   | This study            |
| ZFMK 92217  | Greece: Peloponnese: Limni Strofilia near Kalogria           | 5           | i14           | i8              | 0.00                | 0.05                 | -                   | Kindler et al. (2013) |
| ZFMK 82103  | Greece: Peloponnese: near Pylos                              | 5           | i18           | i5              | 0.00                | 0.16                 | -                   | Kindler et al. (2013) |
| ZFMK 83029  | Greece: Peloponnese: near Pylos                              | 5           | i16           | i2              | 0.01                | 0.20                 | -                   | Kindler et al. (2013) |
| ZFMK 84037  | Greece: Peloponnese: near Pylos                              | 5           | i18           | i5              | 0.03                | 0.04                 | -                   | Kindler et al. (2013) |
| ZFMK 86043  | Greece: Peloponnese: near Pylos                              | 5           | i16           | i5              | 0.04                | 0.07                 | -                   | Kindler et al. (2013) |
| ZFMK 86045  | Greece: Peloponnese: near Pylos                              | 5           | -             | i5              | 0.01                | 0.22                 | -                   | Kindler et al. (2013) |
| MTD T 14336 | Greece: Peloponnese: Strofilia                               | 5           | i19           | i8              | 0.01                | 0.08                 | -                   | This study            |
| ZFMK 89415  | Greece: Samos                                                | 7           | g8            | -               | 0.02                | 0.02                 | -                   | Kindler et al. (2013) |
| MTD T 11813 | Greece: Samothrace                                           | 7           | g6            | -               | 0.00                | 0.02                 | -                   | This study            |
| MTD T 11814 | Greece: Samothrace                                           | 7           | g6            | -               | 0.00                | 0.03                 | -                   | This study            |
| MTD T 11815 | Greece: Samothrace                                           | 7           | g6            | -               | 0.01                | 0.05                 | -                   | This study            |
| MTD T 11816 | Greece: Samothrace                                           | 7           | g6            | g9              | 0.00                | 0.16                 | -                   | This study            |
| MTD T 11817 | Greece: Samothrace                                           | 7           | g6            | g9              | 0.00                | 0.04                 | -                   | This study            |
| MTD T 11818 | Greece: Samothrace                                           | 7           | g6            | -               | 0.00                | 0.04                 | -                   | This study            |
| MTD T 11819 | Greece: Samothrace                                           | 7           | g6            | -               | 0.01                | 0.13                 | -                   | This study            |
| MTD T 11822 | Greece: Samothrace                                           | 7           | g6            | -               | 0.01                | 0.12                 | -                   | This study            |
| MTD T 11824 | Greece: Samothrace                                           | 7           | g6            | -               | 0.00                | 0.09                 | -                   | This study            |
| MTD T 11825 | Greece: Samothrace                                           | 7           | g6            | -               | 0.00                | 0.10                 | -                   | This study            |
| MTD T 11826 | Greece: Samothrace                                           | 7           | g6            | -               | 0.01                | 0.04                 | -                   | This study            |
| MTD T 11829 | Greece: Samothrace                                           | 7           | g6            | -               | 0.00                | 0.03                 | -                   | This study            |
| MTD T 11830 | Greece: Samothrace                                           | 7           | g6            | -               | 0.00                | 0.04                 | -                   | This study            |
| MTD T 11834 | Greece: Samothrace                                           | 7           | g6            | -               | 0.00                | 0.14                 | -                   | This study            |
| MTD T 11837 | Greece: Samothrace                                           | 7           | g6            | -               | 0.00                | 0.02                 | -                   | This study            |
| MTD T 9907  | Greece: Skiros                                               | 3           | y15           | y10             | 0.00                | 0.03                 | -                   | Kindler et al. (2013) |
| MTD T 8639  | Greece: Thessaloniki                                         | 3           | HF679875      | -               | 0.03                | 0.12                 | -                   | Kindler et al. (2013) |
| MTD D 29269 | Greece: Volos                                                | 3           | y15           | HF680174        | 0.01                | 0.17                 | -                   | Kindler et al. (2013) |
| ZFMK 62956  | Greece: Xanthos: Avdira                                      | 3           | y15           | y10             | 0.00                | 0.06                 | -                   | Kindler et al. (2013) |
| ZFMK 92957  | Greece: Xanthos: Avdira                                      | 3           | y15           | -               | 0.00                | 0.08                 | -                   | Kindler et al. (2013) |
| ZFMK 62958  | Greece: Xanthos: Jasmos                                      | 7           | g8            | -               | 0.01                | 0.08                 | -                   | Kindler et al. (2013) |
| MTD T 12033 | Hungary: Balaton: Balatonszepezd                             | 4           | r4            | -               | 0.00                | 0.31                 | -                   | This study            |
| ZFMK 58024  | Hungary: Balaton: Balatonszepezd                             | 4           | r4            | -               | 0.00                | 0.31                 | -                   | Kindler et al. (2013) |
| ZFMK 74927  | Hungary: Balaton: Tibany                                     | 4           | r3            | r10             | 0.00                | 0.64                 | -                   | Kindler et al. (2013) |
| MTD T 11207 | Hungary: Balaton: Tibany                                     | 4           | r3            | r2              | 0.00                | 0.92                 | -                   | This study            |
| MTD T 11888 | Hungary: Balaton: Tibany                                     | 4           | r24           | -               | 0.00                | 0.72                 | -                   | This study            |
| MTD T 11859 | Hungary: Balaton: Tibany                                     | 4           | r22           | r34             | 0.00                | 0.91                 | -                   | This study            |
| ZFMK 65686  | Hungary: Barcs                                               | 4           | r4            | r34             | 0.00                | 0.65                 | -                   | Kindler et al. (2013) |
| ZFMK 88062  | Hungary: between Sarád and Fentőlják                         | 4           | r4            | r34             | 0.00                | 0.40                 | -                   | Kindler et al. (2013) |
| MTD T 12942 | Hungary: Bodrogkisfalud                                      | 4           | r4            | r25             | 0.01                | 0.82                 | -                   | This study            |
| ZFMK 61029  | Hungary: Győr                                                | 4           | r4            | r10             | 0.00                | 0.97                 | 0.07                | Kindler et al. (2013) |
| ZFMK 91241  | Hungary: Hámisági-főcsatorna                                 | 4           | r4            | r38             | 0.00                | 0.77                 | -                   | Kindler et al. (2013) |
| NHMHV 36357 | Hungary: Hortobágy                                           | 4           | r3            | -               | 0.00                | 0.86                 | -                   | This study            |
| MTD T 9906  | Hungary: Hortobágy                                           | 4           | r3            | r3              | 0.00                | 0.89                 | -                   | Kindler et al. (2013) |
| MTD T 7571  | Hungary: Komposztér                                          | 4           | r4            | r34             | 0.00                | 0.93                 | -                   | Kindler et al. (2013) |
| MTD T 7574  | Hungary: Komposztér                                          | 4           | r3            | r27             | 0.00                | 0.62                 | -                   | Kindler et al. (2013) |
| MTD T 14547 | Hungary: Lévédféles                                          | 4           | r3            | r3              | 0.00                | 0.72                 | -                   | This study            |
| MTD T 12016 | Hungary: Lippó                                               | 4           | r3            | -               | 0.00                | 0.88                 | -                   | This study            |
| MTD T 11862 | Hungary: near Fülöpstallas                                   | 4           | r30           | -               | 0.00                | 0.97                 | 0.51                | This study            |
| MTD T 11863 | Hungary: near Fülöpstallas                                   | 4           | r4            | r39             | 0.00                | 0.52                 | -                   | This study            |
| MTD T 11595 | Hungary: near Komposztér: Sarlópaszta                        | 4           | r4            | r53             | 0.00                | 0.96                 | 0.37                | This study            |
| MTD T 12751 | Hungary: near Tokaj                                          | 4           | r3            | r3              | 0.00                | 0.95                 | 0.43                | This study            |
| MTD T 12752 | Hungary: near Tokaj                                          | 4           | r26           | r28             | 0.00                | 0.72                 | -                   | This study            |
| MTD T 12753 | Hungary: near Tokaj                                          | 4           | r3            | r3              | 0.00                | 0.98                 | 0.16                | This study            |
| MTD T 12754 | Hungary: near Tokaj                                          | 4           | r3            | r30             | 0.01                | 0.95                 | 0.71                | This study            |
| MTD T 12755 | Hungary: near Tokaj                                          | 4           | r3            | r3              | 0.00                | 0.60                 | -                   | This study            |
| MTD T 12756 | Hungary: near Tokaj                                          | 4           | r27           | r3              | 0.00                | 0.87                 | -                   | This study            |
| MTD T 12757 | Hungary: near Tokaj                                          | 4           | r3            | r13             | 0.00                | 0.92                 | -                   | This study            |
| MTD T 12758 | Hungary: near Tokaj                                          | 4           | r3            | r3              | 0.00                | 0.79                 | -                   | This study            |
| MTD T 12759 | Hungary: near Tokaj                                          | 4           | r3            | r3              | 0.00                | 0.96                 | 0.12                | This study            |
| MTD T 12760 | Hungary: near Tokaj                                          | 4           | r3            | r3              | 0.00                | 0.99                 | 0.41                | This study            |
| MTD T 12761 | Hungary: near Tokaj                                          | 4           | r27           | r3              | 0.00                | 0.98                 | 0.10                | This study            |
| MTD T 12762 | Hungary: near Tokaj                                          | 4           | r3            | r3              | 0.00                | 0.74                 | -                   | This study            |
| MTD T 12763 | Hungary: near Tokaj                                          | 4           | r3            | r3              | 0.00                | 0.68                 | -                   | This study            |
| MTD T 12764 | Hungary: near Tokaj                                          | 4           | r27           | r3              | 0.00                | 0.98                 | 0.37                | This study            |
| MTD T 12765 | Hungary: near Tokaj                                          | 4           | r3            | r3              | 0.00                | 0.99                 | 0.07                | This study            |
| MTD T 12766 | Hungary: near Tokaj                                          | 4           | r3            | r4              | 0.00                | 0.76                 | -                   | This study            |
| MTD T 12767 | Hungary: near Tokaj                                          | 4           | r3            | r3              | 0.01                | 0.98                 | 0.35                | This study            |
| MTD T 12768 | Hungary: near Tokaj                                          | 4           | r3            | r23             | 0.00                | 0.99                 | 0.58                | This study            |
| MTD T 12769 | Hungary: near Tokaj                                          | 4           | r3            | r3              | 0.00                | 0.96                 | 0.47                | This study            |
| MTD T 12770 | Hungary: near Tokaj                                          | 4           | r3            | r3              | 0.01                | 0.78                 | -                   | This study            |
| MTD T 12771 | Hungary: near Tokaj                                          | 4           | r3            | r3              | 0.00                | 0.92                 | -                   | This study            |
| MTD T 12772 | Hungary: near Tokaj                                          | 4           | r3            | r3              | 0.00                | 0.94                 | -                   | This study            |
| MTD T 12773 | Hungary: near Tokaj                                          | 4           | r3            | r3              | 0.00                | 0.91                 | -                   | This study            |
| MTD T 12774 | Hungary: near Tokaj                                          | 4           | r3            | r3              | 0.00                | 0.98                 | 0.31                | This study            |
| MTD T 12775 | Hungary: near Tokaj                                          | 4           | r3            | r3              | 0.00                | 0.96                 | 0.26                | This study            |

• Table S1 continued

| Voucher          | Locality                                      | mtDNA data  |               |                 | Microsatellite data |                      |                     | Reference             |
|------------------|-----------------------------------------------|-------------|---------------|-----------------|---------------------|----------------------|---------------------|-----------------------|
|                  |                                               | mtDNA clade | ND4 haplotype | cyt b haplotype | First STRUCTURE run | Second STRUCTURE run | Third STRUCTURE run |                       |
| MTD T 12776      | Hungary: near Tokaj                           | 4           | r3            | r3              | 0.01                | 0.92                 | -                   | This study            |
| MTD T 12777      | Hungary: near Tokaj                           | 4           | r3            | r4              | 0.00                | 0.95                 | 0.08                | This study            |
| MTD T 12778      | Hungary: near Tokaj                           | 4           | r3            | r3              | 0.00                | 0.98                 | 0.54                | This study            |
| MTD T 12779      | Hungary: near Tokaj                           | 4           | r3            | r3              | 0.00                | 0.97                 | 0.64                | This study            |
| MTD T 12780      | Hungary: near Tokaj                           | 4           | r3            | r3              | 0.00                | 0.81                 | -                   | This study            |
| ZFMK 85985       | Hungary: S Budapest                           | 4           | r4            | r34             | 0.00                | 0.84                 | -                   | Kindler et al. (2013) |
| ZFMK 82795       | Hungary: Somogyoszob                          | 4           | -             | r34             | 0.00                | 0.55                 | -                   | Kindler et al. (2013) |
| MTD T 11918      | Hungary: Szeged: Lake Feher                   | 4           | r14           | -               | 0.00                | 0.68                 | -                   | This study            |
| MTD T 11920      | Hungary: Szeged: Lake Feher                   | 4           | r3            | -               | 0.00                | 0.72                 | -                   | This study            |
| MTD T 12014      | Hungary: Szeged: Lake Feher                   | 4           | r3            | -               | 0.00                | 0.46                 | -                   | This study            |
| MTD T 12015      | Hungary: Szeged: Lake Feher                   | 4           | r3            | -               | 0.00                | 0.72                 | -                   | This study            |
| MTD T 11864      | Hungary: Tiszaalpir                           | 4           | r3            | r3              | 0.00                | 0.91                 | -                   | This study            |
| MTD T 11865      | Hungary: Tiszaalpir                           | 4           | r3            | r24             | 0.00                | 0.75                 | -                   | This study            |
| MTD T 11867      | Hungary: Tiszaalpir                           | 4           | r3            | -               | 0.00                | 0.90                 | -                   | This study            |
| MTD T 11879      | Hungary: Tömörd                               | 4           | r4            | r34             | 0.00                | 0.54                 | -                   | This study            |
| MTD T 11880      | Hungary: Tömörd                               | 4           | r4            | r36             | 0.00                | 0.69                 | -                   | This study            |
| MTD T 7594       | Hungary: Villány                              | 4           | r4            | r48             | 0.00                | 0.87                 | -                   | Kindler et al. (2013) |
| BEV.17571        | Kazakhstan: Lake Edyltor                      | 8           | gn1           | gn1             | 0.02                | 0.05                 | -                   | This study            |
| BEV.17572        | Kazakhstan: Lake Edyltor                      | 8           | gn1           | gn1             | 0.02                | 0.06                 | -                   | This study            |
| MTD T 14459      | Kosovo: Ferizaj                               | 4           | r20           | r31             | 0.03                | 0.49                 | -                   | This study            |
| MTD T 14460      | Kosovo: Ferizaj                               | 5           | r1            | r11             | 0.01                | 0.22                 | -                   | This study            |
| MTD T 14462      | Kosovo: Gnjaj                                 | 5           | r2            | -               | 0.00                | 0.13                 | -                   | This study            |
| MTD T 14458      | Kosovo: Nerodime e Poshime                    | 4           | r20           | -               | 0.01                | 0.26                 | -                   | This study            |
| MTD T 14461      | Kosovo: Topcjan                               | 3           | -             | r29             | 0.06                | -                    | -                   | This study            |
| MTD T 8967       | Lithuania: Marcinkevicius                     | 8           | r21           | gn6             | 0.00                | 0.10                 | -                   | Kindler et al. (2013) |
| MTD T 12787      | Lithuania: NE Silute                          | 8           | gn3           | gn1             | 0.00                | 0.74                 | -                   | This study            |
| MTD T 12788      | Lithuania: NE Silute                          | 8           | gn3           | gn1             | 0.00                | 0.20                 | -                   | This study            |
| MTD T 12790      | Lithuania: NE Silute                          | 8           | gn3           | gn1             | 0.00                | 0.27                 | -                   | This study            |
| MTD T 8968       | Lithuania: Traneinkas                         | 8           | gn1           | gn19            | 0.00                | 0.39                 | -                   | Kindler et al. (2013) |
| MTD T 14775      | Montenegro: Bjelasica                         | 4           | r4            | r1              | 0.06                | -                    | -                   | This study            |
| ZFMK 92216       | Montenegro: near island Ada                   | 5           | r2            | r12             | 0.00                | 0.12                 | -                   | Kindler et al. (2013) |
| MTD T 9875       | Montenegro: Sasovki, Zeleznica, Boka kotorska | 5           | r2            | r10             | 0.01                | 0.03                 | -                   | Kindler et al. (2013) |
| ZFMK 92205       | Montenegro: Skutari-Lake: Limjani             | 5           | r4            | r18             | 0.07                | -                    | -                   | Kindler et al. (2013) |
| ZFMK 92206       | Montenegro: Skutari-Lake: Limjani             | 5           | r2            | r13             | 0.01                | 0.07                 | -                   | Kindler et al. (2013) |
| MTD T 9908       | Montenegro: Spuz                              | 5           | r2            | r12             | 0.02                | 0.03                 | -                   | Kindler et al. (2013) |
| MTD T 13957      | Netherlands: Amstelveen                       | E           | h1            | -               | 1.00                | -                    | -                   | This study            |
| MTD T 13958      | Netherlands: Amstelveen                       | E           | h1            | -               | 1.00                | -                    | -                   | This study            |
| MTD T 13959      | Netherlands: Amstelveen                       | E           | h1            | h1              | 1.00                | -                    | -                   | This study            |
| MTD T 12131      | Netherlands: Amsterdam: IJ                    | E           | h1            | -               | 1.00                | -                    | -                   | This study            |
| MTD T 12132      | Netherlands: Amsterdam: IJ                    | E           | h1            | -               | 1.00                | -                    | -                   | This study            |
| MTD T 13960      | Netherlands: Boschoord                        | E           | h1            | h1              | 1.00                | -                    | -                   | This study            |
| MTD T 13970      | Netherlands: Boschoord                        | E           | h1            | h1              | 0.97                | -                    | -                   | This study            |
| MTD T 13971      | Netherlands: Boschoord                        | E           | h1            | h1              | 1.00                | -                    | -                   | This study            |
| MTD T 13954      | Netherlands: Durgelam V.E.                    | E           | h1            | h29             | 1.00                | -                    | -                   | This study            |
| MTD T 13955      | Netherlands: Durgelam V.E.                    | E           | h1            | h29             | 1.00                | -                    | -                   | This study            |
| MTD T 13956      | Netherlands: Durgelam V.E.                    | E           | h1            | h29             | 1.00                | -                    | -                   | This study            |
| MTD T 12129      | Netherlands: Flevoland: Kuinderbos            | E           | h1            | -               | 1.00                | -                    | -                   | This study            |
| MTD T 12133      | Netherlands: Flevoland: Kuinderbos            | E           | h1            | -               | 0.98                | -                    | -                   | This study            |
| MTD T 13960      | Netherlands: Heersum                          | E           | h1            | h1              | 1.00                | -                    | -                   | This study            |
| MTD T 13961      | Netherlands: Heersum                          | E           | h1            | h1              | 1.00                | -                    | -                   | This study            |
| MTD T 13962      | Netherlands: Heersum                          | E           | h1            | h1              | 1.00                | -                    | -                   | This study            |
| MTD T 13942      | Netherlands: Hooten                           | E           | h1            | -               | -                   | -                    | -                   | This study            |
| MTD T 13943      | Netherlands: Hooten                           | E           | h1            | h29             | 1.00                | -                    | -                   | This study            |
| MTD T 13944      | Netherlands: Hooten                           | E           | h1            | h29             | 0.99                | -                    | -                   | This study            |
| MTD T 13939      | Netherlands: Leersum                          | E           | h1            | h1              | 1.00                | -                    | -                   | This study            |
| MTD T 13940      | Netherlands: Leersum                          | E           | h1            | -               | -                   | -                    | -                   | This study            |
| MTD T 13941      | Netherlands: Leersum                          | E           | h1            | h29             | 1.00                | -                    | -                   | This study            |
| MTD T 13966      | Netherlands: Oldeberkoop                      | E           | h1            | h1              | 1.00                | -                    | -                   | This study            |
| MTD T 13967      | Netherlands: Oldeberkoop                      | E           | h1            | h1              | 1.00                | -                    | -                   | This study            |
| MTD T 13968      | Netherlands: Oldeberkoop                      | E           | h1            | h1              | 1.00                | -                    | -                   | This study            |
| MTD T 13945      | Netherlands: Oostvaardersplassen              | E           | h1            | h1              | 1.00                | -                    | -                   | This study            |
| MTD T 13946      | Netherlands: Oostvaardersplassen              | E           | h1            | h1              | 0.96                | -                    | -                   | This study            |
| MTD T 13947      | Netherlands: Oostvaardersplassen              | E           | h1            | h1              | 0.98                | -                    | -                   | This study            |
| MTD T 13963      | Netherlands: Rimbarg                          | E           | h1            | h1              | 1.00                | -                    | -                   | This study            |
| MTD T 13964      | Netherlands: Rimbarg                          | E           | h1            | h1              | 0.99                | -                    | -                   | This study            |
| MTD T 13965      | Netherlands: Rimbarg                          | E           | h1            | h1              | 0.99                | -                    | -                   | This study            |
| MTD T 13951      | Netherlands: Velp: Beekhuizen                 | E           | h1            | h1              | 1.00                | -                    | -                   | This study            |
| MTD T 13952      | Netherlands: Velp: Beekhuizen                 | E           | h1            | h1              | 1.00                | -                    | -                   | This study            |
| MTD T 13953      | Netherlands: Velp: Beekhuizen                 | E           | h1            | h1              | 1.00                | -                    | -                   | This study            |
| MTD T 13948      | Netherlands: Wageningen                       | E           | h1            | h25             | 1.00                | -                    | -                   | This study            |
| MTD T 13949      | Netherlands: Wageningen                       | E           | h1            | h1              | 1.00                | -                    | -                   | This study            |
| MTD T 13950      | Netherlands: Wageningen                       | E           | h1            | h1              | 1.00                | -                    | -                   | This study            |
| MTD T 11508      | Norway: Akershus: Ski                         | 3           | y1            | y1              | 0.03                | 0.98                 | 0.94                | Kindler et al. (2014) |
| MTD T 11509      | Norway: Akershus: Ski                         | 3           | y1            | y1              | 0.01                | 0.90                 | -                   | Kindler et al. (2014) |
| ZMUO 54-96       | Norway: Akershus: Son                         | 3           | y1            | y17             | 0.01                | 0.95                 | 0.95                | Kindler et al. (2013) |
| MTD T 11507      | Norway: Audebu: Ibestadommet                  | 3           | y1            | y5              | 0.04                | 0.95                 | 0.83                | Kindler et al. (2014) |
| MTD T 11566      | Norway: Holmestrand: Hallingsrud              | 3           | y1            | y17             | 0.01                | 0.99                 | 0.94                | Kindler et al. (2014) |
| ZMUO 31-83       | Norway: Oslo: Grotmo: Solvoldu                | 3           | y1            | y17             | 0.00                | 0.99                 | 0.95                | Kindler et al. (2013) |
| ZMUO 26-85       | Norway: Oslo: Maridalen: Skjervevenga         | 3           | y1            | y17             | 0.02                | 0.99                 | 0.95                | Kindler et al. (2013) |
| MTD T 11571      | Norway: Ostfold: Moss                         | 3           | y1            | y1              | 0.01                | 0.98                 | 0.93                | Kindler et al. (2014) |
| MTD T 11570      | Norway: southern Oslo                         | 3           | y1            | y17             | 0.06                | -                    | -                   | Kindler et al. (2014) |
| ZMUO III 10/2000 | Norway: Telemark: Levanngshavva               | 3           | y1            | y17             | -                   | -                    | -                   | Kindler et al. (2013) |
| MTD T 11966      | Poland: Lublin: Kotyn                         | 8           | gn5           | -               | 0.00                | 0.03                 | -                   | This study            |
| MTD T 12793      | Poland: Malopolska: Ksiqz Wielki              | 4           | r3            | r3              | 0.00                | 0.60                 | -                   | This study            |
| MTD T 12830      | Poland: Malopolska: Ksiqz Wielki              | 4           | r3            | r3              | 0.00                | 0.88                 | -                   | This study            |
| MTD T 12831      | Poland: Malopolska: Ksiqz Wielki              | 4           | r3            | r3              | 0.00                | 0.84                 | -                   | This study            |
| MTD T 10318      | Poland: Mazovia: Kampinos National Park       | 4           | r3            | r26             | 0.00                | 0.58                 | -                   | Kindler et al. (2013) |
| MTD T 9965       | Poland: Mazovia: Kampinos National Park       | 4           | r3            | -               | 0.00                | 0.37                 | -                   | Kindler et al. (2013) |
| MTD T 9966       | Poland: Mazovia: Kampinos National Park       | 4           | r3            | -               | 0.00                | 0.67                 | -                   | Kindler et al. (2013) |
| MTD T 9968       | Poland: Mazovia: Kampinos National Park       | 4           | r3            | r3              | 0.00                | 0.87                 | -                   | Kindler et al. (2013) |
| MTD T 9969       | Poland: Mazovia: Kampinos National Park       | 4           | r3            | r26             | 0.00                | 0.90                 | -                   | Kindler et al. (2013) |
| MTD T 9972       | Poland: Mazovia: Kampinos National Park       | 4           | r3            | r3              | 0.02                | 0.56                 | -                   | Kindler et al. (2013) |
| MTD T 9974       | Poland: Mazovia: Kampinos National Park       | 4           | r3            | -               | 0.00                | 0.57                 | -                   | Kindler et al. (2013) |
| BEV.7665         | Poland: Podlachia: Bialowieza National Park   | 8           | gn4           | gn1             | 0.00                | 0.05                 | -                   | This study            |
| MTD T 10314      | Poland: Podlachia: Bialowieza National Park   | 8           | gn1           | gn1             | 0.00                | 0.44                 | -                   | Kindler et al. (2013) |
| MTD T 10315      | Poland: Podlachia: Bialowieza National Park   | 8           | gn1           | gn2             | 0.00                | 0.28                 | -                   | Kindler et al. (2013) |
| MTD T 10316      | Poland: Podlachia: Bialowieza National Park   | 8           | gn1           | gn1             | 0.01                | 0.08                 | -                   | Kindler et al. (2013) |
| MTD T 9975       | Poland: Podlachia: Bialowieza National Park   | 8           | gn1           | -               | 0.00                | 0.12                 | -                   | Kindler et al. (2013) |
| MTD T 9976       | Poland: Podlachia: Bialowieza National Park   | 8           | gn1           | gn1             | 0.00                | 0.20                 | -                   | Kindler et al. (2013) |
| MTD T 9977       | Poland: Podlachia: Bialowieza National Park   | 8           | gn1           | gn1             | 0.00                | 0.41                 | -                   | Kindler et al. (2013) |
| MTD T 9637       | Poland: Upper Silesia: Golezowice             | 4           | r2            | r10             | 0.00                | 0.95                 | 0.18                | Kindler et al. (2013) |
| MTD T 10025      | Poland: Upper Silesia: Kotficz Wielki         | 4           | r3            | r10             | 0.00                | 0.95                 | 0.19                | Kindler et al. (2013) |
| MTD T 10026      | Poland: Upper Silesia: Kotficz Wielki         | 3           | y1            | -               | 0.00                | 0.97                 | 0.26                | Kindler et al. (2013) |
| MTD T 9635       | Poland: Upper Silesia: Krotnica               | 4           | r4            | r34             | 0.00                | 0.99                 | 0.38                | Kindler et al. (2013) |
| MTD T 9638       | Poland: Upper Silesia: Ligota Talowicka       | 4           | r2            | r10             | 0.00                | 0.90                 | -                   | Kindler et al. (2013) |
| MTD T 9636       | Poland: Upper Silesia: SE Opole               | 4           | r4            | r34             | 0.00                | 0.90                 | -                   | Kindler et al. (2013) |
| MTD T 11485      | Poland: Uesdon                                | 3           | y1            | y17             | 0.00                | 0.99                 | 0.91                | Kindler et al. (2014) |
| MTD T 11486      | Poland: Uesdon                                | 3           | y1            | y23             | 0.00                | 0.97                 | 0.73                | Kindler et al. (2014) |
| MTD T 8640       | Romania: Cerna Sat                            | 4           | r6            | -               | 0.00                | 0.98                 | 0.06                | Kindler et al. (2013) |
| MTD T 9889       | Romania: Chilia Veche                         | 4           | r3            | -               | 0.00                | 0.70                 | -                   | Kindler et al. (2013) |
| ZFMK 82775       | Romania: Constanta: Histria                   | 4           | -             | r3              | 0.01                | 0.50                 | -                   | Kindler et al. (2013) |
| MTD T 11604      | Romania: Crivina                              | 4           | r5            | r34             | 0.01                | 0.83                 | -                   | This study            |
| MTD T 8650       | Romania: Geogiu de Sus                        | 4           | r29           | r3              | 0.01                | 0.80                 | -                   | Kindler et al. (2013) |
| MTD T 13542      | Romania: Tarnovita                            | 4           | r3            | r3              | 0.00                | 0.36                 | -                   | This study            |
| ZFMK 91040       | Russia: Bryansk                               | 8           | gn7           | gn11            | 0.01                | 0.01                 | -                   | Kindler et al. (2013) |
| ZFMK 91041       | Russia: Bryansk                               | 8           | gn1           | gn1             | 0.00                | 0.01                 | -                   | Kindler et al. (2013) |
| MTD T 15445      | Russia: Chertusk                              | 8           | gn1           | gn1             | 0.02                | 0.05                 | -                   | This study            |
| MTD T 11970      | Russia: Dagestan: Machchakala                 | 8           | gn10          | -               | 0.01                | 0.01                 | -                   | This study            |
| MTD T 11971      | Russia: Dagestan: Machchakala                 | 8           | gn1           | -               | 0.00                | 0.04                 | -                   | This study            |
| ZFMK 65492       | Russia: Dagestan: Machchakala                 | 8           | gn4           | gn20            | 0.00                | 0.02                 | -                   | Kindler et al. (2013) |
| ZFMK 62396       | Russia: Dagestan: Tataynt                     | 8           | gn1           | gn9             | 0.01                | 0.01                 | -                   | Kindler et al. (2013) |
| ZFMK 60732       | Russia: Krasnodar: Odalymyzy                  | 8           | gn1           | gn3             | 0.00                | 0.05                 | -                   | Kindler et al. (2013) |
| ZFMK 58029       | Russia: Krasnodar: Tupsee                     | 8           | gn1           | gn21            | 0.02                | 0.03                 | -                   | Kindler et al. (2013) |
| ZFMK 70614       | Russia: Tula: Chopr River                     | 8           | gn1           | gn1             | 0.07                | -                    | -                   | Kindler et al. (2013) |

• Table S1 continued

| Voucher     | Locality                                       | mtDNA data  |               |                 | Microsatellite data |                      |                     | Reference             |
|-------------|------------------------------------------------|-------------|---------------|-----------------|---------------------|----------------------|---------------------|-----------------------|
|             |                                                | mtDNA clade | ND4 haplotype | cyt b haplotype | First STRUCTURE run | Second STRUCTURE run | Third STRUCTURE run |                       |
| ZFMK 72270  | Russia: Tula: S Tula: Chopr River              | 3           | r4            | r97             | 0.00                | 0.01                 | -                   | Kindler et al. (2013) |
| MTD T 14456 | Serbia: Belo Polje                             | 4           | r4            | -               | 0.00                | 0.45                 | -                   | This study            |
| MTD T 14455 | Serbia: Belo Polje                             | 4           | r4            | -               | 0.00                | 0.75                 | -                   | This study            |
| MTD T 14457 | Serbia: Džići                                  | 4           | r4            | r34             | 0.02                | 0.58                 | -                   | This study            |
| MTD T 12999 | Serbia: Donji Dubnik                           | 4           | r4            | r54             | 0.05                | 0.56                 | -                   | This study            |
| MTD T 12984 | Serbia: Prohor                                 | 3           | r15           | r10             | 0.01                | 0.40                 | -                   | This study            |
| MTD T 8975  | Slovakia: between Topofa and Ranina            | 4           | r3            | -               | 0.00                | 0.93                 | -                   | Kindler et al. (2013) |
| MTD T 12960 | Slovakia: Bodky                                | 4           | r4            | r96             | 0.00                | 0.97                 | 0.07                | This study            |
| MTD T 12961 | Slovakia: Bodky                                | 4           | r3            | r19             | 0.00                | 0.95                 | 0.19                | This study            |
| MTD T 12962 | Slovakia: Bodky                                | 4           | r3            | r10             | 0.00                | 0.97                 | 0.06                | This study            |
| MTD T 12963 | Slovakia: Bodky                                | 4           | r3            | r10             | 0.00                | 0.90                 | -                   | This study            |
| MTD T 12966 | Slovakia: Bratislava - Džuráň                  | 4           | r3            | r34             | 0.00                | 0.99                 | 0.19                | This study            |
| MTD T 12998 | Slovakia: Bratislava - Džuráň                  | 4           | r4            | r34             | 0.01                | 0.97                 | 0.10                | This study            |
| MTD T 12964 | Slovakia: Bratislava - Karlova Ves             | 4           | r4            | r34             | 0.00                | 0.95                 | 0.08                | This study            |
| MTD T 12967 | Slovakia: Bratislava - Karlova Ves             | 4           | r3            | r36             | 0.00                | 0.95                 | 0.14                | This study            |
| MTD T 14764 | Slovakia: Bratislava - Petržalka               | 4           | r3            | r10             | 0.00                | 0.99                 | 0.08                | This study            |
| MTD T 14765 | Slovakia: Bratislava - Petržalka               | 4           | r3            | r10             | 0.00                | 0.97                 | 0.07                | This study            |
| MTD T 14766 | Slovakia: Bratislava - Petržalka               | 4           | r3            | r19             | 0.00                | 0.98                 | 0.14                | This study            |
| MTD T 14767 | Slovakia: Bratislava - Petržalka               | 4           | r3            | r10             | 0.00                | 0.68                 | -                   | This study            |
| MTD T 19938 | Slovakia: Bratislava - Devínska Kobyla         | 4           | r3            | r10             | 0.00                | 0.98                 | 0.06                | This study            |
| MTD T 12944 | Slovakia: Bratislava - Železná Studnička       | 4           | r3            | r10             | 0.00                | 0.85                 | -                   | This study            |
| MTD T 12945 | Slovakia: Bratislava - Železná Studnička       | 4           | r3            | r16             | 0.00                | 0.96                 | 0.35                | This study            |
| MTD T 12946 | Slovakia: Bratislava - Železná Studnička       | 4           | r3            | r10             | 0.00                | 0.89                 | -                   | This study            |
| MTD T 12948 | Slovakia: Bratislava - Železná Studnička       | 4           | r3            | r53             | 0.00                | 0.95                 | 0.09                | This study            |
| MTD T 12949 | Slovakia: Bratislava - Železná Studnička       | 4           | r3            | r39             | 0.00                | 0.97                 | 0.08                | This study            |
| MTD T 12970 | Slovakia: Bratislava - Železná Studnička       | 4           | r3            | r57             | 0.00                | 0.98                 | 0.05                | This study            |
| MTD T 9017  | Slovakia: Bajakov                              | 4           | r3            | r2              | 0.00                | 0.96                 | 0.10                | Kindler et al. (2013) |
| MTD T 8648  | Slovakia: Červený Kláštor                      | 4           | r3            | r3              | 0.00                | 0.84                 | -                   | Kindler et al. (2013) |
| MTD T 14452 | Slovakia: Čižinské Piesky                      | 4           | r6            | r64             | 0.00                | 0.97                 | 0.36                | This study            |
| MTD T 14450 | Slovakia: Čunovo                               | 4           | r4            | r34             | 0.00                | 0.98                 | 0.41                | This study            |
| MTD T 9014  | Slovakia: Devín                                | 4           | r3            | r10             | 0.00                | 0.95                 | 0.08                | Kindler et al. (2013) |
| MTD T 14760 | Slovakia: Devínské Jazero                      | 4           | r3            | r3              | 0.00                | 0.74                 | -                   | This study            |
| MTD T 14761 | Slovakia: Devínské Jazero                      | 4           | r3            | r19             | 0.00                | 0.97                 | 0.08                | This study            |
| MTD T 12996 | Slovakia: Dunajská Lužná                       | 4           | r3            | r10             | 0.00                | 0.85                 | -                   | This study            |
| MTD T 12997 | Slovakia: Dunajská Lužná                       | 4           | r4            | r37             | 0.00                | 0.93                 | -                   | This study            |
| MTD T 14763 | Slovakia: Gbelec: Parížské močiare             | 4           | r4            | r34             | 0.00                | 0.78                 | -                   | This study            |
| MTD T 14448 | Slovakia: Itragov                              | 4           | r30           | r3              | 0.00                | 0.85                 | -                   | This study            |
| MTD T 8641  | Slovakia: Janova Lehota                        | 4           | r3            | r29             | 0.00                | 0.98                 | 0.12                | Kindler et al. (2013) |
| MTD T 9011  | Slovakia: Jurský Šúr                           | 4           | r4            | r33             | 0.00                | 0.98                 | 0.05                | Kindler et al. (2013) |
| MTD T 14754 | Slovakia: Kalinovo - Hrušovská zdŕž            | 4           | r3            | r10             | 0.00                | 0.99                 | 0.27                | This study            |
| MTD T 8635  | Slovakia: Kamienica nad Hronom                 | 4           | r6            | -               | -                   | -                    | -                   | Kindler et al. (2013) |
| MTD T 12983 | Slovakia: Kosovin                              | 4           | r4            | r46             | 0.00                | 0.95                 | 0.10                | This study            |
| MTD T 8632  | Slovakia: Kraľovany: Kraľovanská dolina        | 3           | r1            | r14             | 0.00                | 0.85                 | -                   | Kindler et al. (2013) |
| MTD T 14772 | Slovakia: Kysak: Hornád river                  | 4           | r3            | r5              | 0.00                | 0.99                 | 0.28                | This study            |
| MTD T 14776 | Slovakia: Lipovský Hradok: Bela river          | 4           | r1            | r10             | 0.00                | 0.95                 | 0.69                | This study            |
| MTD T 14762 | Slovakia: Matia: Žuvavský ľah                  | 4           | r4            | r34             | 0.00                | 0.83                 | -                   | This study            |
| MTD T 14773 | Slovakia: Margecovy: Ražin Dam                 | 4           | r3            | r3              | 0.00                | 0.87                 | -                   | This study            |
| MTD T 12947 | Slovakia: Marianka                             | 4           | r3            | r10             | 0.01                | 0.97                 | 0.40                | This study            |
| MTD T 12948 | Slovakia: Marianka                             | 4           | r4            | r56             | 0.00                | 0.97                 | 0.12                | This study            |
| MTD T 12949 | Slovakia: Marianka                             | 4           | r6            | r64             | 0.00                | 0.95                 | 0.13                | This study            |
| MTD T 12950 | Slovakia: Marianka                             | 4           | r4            | r34             | 0.00                | 0.94                 | -                   | This study            |
| MTD T 12951 | Slovakia: Marianka                             | 4           | r4            | r34             | 0.00                | 0.99                 | 0.13                | This study            |
| MTD T 12952 | Slovakia: Marianka                             | 4           | r3            | r10             | 0.00                | 0.76                 | -                   | This study            |
| MTD T 12953 | Slovakia: Marianka                             | 4           | r3            | r10             | 0.00                | 0.89                 | -                   | This study            |
| MTD T 12954 | Slovakia: Marianka                             | 4           | r4            | r56             | 0.00                | 0.99                 | 0.23                | This study            |
| MTD T 12955 | Slovakia: Marianka                             | 4           | r3            | r10             | 0.00                | 0.90                 | -                   | This study            |
| MTD T 12956 | Slovakia: Marianka                             | 4           | r4            | r53             | 0.00                | 0.93                 | -                   | This study            |
| MTD T 12957 | Slovakia: Marianka                             | 4           | r4            | r34             | 0.00                | 0.94                 | -                   | This study            |
| MTD T 12958 | Slovakia: Marianka                             | 4           | r4            | r48             | 0.00                | 0.76                 | -                   | This study            |
| MTD T 12959 | Slovakia: Marianka                             | 4           | r4            | r34             | 0.00                | 0.96                 | 0.03                | This study            |
| MTD T 14774 | Slovakia: Michalovec: Štravský kanál           | 4           | r3            | r2              | 0.00                | 0.92                 | -                   | This study            |
| MTD T 9019  | Slovakia: Mriánska Lehota                      | 4           | r31           | r26             | 0.00                | 0.79                 | -                   | Kindler et al. (2013) |
| MTD T 12943 | Slovakia: near Marcelová                       | 4           | r4            | r34             | -                   | -                    | -                   | This study            |
| MTD T 9018  | Slovakia: Regretovka                           | 4           | r3            | r7              | 0.00                | 0.98                 | 0.59                | Kindler et al. (2013) |
| MTD T 14449 | Slovakia: Rosovec                              | 4           | r23           | -               | 0.00                | 0.98                 | 0.05                | This study            |
| MTD T 9016  | Slovakia: Rosovec                              | 4           | r4            | r34             | 0.00                | 0.96                 | 0.17                | Kindler et al. (2013) |
| MTD T 11594 | Slovakia: Ružomberok                           | 3           | r1            | r14             | 0.00                | 0.93                 | -                   | This study            |
| MTD T 9009  | Slovakia: Sĺlica: Parožová jama                | 4           | r4            | -               | 0.00                | 0.99                 | 0.37                | Kindler et al. (2013) |
| MTD T 8637  | Slovakia: Sĺžnice                              | 4           | r3            | r3              | 0.00                | 0.84                 | -                   | Kindler et al. (2013) |
| MTD T 9020  | Slovakia: Stupava                              | 4           | r6            | r64             | 0.00                | 0.98                 | 0.07                | Kindler et al. (2013) |
| MTD T 10937 | Slovakia: Svätý Jur                            | 4           | r4            | r56             | 0.00                | 0.95                 | 0.14                | This study            |
| MTD T 12971 | Slovakia: Svätý Jur                            | 4           | r3            | r34             | 0.00                | 0.88                 | -                   | This study            |
| MTD T 12972 | Slovakia: Svätý Jur                            | 4           | r3            | r3              | 0.00                | 0.98                 | 0.10                | This study            |
| MTD T 12973 | Slovakia: Svätý Jur                            | 4           | r4            | r57             | 0.00                | 0.90                 | -                   | This study            |
| MTD T 12974 | Slovakia: Svätý Jur                            | 4           | r3            | r3              | 0.00                | 0.97                 | 0.14                | This study            |
| MTD T 12975 | Slovakia: Svätý Jur                            | 4           | r4            | r56             | 0.00                | 0.89                 | -                   | This study            |
| MTD T 12976 | Slovakia: Svätý Jur                            | 4           | r4            | r34             | 0.00                | 0.74                 | -                   | This study            |
| MTD T 12977 | Slovakia: Svätý Jur                            | 4           | r15           | r34             | 0.00                | 0.95                 | 0.12                | This study            |
| MTD T 12978 | Slovakia: Svätý Jur                            | 4           | r4            | r66             | 0.00                | 0.87                 | -                   | This study            |
| MTD T 12979 | Slovakia: Svätý Jur                            | 4           | r4            | r50             | 0.00                | 0.89                 | -                   | This study            |
| MTD T 12980 | Slovakia: Svätý Jur                            | 4           | r6            | r56             | 0.00                | 0.85                 | -                   | This study            |
| MTD T 12981 | Slovakia: Svätý Jur                            | 4           | r3            | r10             | 0.00                | 0.96                 | 0.08                | This study            |
| MTD T 12982 | Slovakia: Svätý Jur                            | 4           | r4            | r34             | 0.01                | 0.96                 | 0.51                | This study            |
| MTD T 8638  | Slovakia: Svetlice                             | 4           | r3            | -               | 0.00                | 0.92                 | -                   | Kindler et al. (2013) |
| MTD T 9015  | Slovakia: Tatra Mountains: Žiar                | 3           | r1            | r14             | 0.00                | 0.76                 | -                   | Kindler et al. (2013) |
| MTD T 9022  | Slovakia: Ulč                                  | 4           | r3            | r33             | 0.00                | 0.98                 | 0.38                | Kindler et al. (2013) |
| MTD T 14768 | Slovakia: Veľké Levčre                         | 4           | r32           | r3              | 0.00                | 0.71                 | -                   | This study            |
| MTD T 9010  | Slovakia: Weitov lom                           | 4           | r3            | r10             | 0.00                | 0.95                 | 0.08                | Kindler et al. (2013) |
| MTD T 10899 | Slovenia: Bela krajina: Zjot                   | 4           | r21           | r42             | -                   | -                    | -                   | This study            |
| MTD T 12729 | Slovenia: Bilje: Vipava river                  | 4           | r4            | r34             | 0.02                | 0.03                 | -                   | This study            |
| MTD T 11526 | Slovenia: Bled                                 | 4           | r4            | r34             | 0.00                | 0.44                 | -                   | This study            |
| MTD T 11540 | Slovenia: Borjana                              | 4           | r4            | r34             | 0.01                | 0.10                 | -                   | This study            |
| MTD T 11116 | Slovenia: Borovnica                            | 4           | r4            | r47             | 0.00                | 0.38                 | -                   | This study            |
| MTD T 11209 | Slovenia: Borovnica                            | 4           | r4            | r34             | 0.00                | 0.55                 | -                   | This study            |
| MTD T 12783 | Slovenia: Celje: Voglajna river                | 4           | r4            | r34             | 0.00                | 0.35                 | -                   | This study            |
| MTD T 11536 | Slovenia: Cerkljica Lake                       | 4           | r4            | r38             | 0.02                | 0.30                 | -                   | This study            |
| MTD T 11536 | Slovenia: Cerkljica Lake                       | 4           | r4            | r38             | 0.01                | 0.04                 | -                   | This study            |
| MTD T 11537 | Slovenia: Cerkljica Lake                       | 4           | r4            | r38             | 0.01                | 0.09                 | -                   | This study            |
| MTD T 11529 | Slovenia: Cerkljica Lake                       | 4           | r4            | -               | -                   | -                    | -                   | This study            |
| MTD T 11538 | Slovenia: Cerkljica Lake                       | 4           | r4            | r34             | 0.00                | 0.24                 | -                   | This study            |
| MTD T 11541 | Slovenia: Dragonje                             | 4           | r4            | r34             | 0.03                | 0.02                 | -                   | This study            |
| MTD T 10887 | Slovenia: Koper: Škočjanski zatok              | 4           | r4            | r34             | -                   | -                    | -                   | This study            |
| MTD T 10888 | Slovenia: Koper: Škočjanski zatok              | 4           | r17           | r60             | 0.00                | 0.16                 | -                   | This study            |
| MTD T 10889 | Slovenia: Koper: Škočjanski zatok              | 4           | r17           | r60             | 0.01                | 0.03                 | -                   | This study            |
| MTD T 10890 | Slovenia: Koper: Škočjanski zatok              | 4           | r17           | r60             | 0.01                | 0.02                 | -                   | This study            |
| MTD T 10891 | Slovenia: Koper: Škočjanski zatok              | 4           | r17           | r60             | 0.00                | 0.14                 | -                   | This study            |
| MTD T 10892 | Slovenia: Koper: Škočjanski zatok              | 4           | r4            | r34             | 0.10                | -                    | -                   | This study            |
| ZFMK 65382  | Slovenia: Ljubljana                            | 4           | r4            | r34             | 0.00                | 0.83                 | -                   | Kindler et al. (2013) |
| MTD T 14346 | Slovenia: Ljubljana moor: Čurnovec             | 4           | r4            | r34             | 0.00                | 0.39                 | -                   | This study            |
| MTD T 14349 | Slovenia: Ljubljana moor: Deponija Vic         | 4           | r4            | r34             | 0.03                | 0.52                 | -                   | This study            |
| MTD T 10885 | Slovenia: Ljubljana moor: Draga pri Igju       | 4           | r4            | r34             | 0.04                | 0.48                 | -                   | This study            |
| MTD T 10886 | Slovenia: Ljubljana moor: Draga pri Igju       | 4           | r4            | r34             | 0.00                | 0.10                 | -                   | This study            |
| MTD T 14347 | Slovenia: Ljubljana moor: Draga pri Igju       | 4           | r4            | r34             | 0.00                | 0.13                 | -                   | This study            |
| MTD T 14348 | Slovenia: Ljubljana moor: Draga pri Igju       | 4           | r4            | r34             | 0.00                | 0.06                 | -                   | This study            |
| MTD T 11533 | Slovenia: Ljubljana: Večna pot                 | 4           | r16           | r55             | -                   | -                    | -                   | This study            |
| MTD T 11215 | Slovenia: Ljubljansko barje                    | 4           | r4            | r34             | 0.00                | 0.04                 | -                   | This study            |
| MTD T 11534 | Slovenia: Ljubljansko barje: Bištra            | 4           | r4            | r34             | 0.00                | 0.02                 | -                   | This study            |
| MTD T 10900 | Slovenia: Ljubljansko barje: Log pri Brezovici | 4           | r4            | r34             | 0.00                | 0.12                 | -                   | This study            |
| MTD T 10901 | Slovenia: Ljubljansko barje: Palo              | 4           | r4            | r34             | 0.01                | 0.24                 | -                   | This study            |
| MTD T 10901 | Slovenia: Ljubljansko barje: Palo              | 4           | r4            | r34             | 0.00                | 0.12                 | -                   | This study            |
| MTD T 10902 | Slovenia: Ljubljansko barje: Palo              | 4           | r4            | r34             | 0.00                | 0.39                 | -                   | This study            |
| MTD T 10893 | Slovenia: Lukavec near Ljatorcer               | 4           | r4            | r56             | 0.00                | 0.89                 | -                   | This study            |
| MTD T 10894 | Slovenia: Lukavec near Ljatorcer               | 4           | r4            | r41             | 0.00                | 0.88                 | -                   | This study            |
| MTD T 12784 | Slovenia: Lukavec near Ljatorcer               | 4           | r4            | r63             | 0.00                | 0.54                 | -                   | This study            |



• Table S1 continued

| Voucher     | Locality                                                              | mtDNA data  |               |                 | Microsatellite data |                      |                     | Reference             |
|-------------|-----------------------------------------------------------------------|-------------|---------------|-----------------|---------------------|----------------------|---------------------|-----------------------|
|             |                                                                       | mtDNA clade | ND4 haplotype | cyt b haplotype | First STRUCTURE run | Second STRUCTURE run | Third STRUCTURE run |                       |
| MTD T 10895 | Slovenia: Lukavec near Ljutomer                                       | 4           | r13           | r24             | 0.00                | 0.29                 | -                   | This study            |
| MTD T 11113 | Slovenia: Mele                                                        | 4           | r4            | r34             | 0.00                | 0.30                 | -                   | This study            |
| MTD T 11114 | Slovenia: Marški Petrovci                                             | 4           | r25           | r34             | 0.03                | 0.65                 | -                   | This study            |
| MTD T 11527 | Slovenia: near Maribor: Cigonica Forest                               | 4           | r8            | r33             | 0.00                | 0.80                 | -                   | This study            |
| MTD T 11530 | Slovenia: near Maribor: Racki Ribnik                                  | 4           | r4            | r34             | 0.01                | 0.34                 | -                   | This study            |
| MTD T 12088 | Slovenia: Podlipa                                                     | 4           | r4            | r34             | 0.05                | 0.04                 | -                   | This study            |
| MTD T 11531 | Slovenia: Pragersko                                                   | 4           | r4            | r41             | 0.00                | 0.06                 | -                   | This study            |
| MTD T 12178 | Slovenia: Senjuri                                                     | 4           | r4            | r46             | 0.00                | 0.71                 | -                   | This study            |
| MTD T 11528 | Slovenia: Slovenia: Divača                                            | 4           | r4            | r49             | 0.00                | 0.16                 | -                   | This study            |
| MTD T 11115 | Slovenia: Tišina                                                      | 4           | r4            | r51             | 0.00                | 0.78                 | -                   | This study            |
| MTD T 11210 | Slovenia: Zadlje                                                      | 4           | r17           | r64             | 0.06                | -                    | -                   | This study            |
| ZMH R09956  | Sweden: Blekinge: Ågerum                                              | 3           | y1            | y20             | 0.00                | 0.99                 | 0.93                | This study            |
| ZFMK 36114  | Sweden: Gotland                                                       | 3           | y1            | y5              | -                   | -                    | -                   | Kindler et al. (2013) |
| ZFMK 38356  | Sweden: Gotland                                                       | 4           | r3            | r10             | -                   | -                    | -                   | Kindler et al. (2013) |
| BEV.6418    | Sweden: Gotland: near Burgsvik                                        | 8           | gn1           | gn1             | 0.00                | 0.99                 | -                   | This study            |
| MTD T 10921 | Sweden: Närke: Klockhammar                                            | 3           | y1            | y5              | 0.01                | 0.99                 | 0.88                | Kindler et al. (2014) |
| ZMH R09209  | Sweden: Öland: between Stenas and Resmo: Mockelmossen                 | 3           | y1            | y20             | 0.00                | 0.99                 | 0.94                | This study            |
| MTD T 10920 | Sweden: Öland: Halltorps Hage                                         | 3           | y36           | y17             | 0.05                | 0.99                 | 0.95                | Kindler et al. (2014) |
| MTD T 10921 | Sweden: Öland: Halltorps Hage                                         | 3           | y1            | y5              | 0.01                | 0.99                 | 0.93                | Kindler et al. (2014) |
| MTD T 10922 | Sweden: Öland: Halltorps Hage                                         | 3           | y1            | y5              | 0.01                | 0.99                 | 0.92                | Kindler et al. (2014) |
| ZMH R09624  | Sweden: Skåne: Maglehem                                               | 3           | y20           | -               | -                   | -                    | -                   | This study            |
| ZMH R09626  | Sweden: Skåne: Otteröd                                                | 3           | y1            | -               | -                   | -                    | -                   | This study            |
| MTD T 10919 | Sweden: Småland: Kalkmäla                                             | 3           | y25           | y28             | 0.00                | 0.99                 | 0.95                | Kindler et al. (2014) |
| MTD T 11580 | Sweden: Södermanland: near Boo                                        | 3           | y1            | y5              | 0.01                | 0.99                 | 0.93                | Kindler et al. (2014) |
| MTD T 11579 | Sweden: Södermanland: near Nyköping                                   | 3           | y1            | y17             | 0.01                | 0.99                 | 0.95                | Kindler et al. (2014) |
| MTD T 11581 | Sweden: Södermanland: near Nyköping                                   | 3           | y1            | y17             | 0.00                | 0.99                 | 0.94                | Kindler et al. (2014) |
| BEV.6417    | Sweden: Uppland: Focemark                                             | 3           | y1            | y25             | -                   | -                    | -                   | This study            |
| BEV.6419    | Sweden: Uppland: near Uppsala: Östervåla                              | 3           | y4            | y25             | 0.00                | 0.99                 | 0.85                | This study            |
| BEV.6420    | Sweden: Uppland: near Uppsala: Östervåla                              | 3           | y6            | y28             | -                   | -                    | -                   | This study            |
| MTD T 14859 | Sweden: Västergötland: Rånävig                                        | 3           | y1            | y17             | 0.02                | 0.99                 | 0.96                | This study            |
| MTD T 14860 | Sweden: Västergötland: Vegby                                          | 3           | y1            | y1              | 0.01                | 0.99                 | 0.96                | This study            |
| ROH01       | Switzerland: Aargau: Aarau: Rohr                                      | E           | h1            | h19             | 1.00                | -                    | -                   | This study            |
| ROH02       | Switzerland: Aargau: Aarau: Rohr                                      | E           | h9            | h23             | 1.00                | -                    | -                   | This study            |
| ROH04       | Switzerland: Aargau: Aarau: Rohr                                      | E           | h1            | h19             | 1.00                | -                    | -                   | This study            |
| BAD01       | Switzerland: Aargau: Bad Zurzach                                      | 3           | y1            | y1              | 0.16                | -                    | -                   | This study            |
| BAD02       | Switzerland: Aargau: Bad Zurzach                                      | 3           | y1            | y1              | 0.05                | 0.98                 | 0.09                | This study            |
| BAD03       | Switzerland: Aargau: Bad Zurzach                                      | 3           | y1            | y1              | 0.02                | 0.98                 | 0.21                | This study            |
| BAD04       | Switzerland: Aargau: Bad Zurzach                                      | 3           | y1            | y1              | 0.30                | -                    | -                   | This study            |
| BAD05       | Switzerland: Aargau: Bad Zurzach                                      | 3           | y1            | y1              | 0.01                | 0.99                 | 0.11                | This study            |
| BAD06       | Switzerland: Aargau: Bad Zurzach                                      | 3           | y1            | y1              | 0.22                | -                    | -                   | This study            |
| BAD07       | Switzerland: Aargau: Bad Zurzach                                      | 3           | y1            | y1              | 0.18                | -                    | -                   | This study            |
| BAD08       | Switzerland: Aargau: Bad Zurzach                                      | 3           | y1            | y1              | 0.35                | -                    | -                   | This study            |
| BAD09       | Switzerland: Aargau: Bad Zurzach                                      | 3           | y1            | y1              | 0.19                | -                    | -                   | This study            |
| BAD10       | Switzerland: Aargau: Bad Zurzach                                      | 3           | y1            | y1              | 0.29                | -                    | -                   | This study            |
| KCN001      | Switzerland: Aargau: Birmeslen                                        | E           | h1            | h1              | 1.00                | -                    | -                   | This study            |
| KCN02       | Switzerland: Aargau: Birmeslen                                        | E           | h1            | h1              | 1.00                | -                    | -                   | This study            |
| BRU01       | Switzerland: Aargau: Brugg                                            | E           | h1            | h30             | 1.00                | -                    | -                   | This study            |
| BRU02       | Switzerland: Aargau: Brugg                                            | E           | h9            | h23             | 1.00                | -                    | -                   | This study            |
| BRU03       | Switzerland: Aargau: Brugg                                            | E           | h1            | h1              | 1.00                | -                    | -                   | This study            |
| AGG001      | Switzerland: Aargau: Eiken                                            | E           | h9            | h23             | 0.79                | -                    | -                   | This study            |
| AGG002      | Switzerland: Aargau: Eiken                                            | E           | h9            | h23             | 0.67                | -                    | -                   | This study            |
| AGG003      | Switzerland: Aargau: Eiken                                            | E           | h9            | h23             | 0.90                | -                    | -                   | This study            |
| GIP01       | Switzerland: Aargau: Gippingen                                        | E           | h1            | h1              | 0.98                | -                    | -                   | This study            |
| GIP02       | Switzerland: Aargau: Gippingen                                        | E           | h9            | h23             | 0.86                | -                    | -                   | This study            |
| GIP03       | Switzerland: Aargau: Gippingen                                        | E           | h9            | h23             | 1.00                | -                    | -                   | This study            |
| GIP04       | Switzerland: Aargau: Gippingen                                        | E           | h9            | h23             | 1.00                | -                    | -                   | This study            |
| GIP05       | Switzerland: Aargau: Gippingen                                        | E           | h1            | h1              | 1.00                | -                    | -                   | This study            |
| KL01        | Switzerland: Aargau: Klingnau                                         | E           | h1            | h19             | 1.00                | -                    | -                   | This study            |
| MUE06       | Switzerland: Aargau: Merenschwand                                     | unknown     | -             | -               | 1.00                | -                    | -                   | This study            |
| RIM01       | Switzerland: Aargau: Rietheim                                         | 3           | y37           | y1              | 0.15                | -                    | -                   | This study            |
| ROT01       | Switzerland: Aargau: Rottenschwil                                     | E           | h1            | h10             | 1.00                | -                    | -                   | This study            |
| REG02       | Switzerland: Basel-Landschaft: Binningen                              | E           | h1            | h11             | 0.98                | -                    | -                   | This study            |
| MBL14       | Switzerland: Basel-Landschaft: Liestal                                | E           | h1            | h11             | 1.00                | -                    | -                   | This study            |
| REG01       | Switzerland: Basel-Landschaft: Prätelen                               | E           | h1            | h1              | 1.00                | -                    | -                   | This study            |
| BBE01       | Switzerland: Bern: Airport Bern                                       | E           | h1            | h1              | 1.00                | -                    | -                   | This study            |
| BBE02       | Switzerland: Bern: Airport Bern                                       | E           | h1            | h18             | 1.00                | -                    | -                   | This study            |
| BBE03       | Switzerland: Bern: Airport Bern                                       | E           | h1            | h1              | 1.00                | -                    | -                   | This study            |
| BBE04       | Switzerland: Bern: Airport Bern                                       | E           | h1            | h23             | 0.99                | -                    | -                   | This study            |
| BBE05       | Switzerland: Bern: Airport Bern                                       | E           | h1            | h23             | 1.00                | -                    | -                   | This study            |
| BBE06       | Switzerland: Bern: Airport Bern                                       | E           | h1            | h1              | 1.00                | -                    | -                   | This study            |
| MBE10       | Switzerland: Bern: Airport Bern                                       | E           | h1            | h1              | 1.00                | -                    | -                   | This study            |
| MBE11       | Switzerland: Bern: Mühlebühl                                          | E           | h1            | h2              | 1.00                | -                    | -                   | This study            |
| MTD T 10083 | Switzerland: Bern: near Bern                                          | E           | h1            | h1              | 0.99                | -                    | -                   | Kindler et al. (2013) |
| MTD T 10085 | Switzerland: Bern: near Meiringen: Gudmundtal                         | E           | -             | h1              | 1.00                | -                    | -                   | Kindler et al. (2013) |
| MTD T 10086 | Switzerland: Bern: near Meiringen: Gudmundtal                         | E           | h3            | -               | 1.00                | -                    | -                   | Kindler et al. (2013) |
| MBE09       | Switzerland: Bern: Satz-Lättigen                                      | E           | h1            | h23             | 1.00                | -                    | -                   | This study            |
| MTD T 10084 | Switzerland: Fribourg: between Neuchâtel, Bern and Biel: Grosses Moos | E           | h1            | -               | 0.99                | -                    | -                   | Kindler et al. (2013) |
| MTD T 10085 | Switzerland: Fribourg: between Neuchâtel, Bern and Biel: Grosses Moos | E           | h1            | -               | 1.00                | -                    | -                   | Kindler et al. (2013) |
| CHU01       | Switzerland: Graubünden: Chur                                         | E           | h1            | h9              | 1.00                | -                    | -                   | This study            |
| BGR01       | Switzerland: Graubünden: Filisur                                      | E           | h1            | h9              | 1.00                | -                    | -                   | This study            |
| FLA01       | Switzerland: Graubünden: Flüsch                                       | E           | h1            | h9              | 1.00                | -                    | -                   | This study            |
| FLA02       | Switzerland: Graubünden: Flüsch                                       | E           | h1            | h9              | 0.99                | -                    | -                   | This study            |
| FLA03       | Switzerland: Graubünden: Flüsch                                       | E           | h1            | h9              | 1.00                | -                    | -                   | This study            |
| LAA01       | Switzerland: Graubünden: Laax                                         | E           | h1            | h9              | 1.00                | -                    | -                   | This study            |
| LAA02       | Switzerland: Graubünden: Laax                                         | E           | h1            | h9              | 0.99                | -                    | -                   | This study            |
| JUR01       | Switzerland: Jura: Beurnevésin                                        | unknown     | -             | -               | 1.00                | -                    | -                   | This study            |
| JUR02       | Switzerland: Jura: Beurnevésin                                        | unknown     | -             | -               | 1.00                | -                    | -                   | This study            |
| SHO01       | Switzerland: Schaffhausen: Hallau                                     | 3           | y1            | y1              | 0.24                | -                    | -                   | This study            |
| SHO02       | Switzerland: Schaffhausen: Hallau                                     | 3           | y1            | y1              | 0.22                | -                    | -                   | This study            |
| SHO03       | Switzerland: Schaffhausen: Hallau                                     | 3           | y1            | y1              | 0.22                | -                    | -                   | This study            |
| SAR01       | Switzerland: Schaffhausen: Hemhofen                                   | 3           | y1            | y1              | 0.04                | 0.99                 | 0.52                | This study            |
| SAR02       | Switzerland: Schaffhausen: Hemhofen                                   | 3           | y37           | y1              | 0.13                | -                    | -                   | This study            |
| SAR03       | Switzerland: Schaffhausen: Hemhofen                                   | 3           | y1            | y1              | 0.03                | 0.98                 | 0.11                | This study            |
| SHI01       | Switzerland: Schaffhausen: Herblingen                                 | 3           | y1            | y1              | 0.07                | -                    | -                   | This study            |
| SHI02       | Switzerland: Schaffhausen: Herblingen                                 | 3           | y1            | y12             | 0.12                | -                    | -                   | This study            |
| SHI03       | Switzerland: Schaffhausen: Herblingen                                 | 3           | y1            | y1              | 0.08                | -                    | -                   | This study            |
| MTD D 30567 | Switzerland: St. Gallen: Altschönen                                   | 3           | y1            | HF679958        | 0.07                | -                    | -                   | Kindler et al. (2013) |
| ALT01       | Switzerland: St. Gallen: Altschönen                                   | E           | h1            | h9              | 0.97                | -                    | -                   | This study            |
| ALT02       | Switzerland: St. Gallen: Altschönen                                   | E           | h1            | h1              | 0.97                | -                    | -                   | This study            |
| ALT03       | Switzerland: St. Gallen: Altschönen                                   | E           | h1            | h1              | 0.80                | -                    | -                   | This study            |
| ALT04       | Switzerland: St. Gallen: Altschönen                                   | E           | h1            | h1              | 0.99                | -                    | -                   | This study            |
| ALT05       | Switzerland: St. Gallen: Altschönen                                   | E           | h1            | h9              | 0.79                | -                    | -                   | This study            |
| BAL01       | Switzerland: St. Gallen: Balgach                                      | E           | h1            | h9              | 0.56                | -                    | -                   | This study            |
| BAL02       | Switzerland: St. Gallen: Balgach                                      | E           | h1            | h9              | 0.96                | -                    | -                   | This study            |
| BAL03       | Switzerland: St. Gallen: Balgach                                      | 3           | y40           | y1              | 0.66                | -                    | -                   | This study            |
| BAL04       | Switzerland: St. Gallen: Balgach                                      | E           | h1            | h9              | 0.98                | -                    | -                   | This study            |
| BAL05       | Switzerland: St. Gallen: Balgach                                      | unknown     | -             | -               | 0.71                | -                    | -                   | This study            |
| BCZ01       | Switzerland: St. Gallen: Berneck                                      | unknown     | -             | -               | 0.37                | -                    | -                   | This study            |
| BCZ02       | Switzerland: St. Gallen: Berneck                                      | 3           | y1            | -               | 0.25                | -                    | -                   | This study            |
| BCZ03       | Switzerland: St. Gallen: Berneck                                      | 3           | y1            | y1              | 0.27                | -                    | -                   | This study            |
| BCZ04       | Switzerland: St. Gallen: Berneck                                      | E           | h1            | h16             | 1.00                | -                    | -                   | This study            |
| BCZ05       | Switzerland: St. Gallen: Berneck                                      | E           | h1            | h22             | 0.99                | -                    | -                   | This study            |
| BCZ06       | Switzerland: St. Gallen: Berneck                                      | E           | h1            | h22             | 1.00                | -                    | -                   | This study            |
| BCZ07       | Switzerland: St. Gallen: Berneck                                      | E           | h1            | h10             | 1.00                | -                    | -                   | This study            |
| BCZ08       | Switzerland: St. Gallen: Berneck                                      | E           | h1            | h1              | 0.94                | -                    | -                   | This study            |
| BCZ09       | Switzerland: St. Gallen: Berneck                                      | E           | h1            | h1              | 1.00                | -                    | -                   | This study            |
| BCZ10       | Switzerland: St. Gallen: Berneck                                      | E           | h1            | h1              | 0.99                | -                    | -                   | This study            |
| BCZ11       | Switzerland: St. Gallen: Berneck                                      | E           | h1            | h1              | 0.99                | -                    | -                   | This study            |
| DEP01       | Switzerland: St. Gallen: Diepoldau                                    | 3           | y40           | y1              | 0.64                | -                    | -                   | This study            |
| DEP02       | Switzerland: St. Gallen: Diepoldau                                    | 3           | y40           | y1              | 0.66                | -                    | -                   | This study            |
| DEP03       | Switzerland: St. Gallen: Diepoldau                                    | 3           | y1            | y1              | 0.93                | -                    | -                   | This study            |
| DEP04       | Switzerland: St. Gallen: Diepoldau                                    | unknown     | -             | -               | 0.61                | -                    | -                   | This study            |
| MTD T 10088 | Switzerland: St. Gallen: Lake Constance: near Thal                    | 3           | y1            | -               | 0.25                | -                    | -                   | Kindler et al. (2013) |
| ÖBE01       | Switzerland: St. Gallen: Oberuzwil                                    | 3           | y1            | y1              | 0.05                | 0.98                 | 0.62                | This study            |

• Table S1 continued

| Voucher     | Locality                                          | mtDNA data  |               |                 | Microsatellite data |                      |                     | Reference             |
|-------------|---------------------------------------------------|-------------|---------------|-----------------|---------------------|----------------------|---------------------|-----------------------|
|             |                                                   | mtDNA clade | ND4 haplotype | cyt b haplotype | First STRUCTURE run | Second STRUCTURE run | Third STRUCTURE run |                       |
| OREB2       | Switzerland: St. Gallen: Oberuzwil                | E           | y1            | y1              | 0.07                | -                    | -                   | This study            |
| OREB3       | Switzerland: St. Gallen: Oberuzwil                | 3           | y42           | y36             | 0.08                | -                    | -                   | This study            |
| OREB4       | Switzerland: St. Gallen: Oberuzwil                | 3           | y42           | y36             | 0.05                | 0.98                 | 0.04                | This study            |
| OREB5       | Switzerland: St. Gallen: Oberuzwil                | 3           | y1            | y1              | 0.01                | 0.99                 | 0.25                | This study            |
| OREB6       | Switzerland: St. Gallen: Oberuzwil                | 3           | y1            | y1              | 0.01                | 0.99                 | 0.24                | This study            |
| OREB7       | Switzerland: St. Gallen: Oberuzwil                | 3           | y42           | y36             | 0.04                | 0.98                 | 0.06                | This study            |
| QUB1        | Switzerland: St. Gallen: Quinzen                  | E           | h1            | h12             | 1.00                | -                    | -                   | This study            |
| SMN01       | Switzerland: St. Gallen: Schmerikon               | E           | h1            | h13             | 1.00                | -                    | -                   | This study            |
| SMN02       | Switzerland: St. Gallen: Schmerikon               | E           | h1            | h13             | 0.99                | -                    | -                   | This study            |
| SMN03       | Switzerland: St. Gallen: Schmerikon               | E           | h1            | h3              | 0.91                | -                    | -                   | This study            |
| SEW01       | Switzerland: St. Gallen: Senwald                  | E           | h1            | h9              | 1.00                | -                    | -                   | This study            |
| NEB01       | Switzerland: St. Gallen: Thal                     | 3           | y40           | y1              | 0.28                | -                    | -                   | This study            |
| NEB02       | Switzerland: St. Gallen: Thal                     | E           | h1            | h9              | 0.24                | -                    | -                   | This study            |
| NEB03       | Switzerland: St. Gallen: Thal                     | 3           | y1            | y1              | 0.32                | -                    | -                   | This study            |
| NEB04       | Switzerland: St. Gallen: Thal                     | 3           | y1            | y1              | 0.27                | -                    | -                   | This study            |
| NEB05       | Switzerland: St. Gallen: Thal                     | E           | h1            | h9              | 0.31                | -                    | -                   | This study            |
| THA01       | Switzerland: St. Gallen: Thal                     | 3           | y1            | y1              | 0.22                | -                    | -                   | This study            |
| THA02       | Switzerland: St. Gallen: Thal                     | 3           | y40           | y36             | 0.36                | -                    | -                   | This study            |
| THA03       | Switzerland: St. Gallen: Thal                     | 3           | y1            | y1              | 0.21                | -                    | -                   | This study            |
| WIL01       | Switzerland: St. Gallen: Will                     | 3           | y1            | y36             | 0.16                | -                    | -                   | This study            |
| AAD01       | Switzerland: Thurgau: Aadorf                      | 3           | y37           | y1              | 0.28                | -                    | -                   | This study            |
| AAD02       | Switzerland: Thurgau: Aadorf                      | 3           | y37           | y1              | 0.45                | -                    | -                   | This study            |
| AAD03       | Switzerland: Thurgau: Aadorf                      | 3           | y37           | y1              | 0.23                | -                    | -                   | This study            |
| JUV01       | Switzerland: Thurgau: Alterswilen                 | 3           | y28           | y1              | 0.01                | 0.99                 | 0.12                | This study            |
| JUV02       | Switzerland: Thurgau: Alterswilen                 | 3           | y29           | y1              | 0.12                | -                    | -                   | This study            |
| JUV03       | Switzerland: Thurgau: Alterswilen                 | 3           | y27           | y1              | 0.11                | -                    | -                   | This study            |
| JUV04       | Switzerland: Thurgau: Alterswilen                 | 3           | y1            | y1              | 0.36                | -                    | -                   | This study            |
| JUV05       | Switzerland: Thurgau: Alterswilen                 | 3           | y27           | y1              | 0.11                | -                    | -                   | This study            |
| JUV06       | Switzerland: Thurgau: Alterswilen                 | 3           | y27           | y1              | 0.23                | -                    | -                   | This study            |
| NWN01       | Switzerland: Thurgau: Alterswilen                 | 3           | y1            | y1              | 0.19                | -                    | -                   | This study            |
| NWN02       | Switzerland: Thurgau: Alterswilen                 | 3           | y1            | y1              | 0.16                | -                    | -                   | This study            |
| BUR01       | Switzerland: Thurgau: Bürglen                     | 3           | y1            | y1              | 0.17                | -                    | -                   | This study            |
| BUR02       | Switzerland: Thurgau: Bürglen                     | 3           | y1            | y1              | 0.16                | -                    | -                   | This study            |
| FRA01       | Switzerland: Thurgau: Frauenfeld                  | 3           | y1            | y1              | 0.23                | -                    | -                   | This study            |
| FRA02       | Switzerland: Thurgau: Frauenfeld                  | 3           | y37           | y1              | 0.09                | -                    | -                   | This study            |
| KRE01       | Switzerland: Thurgau: Kreuzlingen                 | 3           | y1            | y1              | 0.09                | -                    | -                   | This study            |
| KRE02       | Switzerland: Thurgau: Kreuzlingen                 | 3           | y1            | y1              | 0.29                | -                    | -                   | This study            |
| KRE03       | Switzerland: Thurgau: Kreuzlingen                 | 3           | y1            | y1              | 0.19                | -                    | -                   | This study            |
| MUE01       | Switzerland: Uri: Erstfeld                        | E           | h1            | h1              | 1.00                | -                    | -                   | This study            |
| GEN01       | Switzerland: Vaud: Begnins                        | E           | h1            | h1              | 1.00                | -                    | -                   | This study            |
| MTD T 10079 | Switzerland: Vaud: Vinzel                         | E           | h1            | -               | 1.00                | -                    | -                   | Kindler et al. (2013) |
| DAT01       | Switzerland: Zürich: Därwil                       | 3           | y37           | y1              | 0.16                | -                    | -                   | This study            |
| DAT02       | Switzerland: Zürich: Därwil                       | 3           | y37           | y1              | 0.20                | -                    | -                   | This study            |
| DUB01       | Switzerland: Zürich: Dübendorf                    | 3           | y1            | y1              | 0.98                | -                    | -                   | This study            |
| DUB02       | Switzerland: Zürich: Dübendorf                    | 3           | y1            | y1              | 0.99                | -                    | -                   | This study            |
| DUB03       | Switzerland: Zürich: Dübendorf                    | 3           | y1            | y1              | 0.98                | -                    | -                   | This study            |
| DUB04       | Switzerland: Zürich: Dübendorf                    | 3           | y1            | y1              | 0.99                | -                    | -                   | This study            |
| FIS01       | Switzerland: Zürich: Fischenthal                  | E           | h1            | h1              | 0.86                | -                    | -                   | This study            |
| FIS02       | Switzerland: Zürich: Fischenthal                  | E           | h1            | h9              | 1.00                | -                    | -                   | This study            |
| FIS03       | Switzerland: Zürich: Fischenthal                  | E           | h1            | h1              | 1.00                | -                    | -                   | This study            |
| FCH01       | Switzerland: Zürich: Flaach                       | 3           | y37           | y1              | 0.02                | 0.96                 | 0.09                | This study            |
| FCH02       | Switzerland: Zürich: Flaach                       | 3           | y1            | y1              | 0.12                | -                    | -                   | This study            |
| FCH03       | Switzerland: Zürich: Flaach                       | 3           | y37           | y1              | 0.17                | -                    | -                   | This study            |
| FCH04       | Switzerland: Zürich: Flaach                       | 3           | y1            | y1              | 0.14                | -                    | -                   | This study            |
| FCH05       | Switzerland: Zürich: Flaach                       | unknown     | -             | -               | 0.17                | -                    | -                   | This study            |
| FCH06       | Switzerland: Zürich: Flaach                       | 3           | y1            | y1              | 0.20                | -                    | -                   | This study            |
| GAT01       | Switzerland: Zürich: Gattikon                     | E           | h11           | h23             | 0.98                | -                    | -                   | This study            |
| GAT02       | Switzerland: Zürich: Gattikon                     | E           | h1            | h1              | 0.98                | -                    | -                   | This study            |
| PPA01       | Switzerland: Zürich: Lake Pfäffikon               | E           | h1            | h26             | 0.97                | -                    | -                   | This study            |
| MUE07       | Switzerland: Zürich: Langnau am Albis             | E           | h1            | h1              | 0.99                | -                    | -                   | This study            |
| MAR01       | Switzerland: Zürich: Marthalen                    | 3           | y38           | y42             | 0.08                | -                    | -                   | This study            |
| MAR02       | Switzerland: Zürich: Marthalen                    | 3           | y1            | y35             | 0.25                | -                    | -                   | This study            |
| MAR03       | Switzerland: Zürich: Marthalen                    | 3           | y38           | y42             | 0.04                | 0.97                 | 0.09                | This study            |
| NEE01       | Switzerland: Zürich: Neerach                      | 3           | y1            | y1              | 0.31                | -                    | -                   | This study            |
| NEE02       | Switzerland: Zürich: Neerach                      | 3           | y1            | y1              | 0.16                | -                    | -                   | This study            |
| NEE03       | Switzerland: Zürich: Neerach                      | 3           | y1            | y1              | 0.23                | -                    | -                   | This study            |
| NEE04       | Switzerland: Zürich: Neerach                      | 3           | y1            | y32             | 0.05                | 0.99                 | 0.13                | This study            |
| OBF01       | Switzerland: Zürich: Obfelden                     | E           | h1            | h1              | 1.00                | -                    | -                   | This study            |
| OBF02       | Switzerland: Zürich: Obfelden                     | E           | h1            | h10             | 1.00                | -                    | -                   | This study            |
| PFU01       | Switzerland: Zürich: Pfungen                      | 3           | y33           | y1              | 0.46                | -                    | -                   | This study            |
| PFU02       | Switzerland: Zürich: Pfungen                      | 3           | y1            | y1              | 0.31                | -                    | -                   | This study            |
| PFU03       | Switzerland: Zürich: Pfungen                      | 3           | y1            | y1              | 0.28                | -                    | -                   | This study            |
| STA01       | Switzerland: Zürich: Stäfa                        | E           | h1            | h1              | 0.91                | -                    | -                   | This study            |
| STA02       | Switzerland: Zürich: Stäfa                        | E           | h1            | h1              | 0.96                | -                    | -                   | This study            |
| STA03       | Switzerland: Zürich: Stäfa                        | E           | h1            | h1              | 0.88                | -                    | -                   | This study            |
| STA04       | Switzerland: Zürich: Stäfa                        | E           | h1            | h1              | 0.97                | -                    | -                   | This study            |
| MUE02       | Switzerland: Zürich: Stallikon                    | unknown     | -             | -               | 0.96                | -                    | -                   | This study            |
| TAT01       | Switzerland: Zürich: Thalheim an der Thur         | 3           | y1            | y1              | 0.12                | -                    | -                   | This study            |
| GRF01       | Switzerland: Zürich: Uster                        | E           | h1            | h1              | 0.78                | -                    | -                   | This study            |
| WE01        | Switzerland: Zürich: Weiach                       | 3           | y1            | y1              | 0.16                | -                    | -                   | This study            |
| WE02        | Switzerland: Zürich: Weiach                       | 3           | y1            | y36             | 0.21                | -                    | -                   | This study            |
| WE03        | Switzerland: Zürich: Weiach                       | 3           | y33           | y1              | 0.02                | 0.96                 | 0.06                | This study            |
| MUE03       | Switzerland: Zürich: Wettswil am Albis            | unknown     | -             | -               | 0.99                | -                    | -                   | This study            |
| MUE04       | Switzerland: Zürich: Wettswil am Albis            | unknown     | -             | -               | 0.99                | -                    | -                   | This study            |
| WIN01       | Switzerland: Zürich: Winterthur: Sennhof          | E           | h1            | h1              | 0.44                | -                    | -                   | This study            |
| WIN02       | Switzerland: Zürich: Winterthur: Sennhof          | E           | h1            | h1              | 0.21                | -                    | -                   | This study            |
| WIN03       | Switzerland: Zürich: Winterthur: Sennhof          | E           | h1            | h1              | 0.41                | -                    | -                   | This study            |
| WIN04       | Switzerland: Zürich: Winterthur: Sennhof          | E           | h1            | h1              | 0.31                | -                    | -                   | This study            |
| ZEL01       | Switzerland: Zürich: Zeli                         | E           | h1            | h1              | 0.38                | -                    | -                   | This study            |
| ZEL02       | Switzerland: Zürich: Zeli                         | E           | h1            | h1              | 0.31                | -                    | -                   | This study            |
| ZEL03       | Switzerland: Zürich: Zeli                         | E           | h1            | h1              | 0.25                | -                    | -                   | This study            |
| ZEL04       | Switzerland: Zürich: Zeli                         | E           | h1            | h1              | 0.44                | -                    | -                   | This study            |
| ZEL05       | Switzerland: Zürich: Zeli                         | E           | h1            | h1              | 0.58                | -                    | -                   | This study            |
| ZEL06       | Switzerland: Zürich: Zeli                         | E           | h1            | h1              | 0.38                | -                    | -                   | This study            |
| ZEL07       | Switzerland: Zürich: Zeli                         | E           | h1            | h1              | 0.39                | -                    | -                   | This study            |
| ZHC01       | Switzerland: Zürich: Zürich                       | E           | h1            | h1              | 0.96                | -                    | -                   | This study            |
| ZHC02       | Switzerland: Zürich: Zürich                       | E           | h1            | h1              | 1.00                | -                    | -                   | This study            |
| ZHN01       | Switzerland: Zürich: Zürich: Affoltern            | E           | h1            | h12             | 1.00                | -                    | -                   | This study            |
| ZHN02       | Switzerland: Zürich: Zürich: Affoltern            | E           | h1            | h3              | 0.83                | -                    | -                   | This study            |
| KL001       | Switzerland: Zürich: Zürich: Airport              | 3           | y1            | y1              | 0.31                | -                    | -                   | This study            |
| KL002       | Switzerland: Zürich: Zürich: Airport              | 3           | y1            | y1              | 0.25                | -                    | -                   | This study            |
| KL003       | Switzerland: Zürich: Zürich: Airport              | 3           | y1            | y1              | 0.41                | -                    | -                   | This study            |
| KL004       | Switzerland: Zürich: Zürich: Airport              | E           | h1            | h12             | 0.35                | -                    | -                   | This study            |
| KL005       | Switzerland: Zürich: Zürich: Airport              | 3           | y1            | y1              | 0.22                | -                    | -                   | This study            |
| KL006       | Switzerland: Zürich: Zürich: Airport              | 3           | y1            | y1              | 0.34                | -                    | -                   | This study            |
| KL007       | Switzerland: Zürich: Zürich: Airport              | E           | h1            | h12             | 0.26                | -                    | -                   | This study            |
| KL008       | Switzerland: Zürich: Zürich: Airport              | 3           | y1            | y1              | 0.44                | -                    | -                   | This study            |
| KL009       | Switzerland: Zürich: Zürich: Airport              | 3           | y1            | y1              | 0.26                | -                    | -                   | This study            |
| KL010       | Switzerland: Zürich: Zürich: Airport              | 3           | y1            | y1              | 0.33                | -                    | -                   | This study            |
| ZFMK 47034  | Turkey: Aegean Region: between Söke and Doğanbey  | 7           | -             | gy12            | 0.02                | 0.03                 | -                   | Kindler et al. (2013) |
| ZFMK 82946  | Turkey: Aegean Region: Dalyan                     | 7           | HF679889      | gy13            | 0.01                | 0.03                 | -                   | Kindler et al. (2013) |
| MTD D 25227 | Turkey: Aegean Region: Selçuk                     | 7           | gy11          | HF680188        | 0.02                | 0.01                 | -                   | Kindler et al. (2013) |
| MTD D 25229 | Turkey: Aegean Region: Selçuk                     | 7           | gy8           | -               | 0.15                | -                    | -                   | Kindler et al. (2013) |
| MTD D 25230 | Turkey: Aegean Region: Selçuk                     | 7           | gy8           | HF680189        | 0.03                | 0.02                 | -                   | Kindler et al. (2013) |
| NHSMW 38053 | Turkey: Black Sea Region: 10 km E Gerde           | 8           | gn14          | gn16            | 0.02                | 0.02                 | -                   | This study            |
| ZFMK 71143  | Turkey: Black Sea Region: between Hopa and Arhavi | 8           | -             | gn15            | 0.00                | 0.02                 | -                   | Kindler et al. (2013) |
| ZFMK 71144  | Turkey: Black Sea Region: between Hopa and Arhavi | 8           | -             | gn14            | 0.00                | 0.01                 | -                   | Kindler et al. (2013) |
| ZFMK 71145  | Turkey: Black Sea Region: Buzluca                 | 8           | gn13          | gn18            | 0.00                | 0.02                 | -                   | Kindler et al. (2013) |
| REV 37392   | Turkey: Marmara Region: Beşevler                  | 7           | gy7           | gy8             | 0.00                | 0.02                 | -                   | This study            |
| MTD D 42725 | Ukraine: Crimean: Lachytse                        | 8           | gn1           | gn8             | 0.00                | 0.03                 | -                   | Kindler et al. (2013) |
| MTD D 42724 | Ukraine: Oblast Herson: Holsi Prystan; Herson'ke  | 8           | gn6           | gn12            | 0.00                | 0.04                 | -                   | Kindler et al. (2013) |

**Museum acronyms of vouchers for Table S1:**

BEV – Laboratoire de Biogéographie et Ecologie des Vertébrés, Centre d’Ecologie  
Fonctionnelle & Evolutive, Montpellier

LMNM – Landesmuseum Natur und Mensch, Oldenburg

MTD D – Museum of Zoology, Senckenberg Dresden (Herpetological Collection)

MTD T – Museum of Zoology, Senckenberg Dresden (Tissue Collection)

MWLK – Museum der Westlausitz, Kamenz

NHMW – Naturhistorisches Museum Wien

NME – Naturkundemuseum Erfurt

SMF – Forschungsinstitut und Naturmuseum Senckenberg, Frankfurt a.M.

SMNS – Staatliches Museum für Naturkunde Stuttgart

SMNK – Staatliches Museum für Naturkunde Karlsruhe

ZFMK – Zoologisches Forschungsmuseum Alexander Koenig, Bonn

ZMB – Museum für Naturkunde Berlin

ZMH – Zoologisches Museum Hamburg

ZMUO – Zoologisk museum, Universitetet i Oslo

ZSM – Zoologische Staatssammlung München

ZSUM – Zoologische Sammlung der Philipps-Universität Marburg

**Table S2. Akaike Information Criterion (AIC) scores for fitted clines under different models using the R package HZAR (Derryberry *et al.* 2014). Bold values in blue indicate the best-fit model from the 15-model comparison.**

|                   | Contact zone I  |               | Contact zone II |               |
|-------------------|-----------------|---------------|-----------------|---------------|
|                   | Microsatellites | mtDNA         | Microsatellites | mtDNA         |
| <b>Null Model</b> | 152.846         | 184.261       | 68.427          | 254.247       |
| <b>Model 1</b>    | 38.966          | <b>17.566</b> | 11.670          | <b>74.262</b> |
| <b>Model 2</b>    | 22.132          | n/a           | <b>11.366</b>   | n/a           |
| <b>Model 3</b>    | 17.449          | 21.839        | 15.249          | 78.504        |
| <b>Model 4</b>    | 18.120          | 25.038        | 18.909          | n/a           |
| <b>Model 5</b>    | 17.692          | n/a           | 18.865          | 82.518        |
| <b>Model 6</b>    | 23.491          | 30.390        | 22.930          | 86.930        |
| <b>Model 7</b>    | 29.795          | 21.169        | 15.795          | 78.360        |
| <b>Model 8</b>    | <b>13.501</b>   | n/a           | 15.365          | n/a           |
| <b>Model 9</b>    | 19.169          | 26.013        | 18.782          | 82.610        |
| <b>Model 10</b>   | 36.967          | 21.694        | 15.573          | 78.360        |
| <b>Model 11</b>   | 26.258          | n/a           | 15.353          | n/a           |
| <b>Model 12</b>   | 21.600          | 26.034        | 19.168          | 82.724        |
| <b>Model 13</b>   | 15.214          | 21.694        | 15.111          | 78.360        |
| <b>Model 14</b>   | 15.295          | n/a           | 15.119          | n/a           |
| <b>Model 15</b>   | 20.469          | 25.999        | 19.306          | 82.733        |

**Table S3. European Nucleotide Archive (ENA) accession numbers of ND4 and *cyt b* haplotypes.**

| <b>ND4 haplotype</b>                                             | <b>Accession number</b> | <b><i>cyt b</i> haplotype</b> | <b>Accession number</b> |
|------------------------------------------------------------------|-------------------------|-------------------------------|-------------------------|
| <i>helvetica</i>                                                 |                         |                               |                         |
| <b>h1</b>                                                        | LT839092                | <b>h1</b>                     | LT839229                |
| <b>h2</b>                                                        | LT839093                | <b>h2</b>                     | LT839230                |
| <b>h3</b>                                                        | LT839094                | <b>h3</b>                     | LT839231                |
| <b>h4</b>                                                        | LT839095                | <b>h4</b>                     | LT839232                |
| <b>h5</b>                                                        | LT839096                | <b>h5</b>                     | LT839233                |
| <b>h6</b>                                                        | LT839097                | <b>h6</b>                     | LT839234                |
| <b>h7</b>                                                        | LT839098                | <b>h7</b>                     | LT839235                |
| <b>h8</b>                                                        | LT839099                | <b>h8</b>                     | LT839236                |
| <b>h9</b>                                                        | LT839100                | <b>h9</b>                     | LT839237                |
| <b>h10</b>                                                       | LT839101                | <b>h10</b>                    | LT839238                |
| <b>h11</b>                                                       | LT839102                | <b>h11</b>                    | LT839239                |
| <b>h12</b>                                                       | LT839103                | <b>h12</b>                    | LT839240                |
|                                                                  |                         | <b>h13</b>                    | LT839241                |
|                                                                  |                         | <b>h14</b>                    | LT839242                |
|                                                                  |                         | <b>h15</b>                    | LT839243                |
|                                                                  |                         | <b>h16</b>                    | LT839244                |
|                                                                  |                         | <b>h17</b>                    | LT839245                |
|                                                                  |                         | <b>h18</b>                    | LT839246                |
|                                                                  |                         | <b>h19</b>                    | LT839247                |
|                                                                  |                         | <b>h20</b>                    | LT839248                |
|                                                                  |                         | <b>h21</b>                    | LT839249                |
|                                                                  |                         | <b>h22</b>                    | LT839250                |
|                                                                  |                         | <b>h23</b>                    | LT839251                |
|                                                                  |                         | <b>h24</b>                    | LT839252                |
|                                                                  |                         | <b>h25</b>                    | LT839253                |
|                                                                  |                         | <b>h26</b>                    | LT839254                |
|                                                                  |                         | <b>h27</b>                    | LT839255                |
|                                                                  |                         | <b>h28</b>                    | LT839256                |
|                                                                  |                         | <b>h29</b>                    | LT839257                |
| <b>Yellow lineage (lineage 3 of Kindler <i>et al.</i>, 2013)</b> |                         |                               |                         |
| <b>y1</b>                                                        | LT839104                | <b>y1</b>                     | LT839258                |
| <b>y2</b>                                                        | LT839105                | <b>y2</b>                     | LT839259                |
| <b>y3</b>                                                        | LT839106                | <b>y3</b>                     | LT839260                |
| <b>y4</b>                                                        | LT839107                | <b>y4</b>                     | LT839261                |
| <b>y5</b>                                                        | LT839108                | <b>y5</b>                     | LT839262                |
| <b>y6</b>                                                        | LT839109                | <b>y6</b>                     | LT839263                |
| <b>y7</b>                                                        | LT839110                | <b>y7</b>                     | LT839264                |
| <b>y8</b>                                                        | LT839111                | <b>y8</b>                     | LT839265                |
| <b>y9</b>                                                        | LT839112                | <b>y9</b>                     | LT839266                |
| <b>y10</b>                                                       | LT839113                | <b>y10</b>                    | LT839267                |
| <b>y11</b>                                                       | LT839114                | <b>y11</b>                    | LT839268                |
| <b>y12</b>                                                       | LT839115                | <b>y12</b>                    | LT839269                |
| <b>y13</b>                                                       | LT839116                | <b>y13</b>                    | LT839270                |
| <b>y14</b>                                                       | LT839117                | <b>y14</b>                    | LT839271                |
| <b>y15</b>                                                       | LT839118                | <b>y15</b>                    | LT839272                |
| <b>y16</b>                                                       | LT839119                | <b>y16</b>                    | LT839273                |
| <b>y17</b>                                                       | LT839120                | <b>y17</b>                    | LT839274                |
| <b>y18</b>                                                       | LT839121                | <b>y18</b>                    | LT839275                |
| <b>y19</b>                                                       | LT839122                | <b>y19</b>                    | LT839276                |
| <b>y20</b>                                                       | LT839123                | <b>y20</b>                    | LT839277                |
| <b>y21</b>                                                       | LT839124                | <b>y21</b>                    | LT839278                |

• Table S3 continued

| <b>Yellow lineage (lineage 3 of Kindler <i>et al.</i>, 2013)</b> |          |     |          |
|------------------------------------------------------------------|----------|-----|----------|
| y22                                                              | LT839125 | y22 | LT839279 |
| y23                                                              | LT839126 | y23 | LT839280 |
| y24                                                              | LT839127 | y24 | LT839281 |
| y25                                                              | LT839128 | y25 | LT839282 |
| y26                                                              | LT839129 | y26 | LT839283 |
| y27                                                              | LT839130 | y27 | LT839284 |
| y28                                                              | LT839131 | y28 | LT839285 |
| y29                                                              | LT839132 | y29 | LT839286 |
| y30                                                              | LT839133 | y30 | LT839287 |
| y31                                                              | LT839134 | y31 | LT839288 |
| y32                                                              | LT839135 | y32 | LT839289 |
| y33                                                              | LT839136 | y33 | LT839290 |
| y34                                                              | LT839137 | y34 | LT839291 |
| y35                                                              | LT839138 | y35 | LT839292 |
| y36                                                              | LT839139 | y36 | LT839293 |
| y37                                                              | LT839140 | y37 | LT839294 |
| y38                                                              | LT839141 | y38 | LT839295 |
| y39                                                              | LT839142 | y39 | LT839296 |
| y40                                                              | LT839143 | y40 | LT839297 |
| y41                                                              | LT839144 | y41 | LT839298 |
| y42                                                              | LT839145 | y42 | LT839299 |
| y43                                                              | LT839146 |     |          |
| <b>Red lineage (lineage 4 of Kindler <i>et al.</i>, 2013)</b>    |          |     |          |
| r1                                                               | LT839147 | r1  | LT839300 |
| r2                                                               | LT839148 | r2  | LT839301 |
| r3                                                               | LT839149 | r3  | LT839302 |
| r4                                                               | LT839150 | r4  | LT839303 |
| r5                                                               | LT839151 | r5  | LT839304 |
| r6                                                               | LT839152 | r6  | LT839305 |
| r7                                                               | LT839153 | r7  | LT839306 |
| r8                                                               | LT839154 | r8  | LT839307 |
| r9                                                               | LT839155 | r9  | LT839308 |
| r10                                                              | LT839156 | r10 | LT839309 |
| r11                                                              | LT839157 | r11 | LT839310 |
| r12                                                              | LT839158 | r12 | LT839311 |
| r13                                                              | LT839159 | r13 | LT839312 |
| r14                                                              | LT839160 | r14 | LT839313 |
| r15                                                              | LT839161 | r15 | LT839314 |
| r16                                                              | LT839162 | r16 | LT839315 |
| r17                                                              | LT839163 | r17 | LT839316 |
| r18                                                              | LT839164 | r18 | LT839317 |
| r19                                                              | LT839165 | r19 | LT839318 |
| r20                                                              | LT839166 | r20 | LT839319 |
| r21                                                              | LT839167 | r21 | LT839320 |
| r22                                                              | LT839168 | r22 | LT839321 |
| r23                                                              | LT839169 | r23 | LT839322 |
| r24                                                              | LT839170 | r24 | LT839323 |
| r25                                                              | LT839171 | r25 | LT839324 |
| r26                                                              | LT839172 | r26 | LT839325 |
| r27                                                              | LT839173 | r27 | LT839326 |
| r28                                                              | LT839174 | r28 | LT839327 |
| r29                                                              | LT839175 | r29 | LT839328 |
| r30                                                              | LT839176 | r30 | LT839329 |
| r31                                                              | LT839177 | r31 | LT839330 |

• Table S3 continued

| <b>Red lineage (lineage 4 of Kindler <i>et al.</i>, 2013)</b>   |          |     |          |
|-----------------------------------------------------------------|----------|-----|----------|
| r32                                                             | LT839178 | r32 | LT839331 |
| r33                                                             | LT839179 | r33 | LT839332 |
|                                                                 |          | r34 | LT839333 |
|                                                                 |          | r35 | LT839334 |
|                                                                 |          | r36 | LT839335 |
|                                                                 |          | r37 | LT839336 |
|                                                                 |          | r38 | LT839337 |
|                                                                 |          | r39 | LT839338 |
|                                                                 |          | r40 | LT839339 |
|                                                                 |          | r41 | LT839340 |
|                                                                 |          | r42 | LT839341 |
|                                                                 |          | r43 | LT839342 |
|                                                                 |          | r44 | LT839343 |
|                                                                 |          | r45 | LT839344 |
|                                                                 |          | r46 | LT839345 |
|                                                                 |          | r47 | LT839346 |
|                                                                 |          | r48 | LT839347 |
|                                                                 |          | r49 | LT839348 |
|                                                                 |          | r50 | LT839349 |
|                                                                 |          | r51 | LT839350 |
|                                                                 |          | r52 | LT839351 |
|                                                                 |          | r53 | LT839352 |
|                                                                 |          | r54 | LT839353 |
|                                                                 |          | r55 | LT839354 |
|                                                                 |          | r56 | LT839355 |
|                                                                 |          | r57 | LT839356 |
|                                                                 |          | r58 | LT839357 |
|                                                                 |          | r59 | LT839358 |
|                                                                 |          | r60 | LT839359 |
|                                                                 |          | r61 | LT839360 |
|                                                                 |          | r62 | LT839361 |
|                                                                 |          | r63 | LT839362 |
|                                                                 |          | r64 | LT839363 |
|                                                                 |          | r65 | LT839364 |
|                                                                 |          | r66 | LT839365 |
| <b>Lilac lineage (lineage 5 of Kindler <i>et al.</i>, 2013)</b> |          |     |          |
| 11                                                              | LT839180 | 11  | LT839366 |
| 12                                                              | LT839181 | 12  | LT839367 |
| 13                                                              | LT839182 | 13  | LT839368 |
| 14                                                              | LT839183 | 14  | LT839369 |
| 15                                                              | LT839184 | 15  | LT839370 |
| 16                                                              | LT839185 | 16  | LT839371 |
| 17                                                              | LT839186 | 17  | LT839372 |
| 18                                                              | LT839187 | 18  | LT839373 |
| 19                                                              | LT839188 | 19  | LT839374 |
| 110                                                             | LT839189 | 110 | LT839375 |
| 111                                                             | LT839190 | 111 | LT839376 |
| 112                                                             | LT839191 | 112 | LT839377 |
| 113                                                             | LT839192 | 113 | LT839378 |
| 114                                                             | LT839193 | 114 | LT839379 |
| 115                                                             | LT839194 | 115 | LT839380 |
| 116                                                             | LT839195 | 116 | LT839381 |
| 117                                                             | LT839196 | 117 | LT839382 |
| 118                                                             | LT839197 | 118 | LT839383 |

• Table S3 continued

| <b>Lilac lineage (lineage 5 of Kindler <i>et al.</i>, 2013)</b> |          |             |          |
|-----------------------------------------------------------------|----------|-------------|----------|
| <b>l19</b>                                                      | LT839198 | <b>l19</b>  | LT839384 |
| <b>l20</b>                                                      | LT839199 | <b>l20</b>  | LT839385 |
|                                                                 |          | <b>l21</b>  | LT839386 |
|                                                                 |          | <b>l22</b>  | LT839387 |
| <b>Grey lineage (lineage 7 of Kindler <i>et al.</i>, 2013)</b>  |          |             |          |
| <b>gy1</b>                                                      | LT839200 | <b>gy1</b>  | LT839388 |
| <b>gy2</b>                                                      | LT839201 | <b>gy2</b>  | LT839389 |
| <b>gy3</b>                                                      | LT839202 | <b>gy3</b>  | LT839390 |
| <b>gy4</b>                                                      | LT839203 | <b>gy4</b>  | LT839391 |
| <b>gy5</b>                                                      | LT839204 | <b>gy5</b>  | LT839392 |
| <b>gy6</b>                                                      | LT839205 | <b>gy6</b>  | LT839393 |
| <b>gy7</b>                                                      | LT839206 | <b>gy7</b>  | LT839394 |
| <b>gy8</b>                                                      | LT839207 | <b>gy8</b>  | LT839395 |
| <b>gy9</b>                                                      | LT839208 | <b>gy9</b>  | LT839396 |
| <b>gy10</b>                                                     | LT839209 | <b>gy10</b> | LT839397 |
| <b>gy11</b>                                                     | LT839210 | <b>gy11</b> | LT839398 |
|                                                                 |          | <b>gy12</b> | LT839399 |
|                                                                 |          | <b>gy13</b> | LT839400 |
| <b>Green lineage (lineage 8 of Kindler <i>et al.</i>, 2013)</b> |          |             |          |
| <b>gn1</b>                                                      | LT839211 | <b>gn1</b>  | LT839401 |
| <b>gn2</b>                                                      | LT839212 | <b>gn2</b>  | LT839402 |
| <b>gn3</b>                                                      | LT839213 | <b>gn3</b>  | LT839403 |
| <b>gn4</b>                                                      | LT839214 | <b>gn4</b>  | LT839404 |
| <b>gn5</b>                                                      | LT839215 | <b>gn5</b>  | LT839405 |
| <b>gn6</b>                                                      | LT839216 | <b>gn6</b>  | LT839406 |
| <b>gn7</b>                                                      | LT839217 | <b>gn7</b>  | LT839407 |
| <b>gn8</b>                                                      | LT839218 | <b>gn8</b>  | LT839408 |
| <b>gn9</b>                                                      | LT839219 | <b>gn9</b>  | LT839409 |
| <b>gn10</b>                                                     | LT839220 | <b>gn10</b> | LT839410 |
| <b>gn11</b>                                                     | LT839221 | <b>gn11</b> | LT839411 |
| <b>gn12</b>                                                     | LT839222 | <b>gn12</b> | LT839412 |
| <b>gn13</b>                                                     | LT839223 | <b>gn13</b> | LT839413 |
| <b>gn14</b>                                                     | LT839224 | <b>gn14</b> | LT839414 |
| <b>gn15</b>                                                     | LT839225 | <b>gn15</b> | LT839415 |
| <b>gn16</b>                                                     | LT839226 | <b>gn16</b> | LT839416 |
|                                                                 |          | <b>gn17</b> | LT839417 |
|                                                                 |          | <b>gn18</b> | LT839418 |
|                                                                 |          | <b>gn19</b> | LT839419 |
|                                                                 |          | <b>gn20</b> | LT839420 |
|                                                                 |          | <b>gn21</b> | LT839421 |
| <b>Lineage C of Kindler <i>et al.</i> (2013)</b>                |          |             |          |
| <b>c1</b>                                                       | LT839227 | <b>c1</b>   | LT839422 |
|                                                                 |          | <b>c2</b>   | LT839423 |
| <b>Lineage F of Kindler <i>et al.</i> (2013)</b>                |          |             |          |
| <b>f1</b>                                                       | LT839228 | <b>f1</b>   | LT839424 |

**Table S4. Used microsatellite loci.** For primer sequences, annealing temperature and multiplex-sets, see Pokrant *et al.* (2016).

| Locus    | Repeat motif                               | Allele size range [bp] | Number of alleles | Original reference            |
|----------|--------------------------------------------|------------------------|-------------------|-------------------------------|
| Natnat09 | (AC) <sub>22</sub>                         | 80 - 144               | 25                | Meister <i>et al.</i> (2009)  |
| Natnat05 | (GT) <sub>16</sub>                         | 136 - 194              | 23                | Meister <i>et al.</i> (2009)  |
| μNt8new  | (AC) <sub>15</sub>                         | 75 - 123               | 20                | Meister <i>et al.</i> (2009)  |
| Nsμ3     | (ATCT) <sub>14</sub> ATC(CA) <sub>20</sub> | 139 - 457              | 39                | Prosser <i>et al.</i> (1999)  |
| μNt3     | (AC) <sub>16</sub>                         | 111 - 163              | 24                | Gautschi <i>et al.</i> (2000) |
| μNt7     | (AC) <sub>17</sub>                         | 164 - 212              | 25                | Gautschi <i>et al.</i> (2000) |
| 30       | (CA) <sub>14</sub>                         | 225 - 271              | 20                | Burns & Houlden (1999)        |
| Natnat11 | (GA) <sub>13</sub>                         | 102 - 228              | 25                | Meister <i>et al.</i> (2009)  |
| Natnat06 | (GT) <sub>21</sub>                         | 145 - 185              | 16                | Meister <i>et al.</i> (2009)  |
| Tbu A09  | (AC) <sub>7</sub>                          | 110 - 146              | 17                | Sloss <i>et al.</i> (2012)    |
| 3TS      | (GATA) <sub>19</sub>                       | 186 - 270              | 20                | Garner <i>et al.</i> (2002)   |
| Eobμ1    | (TG) <sub>21</sub>                         | 120 - 142              | 12                | Blouin-Demers & Gibbs (2003)  |
| Eobμ13   | (AC) <sub>20</sub>                         | 118 - 162              | 19                | Blouin-Demers & Gibbs (2003)  |

**Table S5. Genetic diversity of STRUCTURE clusters based on 13 microsatellite loci.**  $n$  number of individuals,  $n_A$  number of alleles,  $n_{\bar{A}}$  average number of alleles per locus,  $n_P$  number of private alleles,  $AR$  allelic richness,  $H_O$  average observed heterozygosity,  $H_E$  average expected heterozygosity.  $F_{IS}$  inbreeding coefficient,  $F_{ST}$  fixation index. Individuals with mixed ancestries not considered. All  $F_{IS}$  and  $F_{ST}$  values were statistically significant.

| Microsatellites             |     |       |               |       |        |       |       |          |          |
|-----------------------------|-----|-------|---------------|-------|--------|-------|-------|----------|----------|
| Cluster                     | $n$ | $n_A$ | $n_{\bar{A}}$ | $n_P$ | $AR$   | $H_O$ | $H_E$ | $F_{IS}$ | $F_{ST}$ |
| First STRUCTURE run         |     |       |               |       |        |       |       |          |          |
| <i>helvetica</i>            | 350 | 156   | 12.000        | 45    | 4.505  | 0.404 | 0.548 | 0.265    | 0.40     |
| <b>Eastern lineages*</b>    | 953 | 230   | 17.692        | 119   | 5.761  | 0.501 | 0.612 | 0.182    |          |
| Second STRUCTURE run        |     |       |               |       |        |       |       |          |          |
| <b>Yellow + red lineage</b> | 502 | 121   | 9.308         | 19    | 7.185  | 0.453 | 0.510 | 0.112    | 0.18     |
| <b>Adjacent lineages**</b>  | 100 | 186   | 14.308        | 84    | 14.006 | 0.510 | 0.712 | 0.285    |          |
| Third STRUCTURE run         |     |       |               |       |        |       |       |          |          |
| <b>Yellow</b>               | 175 | 83    | 6.385         | 12    | 6.025  | 0.423 | 0.467 | 0.095    | 0.11     |
| <b>Red</b>                  | 122 | 102   | 7.846         | 31    | 7.722  | 0.501 | 0.555 | 0.098    |          |

\*Yellow, red, lilac, grey and green lineages

\*\*Lilac, grey and green lineages



**Table S6. Simulated data.** Twenty samples of each parental group were chosen as pure parental genotypes. Using this data, 20 genotypes of each hybrid class (F<sub>1</sub>, F<sub>2</sub> and the two backcrosses) were modelled in HYBRIDLAB and analyzed with STRUCTURE. Individuals with *Q* values ≥ 92% were reliably identified as pure *helvetica*, individuals with *Q* values ≥ 95% as eastern grass snakes. Regarding the yellow and red lineages, the differentiation from backcrosses was more difficult. Although there was a misassignment rate of 5% for the pure yellow lineage, we decided to treat grass snakes with at least 80% cluster membership as pure yellow because otherwise the misidentification rate with backcrosses would be too high. Individuals with at least 83% were treated as pure red.

|                        | Parental group 1         | Parental group 2         | F <sub>1</sub><br>(referred to<br>parental 1<br>cluster) | F <sub>1</sub><br>(referred to<br>parental 2<br>cluster) | F <sub>2</sub><br>(referred to<br>parental 1<br>cluster) | F <sub>2</sub><br>(referred to<br>parental 2<br>cluster) | Backcross<br>parental 1   | Backcross<br>parental 2   |
|------------------------|--------------------------|--------------------------|----------------------------------------------------------|----------------------------------------------------------|----------------------------------------------------------|----------------------------------------------------------|---------------------------|---------------------------|
|                        | <i>helvetica</i>         | Eastern lineages         |                                                          |                                                          |                                                          |                                                          |                           |                           |
| Average <i>Q</i> score | 0.965                    | 0.971                    | 0.493                                                    | 0.507                                                    | 0.467                                                    | 0.533                                                    | 0.772                     | 0.765                     |
| SD                     | 0.013                    | 0.007                    | 0.034                                                    | 0.034                                                    | 0.095                                                    | 0.095                                                    | 0.078                     | 0.066                     |
| Minimum <i>Q</i>       | 0.921                    | 0.954                    | 0.444                                                    | 0.444                                                    | 0.328                                                    | 0.319                                                    | 0.634                     | 0.661                     |
| Maximum <i>Q</i>       | 0.997                    | 0.979                    | 0.556                                                    | 0.556                                                    | 0.681                                                    | 0.672                                                    | 0.968                     | 0.912                     |
| Misassignment          | if <i>Q</i> < 92%:<br>0% | if <i>Q</i> < 95%:<br>0% | if <i>Q</i> < 92%:<br>0%                                 | if <i>Q</i> < 95%:<br>0%                                 | if <i>Q</i> < 92%:<br>0%                                 | if <i>Q</i> < 95%:<br>0%                                 | if <i>Q</i> < 92%:<br>5%  | if <i>Q</i> < 95%:<br>0%  |
|                        | Yellow lineage           | Red lineage              |                                                          |                                                          |                                                          |                                                          |                           |                           |
| Average <i>Q</i> score | 0.880                    | 0.890                    | 0.480                                                    | 0.520                                                    | 0.580                                                    | 0.420                                                    | 0.740                     | 0.720                     |
| SD                     | 0.049                    | 0.033                    | 0.149                                                    | 0.149                                                    | 0.192                                                    | 0.192                                                    | 0.140                     | 0.148                     |
| Minimum <i>Q</i>       | 0.770                    | 0.825                    | 0.191                                                    | 0.310                                                    | 0.206                                                    | 0.150                                                    | 0.442                     | 0.353                     |
| Maximum <i>Q</i>       | 0.935                    | 0.940                    | 0.690                                                    | 0.809                                                    | 0.850                                                    | 0.794                                                    | 0.925                     | 0.917                     |
| Misassignment          | if <i>Q</i> < 80%:<br>5% | if <i>Q</i> < 83%:<br>0% | if <i>Q</i> < 80%:<br>0%                                 | if <i>Q</i> < 83%:<br>0%                                 | if <i>Q</i> < 80%:<br>15%                                | if <i>Q</i> < 83%:<br>0%                                 | if <i>Q</i> < 80%:<br>40% | if <i>Q</i> < 83%:<br>30% |

## References

- Blouin-Demers, G. & Gibbs, H.L. Isolation and characterization of microsatellite loci in the black rat snake (*Elaphe obsoleta*). *Mol. Ecol. Notes* **3**, 98–99 (2003).
- Burns, E.L. & Houlden, B.A. Isolation and characterization of microsatellite markers in the broad-headed snake *Hoplocephalus bungaroides*. *Mol. Ecol.* **8**, 520–521 (1999).
- Derryberry, E.P., Derryberry, G.E., Maley, J.M. & Brumfield, R.T. HZAR: hybrid zone analysis using an R software package. *Mol. Ecol. Resour.* **14**, 652–663 (2014).
- Fritz, U., Corti, C. & Päckert, M. Mitochondrial DNA sequences suggest unexpected phylogenetic position of Corso-Sardinian grass snakes (*Natrix cetti*) and do not support their species status, with notes on phylogeography and subspecies delineation of grass snakes. *Org. Divers. Evol.* **12**, 71–80 (2012).
- Garner, T.W.J. *et al.* Geographic variation of multiple paternity in the common garter snake (*Thamnophis sirtalis*). *Copeia* **2002**, 15–23 (2002).
- Gautschi, B., Widmer, A. & Koella, J. Isolation and characterization of microsatellite loci in the dice snake (*Natrix tessellata*). *Mol. Ecol.* **9**, 2192–2193 (2000).
- Kabisch, K. *Natrix natrix* (Linnaeus, 1758) – Ringelnatter in *Handbuch der Reptilien und Amphibien Europas. Band 3/IIA: Schlangen II* (ed Böhme, W.), 513–580 (Aula-Verlag, 1999).
- Kindler, C. *et al.* Mitochondrial phylogeography, contact zones and taxonomy of grass snakes (*Natrix natrix*, *N. megalcephala*). *Zool. Scr.* **42**, 458–472 (2013).
- Kindler, C., Bringsøe, H. & Fritz, U. Phylogeography of grass snakes (*Natrix natrix*) all around the Baltic Sea: implications for the Holocene colonization of Fennoscandia. *Amphibia-Reptilia* **35**, 413–424 (2014).
- Kreiner, G. *Die Schlangen Europas* (Chimaira, 2007).
- Meister, B., Armbruster, F.J., Frauenfelder, N. & Bauer, B. Novel microsatellite loci in the grass snake (*Natrix natrix*) and cross-amplification in the dice snake (*Natrix tessellata*). *Mol. Ecol. Resour.* **9**, 604–606 (2009).
- Pokrant, F. *et al.* Integrative taxonomy provides evidence for the species status of the Ibero-Maghrebian grass snake *Natrix astreptophora*. *Biol. J. Linn. Soc.* **118**, 873–888 (2016).
- Prosser, M.R., Gibbs, H.L. & Weatherhead, P.J. Microgeographic population genetic structure in the northern water snake, *Nerodia sipedon sipedon* detected using microsatellite DNA loci. *Mol. Ecol.* **8**, 329–333 (1999).
- Sloss, B.L., Schuurman, G.W., Paloski, R.A., Boyle, O.D. & Kapfer, J.M. Novel microsatellite loci for studies of *Thamnophis* gartersnake genetic identity and hybridization. *Conserv. Genet. Resour.* **4**, 383–386 (2012).
